# Supplementary material for: Methylome-based cell-of-origin modeling (Methyl-COOM) identifies aberrant expression of immune regulatory molecules in CLL
Source: Genome Med. 2020 Mar 18;12:29. doi: 10.1186/s13073-020-00724-7 (PMC7081711; doi:10.1186/s13073-020-00724-7)
Supplement: Supplementary file 5 — Table S4, list of candidate target genes of CLL-specific microRNAs. [file 13073_2020_724_MOESM5_ESM.xlsx]

## Sheet: Sheet 1
Supplementary Table S4: List of candidate target genes of CLL-specific microRNAs
miRNA	Target.Gene	Experiments	Database
hsa-miR-195-5p	WEE1	ELISA//GFP reporter assay//Luciferase reporter assay//Microarray//qRT-PCR//Western blot	miRTarbase
hsa-miR-195-5p	WEE1	Immunoblot//Immunohistochemistry//Luciferase reporter assay//qRT-PCR	miRTarbase
hsa-miR-195-5p	WEE1	PAR-CLIP	miRTarbase
hsa-miR-195-5p	WEE1	PAR-CLIP	miRTarbase
hsa-miR-195-5p	E2F3	Immunohistochemistry//Luciferase reporter assay//Northern blot//qRT-PCR//Western blot//Reporter assay;Western blot;qRT-PCR;Other	miRTarbase
hsa-miR-195-5p	E2F3	Luciferase reporter assay//Western blot	miRTarbase
hsa-miR-195-5p	E2F3	HITS-CLIP	miRTarbase
hsa-miR-195-5p	CDK6	Reporter assay;Western blot;qRT-PCR;Other	miRTarbase
hsa-miR-195-5p	CDK6	Luciferase reporter assay//qRT-PCR//Western blot	miRTarbase
hsa-miR-195-5p	CDK6	PAR-CLIP	miRTarbase
hsa-miR-195-5p	CCND1	Luciferase reporter assay//Western blot	miRTarbase
hsa-miR-195-5p	CCND1	Luciferase reporter assay	miRTarbase
hsa-miR-195-5p	CCND1	Immunohistochemistry//Luciferase reporter assay//qRT-PCR//Western blot	miRTarbase
hsa-miR-195-5p	CCND1	Luciferase reporter assay//qRT-PCR//Western blot	miRTarbase
hsa-miR-195-5p	CCND1	PAR-CLIP	miRTarbase
hsa-miR-15a-5p	BMI1	Luciferase reporter assay//Western blot	miRTarbase
hsa-miR-15a-5p	WNT3A	Luciferase reporter assay	miRTarbase
hsa-miR-15a-5p	WNT3A	Luciferase reporter assay//qRT-PCR	miRTarbase
hsa-miR-15a-5p	MYB	Luciferase reporter assay//Western blot	miRTarbase
hsa-miR-15a-5p	MYB	Luciferase reporter assay//Microarray//qRT-PCR	miRTarbase
hsa-miR-15a-5p	CDC25A	Luciferase reporter assay	miRTarbase
hsa-miR-15a-5p	CDC25A	HITS-CLIP	miRTarbase
hsa-miR-15a-5p	CDC25A	PAR-CLIP	miRTarbase
hsa-miR-15a-5p	CCND2	Luciferase reporter assay	miRTarbase
hsa-miR-15a-5p	CCND2	PAR-CLIP	miRTarbase
hsa-miR-15a-5p	CCND2	PAR-CLIP	miRTarbase
hsa-miR-15a-5p	CCND2	CLASH	miRTarbase
hsa-miR-141-3p	ZEB2	Luciferase reporter assay//qRT-PCR//Western blot	miRTarbase
hsa-miR-141-3p	ZEB2	Luciferase reporter assay	miRTarbase
hsa-miR-141-3p	ZEB2	Luciferase reporter assay	miRTarbase
hsa-miR-141-3p	ZEB2	Luciferase reporter assay//qRT-PCR//Western blot	miRTarbase
hsa-miR-141-3p	ZEB2	Luciferase reporter assay//qRT-PCR//Western blot	miRTarbase
hsa-miR-141-3p	ZEB2	qRT-PCR	miRTarbase
hsa-miR-141-3p	ZEB2	TRAP	miRTarbase
hsa-miR-141-3p	ZEB2	Luciferase reporter assay//qRT-PCR	miRTarbase
hsa-miR-141-3p	ZEB1	Luciferase reporter assay	miRTarbase
hsa-miR-141-3p	ZEB1	In situ hybridization//qRT-PCR//Western blot	miRTarbase
hsa-miR-141-3p	ZEB1	Luciferase reporter assay//qRT-PCR//Western blot	miRTarbase
hsa-miR-141-3p	ZEB1	qRT-PCR;Other	miRTarbase
hsa-miR-141-3p	ZEB1	Luciferase reporter assay//qRT-PCR	miRTarbase
hsa-miR-141-3p	DLX5	Luciferase reporter assay	miRTarbase
hsa-miR-141-3p	BAP1	Reporter assay	miRTarbase
hsa-miR-141-3p	BAP1	Microarray	miRTarbase
hsa-miR-195-5p	BCL2L11	Microarray//Northern blot	miRTarbase
hsa-miR-195-5p	MECP2	Microarray//Northern blot	miRTarbase
hsa-miR-15a-5p	RAB9B	proteomics analysis	miRTarbase
hsa-miR-15a-5p	ACTR1A	proteomics analysis	miRTarbase
hsa-miR-15a-5p	TPI1	proteomics analysis	miRTarbase
hsa-miR-15a-5p	PDCD4	qRT-PCR	miRTarbase
hsa-miR-15a-5p	PDCD4	HITS-CLIP	miRTarbase
hsa-miR-15a-5p	RAB21	qRT-PCR	miRTarbase
hsa-miR-15a-5p	BCL2	Luciferase reporter assay//qRT-PCR//Western blot	miRTarbase
hsa-miR-15a-5p	BCL2	Luciferase reporter assay	miRTarbase
hsa-miR-15a-5p	BCL2	Luciferase reporter assay	miRTarbase
hsa-miR-15a-5p	BCL2	Western blot	miRTarbase
hsa-miR-15a-5p	BCL2	Western blot	miRTarbase
hsa-miR-15a-5p	BCL2	Microarray//qRT-PCR	miRTarbase
hsa-miR-15a-5p	BCL2	qRT-PCR//proteomics analysis	miRTarbase
hsa-miR-15a-5p	BCL2	HITS-CLIP	miRTarbase
hsa-miR-15a-5p	WT1	qRT-PCR//proteomics analysis	miRTarbase
hsa-miR-15a-5p	ASXL2	Microarray	miRTarbase
hsa-miR-15a-5p	TMEM251	Microarray	miRTarbase
hsa-miR-15a-5p	CARD8	Microarray	miRTarbase
hsa-miR-15a-5p	CDC14B	Microarray	miRTarbase
hsa-miR-15a-5p	CENPJ	Microarray	miRTarbase
hsa-miR-15a-5p	CEP63	Microarray	miRTarbase
hsa-miR-15a-5p	CREBL2	Microarray	miRTarbase
hsa-miR-15a-5p	CREBL2	PAR-CLIP	miRTarbase
hsa-miR-15a-5p	CREBL2	PAR-CLIP	miRTarbase
hsa-miR-15a-5p	ECHDC1	Microarray	miRTarbase
hsa-miR-15a-5p	GOLGA5	Microarray	miRTarbase
hsa-miR-15a-5p	GOLPH3L	Microarray	miRTarbase
hsa-miR-15a-5p	GTF2H1	Microarray	miRTarbase
hsa-miR-15a-5p	H3F3B	Microarray	miRTarbase
hsa-miR-15a-5p	HACE1	Microarray	miRTarbase
hsa-miR-15a-5p	HDHD2	Microarray	miRTarbase
hsa-miR-15a-5p	HERC6	Microarray	miRTarbase
hsa-miR-15a-5p	HRSP12	Microarray	miRTarbase
hsa-miR-15a-5p	HSDL2	Microarray	miRTarbase
hsa-miR-15a-5p	HSPA1A	Microarray	miRTarbase
hsa-miR-15a-5p	JUN	Microarray	miRTarbase
hsa-miR-15a-5p	MCL1	Microarray	miRTarbase
hsa-miR-15a-5p	MSH2	Microarray	miRTarbase
hsa-miR-15a-5p	OMA1	Microarray	miRTarbase
hsa-miR-15a-5p	OSGEPL1	Microarray	miRTarbase
hsa-miR-15a-5p	PDCD6IP	Microarray	miRTarbase
hsa-miR-15a-5p	PHKB	Microarray	miRTarbase
hsa-miR-15a-5p	PMS1	Microarray	miRTarbase
hsa-miR-15a-5p	PNN	Microarray	miRTarbase
hsa-miR-15a-5p	PRIM1	Microarray	miRTarbase
hsa-miR-15a-5p	RAD51C	Microarray	miRTarbase
hsa-miR-15a-5p	RHOT1	Microarray	miRTarbase
hsa-miR-15a-5p	RNASEL	Microarray	miRTarbase
hsa-miR-15a-5p	SLC35A1	Microarray	miRTarbase
hsa-miR-15a-5p	SLC35B3	Microarray	miRTarbase
hsa-miR-15a-5p	TIA1	Microarray	miRTarbase
hsa-miR-15a-5p	UGDH	Microarray	miRTarbase
hsa-miR-15a-5p	UGP2	Microarray	miRTarbase
hsa-miR-15a-5p	ZNF559	Microarray	miRTarbase
hsa-miR-15a-5p	CCND1	Luciferase reporter assay	miRTarbase
hsa-miR-15a-5p	CCND1	Luciferase reporter assay	miRTarbase
hsa-miR-15a-5p	CCND1	qRT-PCR//Luciferase reporter assay//Western blot	miRTarbase
hsa-miR-15a-5p	CCND1	CLASH	miRTarbase
hsa-miR-15a-5p	CCND1	PAR-CLIP	miRTarbase
hsa-miR-15a-5p	CCNE1	immunohistochemistry//Luciferase reporter assay//Microarray//qRT-PCR	miRTarbase
hsa-miR-15a-5p	CCNE1	Luciferase reporter assay	miRTarbase
hsa-miR-15a-5p	CCNE1	qRT-PCR//Luciferase reporter assay//Western blot	miRTarbase
hsa-miR-15a-5p	CCNE1	Luciferase reporter assay//qRT-PCR//Western blot	miRTarbase
hsa-miR-15a-5p	CCNE1	PAR-CLIP	miRTarbase
hsa-miR-15a-5p	CCNE1	PAR-CLIP	miRTarbase
hsa-miR-15a-5p	CCNE1	HITS-CLIP	miRTarbase
hsa-miR-15a-5p	BACE1	Luciferase reporter assay//Reporter assay;Other	miRTarbase
hsa-miR-141-3p	KLF5	Luciferase reporter assay//Reporter assay;Other	miRTarbase
hsa-miR-141-3p	STK3	Luciferase reporter assay//Reporter assay;Other	miRTarbase
hsa-miR-141-3p	TGFB2	Immunoblot//Luciferase reporter assay//qRT-PCR	miRTarbase
hsa-miR-141-3p	SFPQ	Immunoprecipitaion//Luciferase reporter assay//Western blot	miRTarbase
hsa-miR-15a-5p	DMTF1	Luciferase reporter assay//Reporter assay	miRTarbase
hsa-miR-15a-5p	DMTF1	PAR-CLIP	miRTarbase
hsa-miR-15a-5p	DMTF1	HITS-CLIP	miRTarbase
hsa-miR-141-3p	CLOCK	Luciferase reporter assay//Reporter assay	miRTarbase
hsa-miR-141-3p	CLOCK	Northern blot//qRT-PCR//Western blot	miRTarbase
hsa-miR-141-3p	BRD3	Luciferase reporter assay//Western blot//Reporter assay;Western blot;Other	miRTarbase
hsa-miR-141-3p	BRD3	PAR-CLIP	miRTarbase
hsa-miR-141-3p	UBAP1	Luciferase reporter assay//Western blot//Reporter assay;Western blot;Other	miRTarbase
hsa-miR-141-3p	PTEN	Luciferase reporter assay//Western blot//Reporter assay;Western blot;Other	miRTarbase
hsa-miR-141-3p	PTEN	PAR-CLIP	miRTarbase
hsa-miR-15a-5p	BRCA1	Luciferase reporter assay	miRTarbase
hsa-miR-15a-5p	AKT3	Luciferase reporter assay	miRTarbase
hsa-miR-15a-5p	AKT3	PAR-CLIP	miRTarbase
hsa-miR-15a-5p	AKT3	PAR-CLIP	miRTarbase
hsa-miR-15a-5p	WIPF1	Microarray	miRTarbase
hsa-miR-15a-5p	VPS45	Microarray	miRTarbase
hsa-miR-15a-5p	HSP90B1	Microarray	miRTarbase
hsa-miR-15a-5p	SKAP2	Microarray//qRT-PCR	miRTarbase
hsa-miR-15a-5p	NT5DC1	Microarray	miRTarbase
hsa-miR-15a-5p	FAM69A	Microarray	miRTarbase
hsa-miR-15a-5p	C2orf74	Microarray	miRTarbase
hsa-miR-15a-5p	FAM122C	Microarray	miRTarbase
hsa-miR-15a-5p	PWWP2A	Microarray	miRTarbase
hsa-miR-15a-5p	C17orf80	Microarray	miRTarbase
hsa-miR-15a-5p	CCDC111	Microarray	miRTarbase
hsa-miR-15a-5p	C2orf43	Microarray	miRTarbase
hsa-miR-15a-5p	C4orf27	Microarray	miRTarbase
hsa-miR-15a-5p	NIPAL2	Microarray	miRTarbase
hsa-miR-15a-5p	TRMT13	Microarray	miRTarbase
hsa-miR-15a-5p	ANAPC16	Microarray	miRTarbase
hsa-miR-15a-5p	CADM1	Reporter assay//qRT-PCR	miRTarbase
hsa-miR-15a-5p	TMEM184B	Luciferase reporter assay//Reporter assay	miRTarbase
hsa-miR-15a-5p	APP	PAR-CLIP	miRTarbase
hsa-miR-15a-5p	APP	Luciferase reporter assay	miRTarbase
hsa-miR-15a-5p	UCP2	Luciferase reporter assay//qRT-PCR	miRTarbase
hsa-miR-195-5p	VEGFA	ELISA//Luciferase reporter assay	miRTarbase
hsa-miR-195-5p	VEGFA	Luciferase reporter assay	miRTarbase
hsa-miR-195-5p	VEGFA	PAR-CLIP	miRTarbase
hsa-miR-195-5p	VEGFA	PAR-CLIP//HITS-CLIP	miRTarbase
hsa-miR-195-5p	VEGFA	PAR-CLIP	miRTarbase
hsa-miR-195-5p	VEGFA	HITS-CLIP	miRTarbase
hsa-miR-195-5p	VEGFA	PAR-CLIP	miRTarbase
hsa-miR-195-5p	VEGFA	PAR-CLIP	miRTarbase
hsa-miR-195-5p	VEGFA	PAR-CLIP	miRTarbase
hsa-miR-15a-5p	VEGFA	ELISA//Luciferase reporter assay	miRTarbase
hsa-miR-15a-5p	VEGFA	Luciferase reporter assay//qRT-PCR//Western blot	miRTarbase
hsa-miR-15a-5p	VEGFA	Luciferase reporter assay	miRTarbase
hsa-miR-15a-5p	VEGFA	PAR-CLIP	miRTarbase
hsa-miR-15a-5p	VEGFA	PAR-CLIP//HITS-CLIP	miRTarbase
hsa-miR-15a-5p	VEGFA	PAR-CLIP	miRTarbase
hsa-miR-15a-5p	VEGFA	HITS-CLIP	miRTarbase
hsa-miR-15a-5p	VEGFA	PAR-CLIP	miRTarbase
hsa-miR-15a-5p	VEGFA	PAR-CLIP	miRTarbase
hsa-miR-15a-5p	VEGFA	PAR-CLIP	miRTarbase
hsa-miR-195-5p	SKI	Microarray//Northern blot	miRTarbase
hsa-miR-195-5p	SKI	PAR-CLIP	miRTarbase
hsa-miR-195-5p	SKI	HITS-CLIP	miRTarbase
hsa-miR-486-5p	CD40	Microarray//qRT-PCR	miRTarbase
hsa-miR-141-3p	ZFPM2	Luciferase reporter assay//Western blot//Reporter assay	miRTarbase
hsa-miR-195-5p	CCL4	ELISA//Immunoprecipitaion//qRT-PCR//Western blot	miRTarbase
hsa-miR-15a-5p	TSPYL2	Luciferase reporter assay	miRTarbase
hsa-miR-15a-5p	NFKB1	Microarray//qRT-PCR	miRTarbase
hsa-miR-141-3p	TRAPPC2P1	Luciferase reporter assay	miRTarbase
hsa-miR-195-5p	KRT7	Immunoblot//qRT-PCR	miRTarbase
hsa-miR-195-5p	BCL2	Luciferase reporter assay//qRT-PCR//Western blot	miRTarbase
hsa-miR-195-5p	BCL2	Immunohistochemistry//Luciferase reporter assay//qRT-PCR//Western blot	miRTarbase
hsa-miR-195-5p	BCL2	HITS-CLIP	miRTarbase
hsa-miR-141-3p	EIF4E	Luciferase reporter assay//Northern blot//qRT-PCR//Western blot	miRTarbase
hsa-miR-15a-5p	CHUK	Luciferase reporter assay//qRT-PCR//Western blot	miRTarbase
hsa-miR-15a-5p	TP53	Immunoblot//Luciferase reporter assay	miRTarbase
hsa-miR-15a-5p	FGF7	Luciferase reporter assay//qRT-PCR	miRTarbase
hsa-miR-195-5p	RAF1	Luciferase reporter assay//Northern blot//qRT-PCR//Western blot	miRTarbase
hsa-miR-195-5p	RAF1	Flow//Immunofluorescence//qRT-PCR//Western blot	miRTarbase
hsa-miR-195-5p	RUNX2	Luciferase reporter assay//Northern blot//qRT-PCR//Western blot	miRTarbase
hsa-miR-141-3p	CTBP2	Luciferase reporter assay//Western blot	miRTarbase
hsa-miR-141-3p	CDYL	Luciferase reporter assay//Western blot	miRTarbase
hsa-miR-15a-5p	CLCN3	Luciferase reporter assay//Microarray//Northern blot//qRT-PCR//Western blot	miRTarbase
hsa-miR-15a-5p	CRKL	Luciferase reporter assay//Microarray//Northern blot//qRT-PCR//Western blot	miRTarbase
hsa-miR-15a-5p	CRKL	PAR-CLIP	miRTarbase
hsa-miR-15a-5p	MN1	Luciferase reporter assay//Microarray//Northern blot//qRT-PCR//Western blot	miRTarbase
hsa-miR-195-5p	SLC2A3	Luciferase reporter assay//Western blot	miRTarbase
hsa-miR-195-5p	SLC2A3	PAR-CLIP	miRTarbase
hsa-miR-195-5p	SLC2A3	PAR-CLIP	miRTarbase
hsa-miR-195-5p	TBCCD1	Luciferase reporter assay//Western blot	miRTarbase
hsa-miR-195-5p	TBCCD1	HITS-CLIP	miRTarbase
hsa-miR-195-5p	CCND3	Luciferase reporter assay//Western blot	miRTarbase
hsa-miR-195-5p	CCND3	Luciferase reporter assay//Western blot	miRTarbase
hsa-miR-195-5p	CDK4	Luciferase reporter assay	miRTarbase
hsa-miR-195-5p	CDK4	Luciferase reporter assay//Western blot	miRTarbase
hsa-miR-141-3p	ACVR2B	Luciferase reporter assay//Western blot	miRTarbase
hsa-miR-141-3p	MAPK14	Luciferase reporter assay//Microarray//Western blot	miRTarbase
hsa-miR-141-3p	MAPK14	HITS-CLIP	miRTarbase
hsa-miR-141-3p	PPARA	Luciferase reporter assay//qRT-PCR//Western blot	miRTarbase
hsa-miR-141-3p	NR0B2	Luciferase reporter assay	miRTarbase
hsa-miR-141-3p	YWHAG	Luciferase reporter assay//qRT-PCR//Western blot	miRTarbase
hsa-miR-15a-5p	HMGA1	Luciferase reporter assay//qRT-PCR//Western blot	miRTarbase
hsa-miR-15a-5p	HMGA1	HITS-CLIP	miRTarbase
hsa-miR-15a-5p	HMGA2	Luciferase reporter assay//qRT-PCR//Western blot	miRTarbase
hsa-miR-15a-5p	IFNG	Luciferase reporter assay//qRT-PCR	miRTarbase
hsa-miR-195-5p	CDC42	Luciferase reporter assay	miRTarbase
hsa-miR-195-5p	CDC42	Luciferase reporter assay//qRT-PCR//Western blot	miRTarbase
hsa-miR-15a-5p	PURA	Luciferase reporter assay	miRTarbase
hsa-miR-15a-5p	PURA	HITS-CLIP	miRTarbase
hsa-miR-195-5p	CAB39	Immunocytochemistry//In situ hybridization//Northern blot//qRT-PCR//Western blot	miRTarbase
hsa-miR-15a-5p	RECK	GFP reporter assay//qRT-PCR	miRTarbase
hsa-miR-15a-5p	RECK	PAR-CLIP	miRTarbase
hsa-miR-195-5p	CHUK	Luciferase reporter assay	miRTarbase
hsa-miR-195-5p	TAB3	Luciferase reporter assay	miRTarbase
hsa-miR-195-5p	MBD1	Luciferase reporter assay	miRTarbase
hsa-miR-195-5p	CCNE1	Luciferase reporter assay	miRTarbase
hsa-miR-195-5p	CCNE1	Luciferase reporter assay//Western blot	miRTarbase
hsa-miR-195-5p	CCNE1	PAR-CLIP	miRTarbase
hsa-miR-195-5p	CCNE1	PAR-CLIP	miRTarbase
hsa-miR-195-5p	CCNE1	HITS-CLIP	miRTarbase
hsa-miR-195-5p	BCL2L2	Luciferase reporter assay//Western blot	miRTarbase
hsa-miR-141-3p	ELAVL4	qRT-PCR	miRTarbase
hsa-miR-141-3p	MAPK9	Western blot	miRTarbase
hsa-miR-141-3p	TFDP2	Western blot	miRTarbase
hsa-miR-141-3p	E2F3	Western blot	miRTarbase
hsa-miR-141-3p	SHC1	Reporter assay	miRTarbase
hsa-miR-141-3p	VAC14	Reporter assay	miRTarbase
hsa-miR-141-3p	TCF7L1	Reporter assay	miRTarbase
hsa-miR-141-3p	ELMO2	Reporter assay	miRTarbase
hsa-miR-141-3p	RASSF2	Reporter assay	miRTarbase
hsa-miR-141-3p	KLHL20	Reporter assay	miRTarbase
hsa-miR-141-3p	RIN2	Reporter assay	miRTarbase
hsa-miR-141-3p	SEPT7	Reporter assay	miRTarbase
hsa-miR-141-3p	HOXB5	Reporter assay	miRTarbase
hsa-miR-141-3p	ERBB2IP	Reporter assay	miRTarbase
hsa-miR-141-3p	KLF11	Reporter assay	miRTarbase
hsa-miR-141-3p	PTPRD	Reporter assay	miRTarbase
hsa-miR-141-3p	WDR37	Reporter assay	miRTarbase
hsa-miR-15a-5p	DLK1	qRT-PCR;Other	miRTarbase
hsa-miR-15a-3p	LEPROTL1	CLASH	miRTarbase
hsa-miR-15a-3p	RSPO2	CLASH	miRTarbase
hsa-miR-15a-3p	DHX57	CLASH	miRTarbase
hsa-miR-15a-3p	RASAL2	CLASH	miRTarbase
hsa-miR-15a-3p	ND4L	CLASH	miRTarbase
hsa-miR-15a-3p	TFAM	CLASH	miRTarbase
hsa-miR-15a-3p	CNOT6	CLASH	miRTarbase
hsa-miR-486-5p	TMED1	CLASH	miRTarbase
hsa-miR-195-5p	JAK2	CLASH	miRTarbase
hsa-miR-195-5p	CAMKV	CLASH	miRTarbase
hsa-miR-195-5p	AGER	CLASH	miRTarbase
hsa-miR-195-5p	LSM11	PAR-CLIP	miRTarbase
hsa-miR-195-5p	LSM11	HITS-CLIP	miRTarbase
hsa-miR-195-5p	LSM11	CLASH	miRTarbase
hsa-miR-195-5p	ABCB7	CLASH	miRTarbase
hsa-miR-195-5p	ZNF280C	CLASH	miRTarbase
hsa-miR-195-5p	SPTBN1	CLASH	miRTarbase
hsa-miR-195-5p	NOLC1	CLASH	miRTarbase
hsa-miR-195-5p	CAND1	CLASH	miRTarbase
hsa-miR-195-5p	COPB1	CLASH	miRTarbase
hsa-miR-195-5p	RPL10	CLASH	miRTarbase
hsa-miR-195-5p	TMC6	CLASH	miRTarbase
hsa-miR-195-5p	TPI1	CLASH	miRTarbase
hsa-miR-195-5p	SH3BGRL2	CLASH	miRTarbase
hsa-miR-195-5p	AGO1	CLASH	miRTarbase
hsa-miR-15a-5p	PLA2G2D	CLASH	miRTarbase
hsa-miR-15a-5p	ACVR1B	CLASH	miRTarbase
hsa-miR-15a-5p	IKBKG	CLASH	miRTarbase
hsa-miR-15a-5p	GCLM	CLASH	miRTarbase
hsa-miR-15a-5p	PCF11	CLASH	miRTarbase
hsa-miR-15a-5p	HIST1H2BK	CLASH	miRTarbase
hsa-miR-15a-5p	ODC1	CLASH	miRTarbase
hsa-miR-15a-5p	CALD1	CLASH	miRTarbase
hsa-miR-15a-5p	RPP30	CLASH	miRTarbase
hsa-miR-15a-5p	ASNSD1	CLASH	miRTarbase
hsa-miR-15a-5p	CCNYL1	CLASH	miRTarbase
hsa-miR-15a-5p	RGPD5	CLASH	miRTarbase
hsa-miR-15a-5p	PREB	CLASH	miRTarbase
hsa-miR-15a-5p	PDHX	CLASH	miRTarbase
hsa-miR-15a-5p	SNX6	CLASH	miRTarbase
hsa-miR-15a-5p	CNN3	CLASH	miRTarbase
hsa-miR-15a-5p	KIF1A	CLASH	miRTarbase
hsa-miR-15a-5p	NAB1	CLASH	miRTarbase
hsa-miR-15a-5p	CCT6B	CLASH	miRTarbase
hsa-miR-15a-5p	CHD4	CLASH	miRTarbase
hsa-miR-15a-5p	CLCC1	CLASH	miRTarbase
hsa-miR-15a-5p	GDI2	CLASH	miRTarbase
hsa-miR-15a-5p	BRWD1	CLASH	miRTarbase
hsa-miR-15a-5p	MAPK6	CLASH	miRTarbase
hsa-miR-15a-5p	PSMC4	CLASH	miRTarbase
hsa-miR-15a-5p	ATF2	CLASH	miRTarbase
hsa-miR-15a-5p	ATP6AP1	CLASH	miRTarbase
hsa-miR-15a-5p	FBXO3	CLASH	miRTarbase
hsa-miR-15a-5p	PRDX3	CLASH	miRTarbase
hsa-miR-15a-5p	CABIN1	CLASH	miRTarbase
hsa-miR-15a-5p	FASN	PAR-CLIP	miRTarbase
hsa-miR-15a-5p	FASN	PAR-CLIP	miRTarbase
hsa-miR-15a-5p	FASN	CLASH	miRTarbase
hsa-miR-15a-5p	SEC63	CLASH	miRTarbase
hsa-miR-15a-5p	PTAR1	CLASH	miRTarbase
hsa-miR-15a-5p	DSTYK	CLASH	miRTarbase
hsa-miR-15a-5p	FOXO1	Luciferase reporter assay//qRT-PCR//Western blot	miRTarbase
hsa-miR-15a-5p	FOXO1	CLASH	miRTarbase
hsa-miR-15a-5p	TMEM214	CLASH	miRTarbase
hsa-miR-15a-5p	TRIM28	CLASH	miRTarbase
hsa-miR-15a-5p	NOP2	CLASH	miRTarbase
hsa-miR-15a-5p	MYBL1	CLASH	miRTarbase
hsa-miR-15a-5p	TTC1	CLASH	miRTarbase
hsa-miR-15a-5p	BTRC	HITS-CLIP	miRTarbase
hsa-miR-15a-5p	BTRC	CLASH	miRTarbase
hsa-miR-3605-3p	RPLP1	CLASH	miRTarbase
hsa-miR-3605-3p	VIM	CLASH	miRTarbase
hsa-miR-141-3p	STAT4	Luciferase reporter assay//qRT-PCR//Western blot//Immunohistochemistry	miRTarbase
hsa-miR-141-3p	YAP1	Luciferase reporter assay//Western blot	miRTarbase
hsa-miR-15a-5p	REPIN1	Luciferase reporter assay//Western//qRT-PCR	miRTarbase
hsa-miR-15a-5p	KLF4	Western blot	miRTarbase
hsa-miR-141-3p	CDC25C	Luciferase reporter assay//Western blot	miRTarbase
hsa-miR-195-5p	TAR	qRT-PCR//Western blot	miRTarbase
hsa-miR-195-5p	DICER1	qRT-PCR//Western blot	miRTarbase
hsa-miR-195-5p	DICER1	HITS-CLIP	miRTarbase
hsa-miR-195-5p	FASN	Luciferase reporter assay//qRT-PCR//Western blot	miRTarbase
hsa-miR-195-5p	FASN	PAR-CLIP	miRTarbase
hsa-miR-195-5p	FASN	PAR-CLIP	miRTarbase
hsa-miR-486-5p	ARHGAP5	Immunohistochemistry//Luciferase reporter assay//qRT-PCR//Western blot	miRTarbase
hsa-miR-486-3p	BCL11A	Luciferase reporter assay//qRT-PCR//Western blot	miRTarbase
hsa-miR-195-5p	ARL2	Flow//Luciferase reporter assay//Microarray//qRT-PCR//Western blot	miRTarbase
hsa-miR-486-5p	OLFM4	In situ hybridization//Luciferase reporter assay//Microarray//qRT-PCR//Western blot	miRTarbase
hsa-miR-141-3p	HDGF	Luciferase reporter assay//qRT-PCR//Western blot	miRTarbase
hsa-miR-141-3p	KEAP1	Luciferase reporter assay//Microarray//qRT-PCR//Western blot	miRTarbase
hsa-miR-141-3p	KEAP1	Luciferase reporter assay//qRT-PCR//Western blot	miRTarbase
hsa-miR-486-5p	SERPINE1	qRT-PCR	miRTarbase
hsa-miR-141-3p	TAZ	Luciferase reporter assay//Microarray//qRT-PCR//Western blot	miRTarbase
hsa-miR-15a-5p	YAP1	Flow//Luciferase reporter assay//qRT-PCR//Western blot	miRTarbase
hsa-miR-195-5p	BIRC5	Luciferase reporter assay//qRT-PCR	miRTarbase
hsa-miR-195-5p	WNT7A	Luciferase reporter assay//Western blot	miRTarbase
hsa-miR-15a-5p	CARM1	Luciferase reporter assay//qRT-PCR//Western blot	miRTarbase
hsa-miR-141-3p	TIAM1	Luciferase reporter assay//qRT-PCR//Western blot	miRTarbase
hsa-miR-141-3p	TM4SF1	Luciferase reporter assay//qRT-PCR//Western blot	miRTarbase
hsa-miR-141-3p	CDC25A	Luciferase reporter assay//Immunoblot//Western blot	miRTarbase
hsa-miR-141-3p	PHLPP1	Luciferase reporter assay//qRT-PCR	miRTarbase
hsa-miR-141-3p	PHLPP2	Luciferase reporter assay//qRT-PCR	miRTarbase
hsa-miR-195-5p	MYB	Luciferase reporter assay//qRT-PCR//Western blot	miRTarbase
hsa-miR-15a-5p	SOX5	Luciferase reporter assay//Western blot	miRTarbase
hsa-miR-195-5p	ATG14	Immunofluorescence//Luciferase reporter assay//qRT-PCR	miRTarbase
hsa-miR-195-5p	ATG14	PAR-CLIP	miRTarbase
hsa-miR-15a-5p	SHOC2	PAR-CLIP	miRTarbase
hsa-miR-15a-5p	SHOC2	PAR-CLIP	miRTarbase
hsa-miR-15a-5p	SHOC2	HITS-CLIP	miRTarbase
hsa-miR-15a-5p	SHOC2	PAR-CLIP	miRTarbase
hsa-miR-15a-5p	SHOC2	PAR-CLIP	miRTarbase
hsa-miR-15a-5p	SHOC2	PAR-CLIP	miRTarbase
hsa-miR-195-5p	SHOC2	PAR-CLIP	miRTarbase
hsa-miR-195-5p	SHOC2	PAR-CLIP	miRTarbase
hsa-miR-195-5p	SHOC2	HITS-CLIP	miRTarbase
hsa-miR-195-5p	SHOC2	PAR-CLIP	miRTarbase
hsa-miR-195-5p	SHOC2	PAR-CLIP	miRTarbase
hsa-miR-195-5p	SHOC2	PAR-CLIP	miRTarbase
hsa-miR-15a-5p	PLEKHA1	PAR-CLIP	miRTarbase
hsa-miR-195-5p	PLEKHA1	PAR-CLIP	miRTarbase
hsa-miR-3613-3p	OTUD1	PAR-CLIP	miRTarbase
hsa-miR-195-3p	PPIF	PAR-CLIP	miRTarbase
hsa-miR-195-3p	PPIF	PAR-CLIP	miRTarbase
hsa-miR-15a-5p	CEP55	PAR-CLIP	miRTarbase
hsa-miR-15a-5p	CEP55	PAR-CLIP	miRTarbase
hsa-miR-15a-5p	CEP55	PAR-CLIP	miRTarbase
hsa-miR-15a-5p	CEP55	PAR-CLIP	miRTarbase
hsa-miR-195-5p	CEP55	PAR-CLIP	miRTarbase
hsa-miR-195-5p	CEP55	PAR-CLIP	miRTarbase
hsa-miR-195-5p	CEP55	PAR-CLIP	miRTarbase
hsa-miR-195-5p	CEP55	PAR-CLIP	miRTarbase
hsa-miR-3613-5p	LCOR	PAR-CLIP	miRTarbase
hsa-miR-15a-5p	ZDHHC16	PAR-CLIP	miRTarbase
hsa-miR-195-5p	ZDHHC16	PAR-CLIP	miRTarbase
hsa-miR-15a-5p	STXBP3	HITS-CLIP	miRTarbase
hsa-miR-195-5p	STXBP3	HITS-CLIP	miRTarbase
hsa-miR-195-3p	RSBN1	PAR-CLIP	miRTarbase
hsa-miR-195-3p	RSBN1	PAR-CLIP	miRTarbase
hsa-miR-195-3p	RSBN1	PAR-CLIP	miRTarbase
hsa-miR-195-3p	RSBN1	PAR-CLIP	miRTarbase
hsa-miR-15a-5p	C1ORF21	PAR-CLIP	miRTarbase
hsa-miR-15a-5p	C1ORF21	PAR-CLIP	miRTarbase
hsa-miR-15a-5p	C1ORF21	PAR-CLIP	miRTarbase
hsa-miR-195-5p	C1ORF21	PAR-CLIP	miRTarbase
hsa-miR-195-5p	C1ORF21	PAR-CLIP	miRTarbase
hsa-miR-195-5p	C1ORF21	PAR-CLIP	miRTarbase
hsa-miR-15a-5p	AMOTL1	PAR-CLIP	miRTarbase
hsa-miR-15a-5p	AMOTL1	PAR-CLIP//HITS-CLIP	miRTarbase
hsa-miR-15a-5p	AMOTL1	PAR-CLIP	miRTarbase
hsa-miR-15a-5p	AMOTL1	PAR-CLIP	miRTarbase
hsa-miR-15a-5p	AMOTL1	PAR-CLIP	miRTarbase
hsa-miR-15a-5p	AMOTL1	PAR-CLIP	miRTarbase
hsa-miR-195-5p	AMOTL1	PAR-CLIP	miRTarbase
hsa-miR-195-5p	AMOTL1	PAR-CLIP//HITS-CLIP	miRTarbase
hsa-miR-195-5p	AMOTL1	PAR-CLIP	miRTarbase
hsa-miR-195-5p	AMOTL1	PAR-CLIP	miRTarbase
hsa-miR-195-5p	AMOTL1	PAR-CLIP	miRTarbase
hsa-miR-195-5p	AMOTL1	PAR-CLIP	miRTarbase
hsa-miR-15a-5p	BTG2	HITS-CLIP	miRTarbase
hsa-miR-195-5p	BTG2	HITS-CLIP	miRTarbase
hsa-miR-141-3p	PPP1R15B	PAR-CLIP	miRTarbase
hsa-miR-3613-3p	ZNF664	PAR-CLIP	miRTarbase
hsa-miR-3613-3p	ZNF664	PAR-CLIP	miRTarbase
hsa-miR-3613-3p	ZNF664	PAR-CLIP	miRTarbase
hsa-miR-3613-3p	ZNF664	PAR-CLIP	miRTarbase
hsa-miR-15a-5p	ETNK1	HITS-CLIP	miRTarbase
hsa-miR-195-5p	ETNK1	HITS-CLIP	miRTarbase
hsa-miR-195-5p	CCND2	PAR-CLIP	miRTarbase
hsa-miR-195-5p	CCND2	PAR-CLIP	miRTarbase
hsa-miR-3613-3p	CCND2	PAR-CLIP	miRTarbase
hsa-miR-3613-3p	CCND2	PAR-CLIP	miRTarbase
hsa-miR-15a-3p	ZBTB18	PAR-CLIP	miRTarbase
hsa-miR-15a-5p	TARBP2	PAR-CLIP	miRTarbase
hsa-miR-15a-5p	TARBP2	PAR-CLIP	miRTarbase
hsa-miR-195-5p	TARBP2	PAR-CLIP	miRTarbase
hsa-miR-195-5p	TARBP2	PAR-CLIP	miRTarbase
hsa-miR-15a-5p	MTFR1L	PAR-CLIP	miRTarbase
hsa-miR-195-5p	MTFR1L	PAR-CLIP	miRTarbase
hsa-miR-15a-5p	USP15	PAR-CLIP	miRTarbase
hsa-miR-195-5p	USP15	PAR-CLIP	miRTarbase
hsa-miR-15a-5p	AKAP11	HITS-CLIP	miRTarbase
hsa-miR-195-5p	AKAP11	HITS-CLIP	miRTarbase
hsa-miR-219a-1-3p	KPNA3	PAR-CLIP	miRTarbase
hsa-miR-219a-1-3p	KPNA3	HITS-CLIP	miRTarbase
hsa-miR-219a-1-3p	KPNA3	PAR-CLIP	miRTarbase
hsa-miR-3613-3p	SLC39A9	HITS-CLIP	miRTarbase
hsa-miR-15a-5p	FCF1	PAR-CLIP	miRTarbase
hsa-miR-195-5p	FCF1	PAR-CLIP	miRTarbase
hsa-miR-3613-3p	FCF1	PAR-CLIP	miRTarbase
hsa-miR-141-3p	RAB8B	PAR-CLIP	miRTarbase
hsa-miR-15a-5p	ARIH1	PAR-CLIP	miRTarbase
hsa-miR-15a-5p	ARIH1	PAR-CLIP	miRTarbase
hsa-miR-15a-5p	ARIH1	HITS-CLIP	miRTarbase
hsa-miR-195-5p	ARIH1	PAR-CLIP	miRTarbase
hsa-miR-195-5p	ARIH1	PAR-CLIP	miRTarbase
hsa-miR-195-5p	ARIH1	HITS-CLIP	miRTarbase
hsa-miR-195-3p	NFATC2IP	PAR-CLIP	miRTarbase
hsa-miR-195-3p	NFATC2IP	PAR-CLIP	miRTarbase
hsa-miR-15a-5p	PAGR1	PAR-CLIP	miRTarbase
hsa-miR-15a-5p	PAGR1	PAR-CLIP	miRTarbase
hsa-miR-195-5p	PAGR1	PAR-CLIP	miRTarbase
hsa-miR-195-5p	PAGR1	PAR-CLIP	miRTarbase
hsa-miR-15a-5p	SNTB2	PAR-CLIP	miRTarbase
hsa-miR-15a-5p	SNTB2	PAR-CLIP	miRTarbase
hsa-miR-195-5p	SNTB2	PAR-CLIP	miRTarbase
hsa-miR-195-5p	SNTB2	PAR-CLIP	miRTarbase
hsa-miR-15a-5p	VPS4A	PAR-CLIP	miRTarbase
hsa-miR-15a-5p	VPS4A	PAR-CLIP	miRTarbase
hsa-miR-15a-5p	VPS4A	PAR-CLIP	miRTarbase
hsa-miR-15a-5p	VPS4A	PAR-CLIP	miRTarbase
hsa-miR-195-5p	VPS4A	PAR-CLIP	miRTarbase
hsa-miR-195-5p	VPS4A	PAR-CLIP	miRTarbase
hsa-miR-195-5p	VPS4A	PAR-CLIP	miRTarbase
hsa-miR-195-5p	VPS4A	PAR-CLIP	miRTarbase
hsa-miR-15a-5p	C16ORF72	PAR-CLIP//HITS-CLIP	miRTarbase
hsa-miR-15a-5p	C16ORF72	HITS-CLIP	miRTarbase
hsa-miR-15a-5p	C16ORF72	PAR-CLIP	miRTarbase
hsa-miR-15a-5p	C16ORF72	PAR-CLIP	miRTarbase
hsa-miR-195-5p	C16ORF72	PAR-CLIP//HITS-CLIP	miRTarbase
hsa-miR-195-5p	C16ORF72	HITS-CLIP	miRTarbase
hsa-miR-195-5p	C16ORF72	PAR-CLIP	miRTarbase
hsa-miR-195-5p	C16ORF72	PAR-CLIP	miRTarbase
hsa-miR-486-3p	PHF12	PAR-CLIP	miRTarbase
hsa-miR-15a-5p	GOSR1	PAR-CLIP	miRTarbase
hsa-miR-195-5p	GOSR1	PAR-CLIP	miRTarbase
hsa-miR-3613-3p	UBE2Z	PAR-CLIP	miRTarbase
hsa-miR-15a-5p	MINK1	HITS-CLIP	miRTarbase
hsa-miR-195-5p	MINK1	HITS-CLIP	miRTarbase
hsa-miR-15a-5p	RPS6KB1	PAR-CLIP	miRTarbase
hsa-miR-195-5p	RPS6KB1	PAR-CLIP	miRTarbase
hsa-miR-141-3p	MED13	PAR-CLIP	miRTarbase
hsa-miR-3613-3p	MAP3K3	PAR-CLIP	miRTarbase
hsa-miR-3613-3p	BIRC5	PAR-CLIP	miRTarbase
hsa-miR-3613-3p	BIRC5	PAR-CLIP	miRTarbase
hsa-miR-15a-5p	NAPG	PAR-CLIP	miRTarbase
hsa-miR-15a-5p	NAPG	PAR-CLIP//HITS-CLIP	miRTarbase
hsa-miR-15a-5p	NAPG	PAR-CLIP	miRTarbase
hsa-miR-15a-5p	NAPG	PAR-CLIP	miRTarbase
hsa-miR-15a-5p	NAPG	PAR-CLIP	miRTarbase
hsa-miR-15a-5p	NAPG	PAR-CLIP	miRTarbase
hsa-miR-195-5p	NAPG	PAR-CLIP	miRTarbase
hsa-miR-195-5p	NAPG	PAR-CLIP//HITS-CLIP	miRTarbase
hsa-miR-195-5p	NAPG	PAR-CLIP	miRTarbase
hsa-miR-195-5p	NAPG	PAR-CLIP	miRTarbase
hsa-miR-195-5p	NAPG	PAR-CLIP	miRTarbase
hsa-miR-195-5p	NAPG	PAR-CLIP	miRTarbase
hsa-miR-15a-5p	GALNT1	PAR-CLIP	miRTarbase
hsa-miR-15a-5p	GALNT1	PAR-CLIP	miRTarbase
hsa-miR-195-5p	GALNT1	PAR-CLIP	miRTarbase
hsa-miR-195-5p	GALNT1	PAR-CLIP	miRTarbase
hsa-miR-3613-3p	LDLR	PAR-CLIP	miRTarbase
hsa-miR-3613-3p	LDLR	PAR-CLIP	miRTarbase
hsa-miR-3613-3p	LDLR	PAR-CLIP	miRTarbase
hsa-miR-195-3p	ZNF431	PAR-CLIP	miRTarbase
hsa-miR-195-3p	ZNF431	PAR-CLIP	miRTarbase
hsa-miR-486-3p	HNRNPUL1	PAR-CLIP	miRTarbase
hsa-miR-486-3p	HNRNPUL1	PAR-CLIP	miRTarbase
hsa-miR-15a-5p	PNPLA6	PAR-CLIP	miRTarbase
hsa-miR-195-5p	PNPLA6	PAR-CLIP	miRTarbase
hsa-miR-15a-5p	ZCCHC3	PAR-CLIP	miRTarbase
hsa-miR-15a-5p	ZCCHC3	PAR-CLIP	miRTarbase
hsa-miR-15a-5p	ZCCHC3	PAR-CLIP	miRTarbase
hsa-miR-195-5p	ZCCHC3	PAR-CLIP	miRTarbase
hsa-miR-195-5p	ZCCHC3	PAR-CLIP	miRTarbase
hsa-miR-195-5p	ZCCHC3	PAR-CLIP	miRTarbase
hsa-miR-15a-5p	SOWAHC	PAR-CLIP	miRTarbase
hsa-miR-15a-5p	SOWAHC	PAR-CLIP//HITS-CLIP	miRTarbase
hsa-miR-195-5p	SOWAHC	PAR-CLIP	miRTarbase
hsa-miR-195-5p	SOWAHC	PAR-CLIP//HITS-CLIP	miRTarbase
hsa-miR-15a-5p	CCNT2	HITS-CLIP	miRTarbase
hsa-miR-195-5p	CCNT2	HITS-CLIP	miRTarbase
hsa-miR-15a-5p	UBR3	PAR-CLIP//HITS-CLIP	miRTarbase
hsa-miR-195-5p	UBR3	PAR-CLIP//HITS-CLIP	miRTarbase
hsa-miR-15a-5p	ZNRF3	PAR-CLIP	miRTarbase
hsa-miR-195-5p	ZNRF3	PAR-CLIP	miRTarbase
hsa-miR-15a-5p	YWHAH	PAR-CLIP	miRTarbase
hsa-miR-195-5p	YWHAH	PAR-CLIP	miRTarbase
hsa-miR-3613-3p	PTMA	PAR-CLIP	miRTarbase
hsa-miR-3613-3p	PTMA	PAR-CLIP	miRTarbase
hsa-miR-15a-5p	SEPT2	HITS-CLIP	miRTarbase
hsa-miR-195-5p	SEPT2	HITS-CLIP	miRTarbase
hsa-miR-3613-3p	FOXN2	PAR-CLIP	miRTarbase
hsa-miR-3613-3p	FOXN2	PAR-CLIP	miRTarbase
hsa-miR-3613-3p	FOXN2	PAR-CLIP	miRTarbase
hsa-miR-3613-3p	FOXN2	PAR-CLIP	miRTarbase
hsa-miR-3613-3p	FOXN2	PAR-CLIP	miRTarbase
hsa-miR-3613-3p	FOXN2	PAR-CLIP	miRTarbase
hsa-miR-15a-5p	B3GNT2	PAR-CLIP	miRTarbase
hsa-miR-15a-5p	B3GNT2	PAR-CLIP	miRTarbase
hsa-miR-195-5p	B3GNT2	PAR-CLIP	miRTarbase
hsa-miR-195-5p	B3GNT2	PAR-CLIP	miRTarbase
hsa-miR-15a-5p	ACTR2	PAR-CLIP	miRTarbase
hsa-miR-15a-5p	ACTR2	HITS-CLIP	miRTarbase
hsa-miR-195-5p	ACTR2	PAR-CLIP	miRTarbase
hsa-miR-195-5p	ACTR2	HITS-CLIP	miRTarbase
hsa-miR-15a-5p	CDV3	HITS-CLIP	miRTarbase
hsa-miR-195-5p	CDV3	HITS-CLIP	miRTarbase
hsa-miR-15a-5p	U2SURP	HITS-CLIP	miRTarbase
hsa-miR-195-5p	U2SURP	HITS-CLIP	miRTarbase
hsa-miR-15a-5p	RARB	PAR-CLIP	miRTarbase
hsa-miR-15a-5p	RARB	PAR-CLIP	miRTarbase
hsa-miR-15a-5p	RARB	PAR-CLIP	miRTarbase
hsa-miR-195-5p	RARB	PAR-CLIP	miRTarbase
hsa-miR-195-5p	RARB	PAR-CLIP	miRTarbase
hsa-miR-195-5p	RARB	PAR-CLIP	miRTarbase
hsa-miR-15a-5p	ITPR1	HITS-CLIP	miRTarbase
hsa-miR-195-5p	ITPR1	HITS-CLIP	miRTarbase
hsa-miR-15a-5p	BHLHE40	HITS-CLIP	miRTarbase
hsa-miR-195-5p	BHLHE40	HITS-CLIP	miRTarbase
hsa-miR-15a-5p	PI4K2B	PAR-CLIP	miRTarbase
hsa-miR-15a-5p	PI4K2B	PAR-CLIP	miRTarbase
hsa-miR-15a-5p	PI4K2B	PAR-CLIP	miRTarbase
hsa-miR-195-5p	PI4K2B	PAR-CLIP	miRTarbase
hsa-miR-195-5p	PI4K2B	PAR-CLIP	miRTarbase
hsa-miR-195-5p	PI4K2B	PAR-CLIP	miRTarbase
hsa-miR-3613-3p	SH3BP2	HITS-CLIP	miRTarbase
hsa-miR-195-5p	PURA	HITS-CLIP	miRTarbase
hsa-miR-15a-5p	CANX	PAR-CLIP	miRTarbase
hsa-miR-195-5p	CANX	PAR-CLIP	miRTarbase
hsa-miR-3613-3p	CANX	PAR-CLIP	miRTarbase
hsa-miR-195-3p	ERBB2IP	PAR-CLIP	miRTarbase
hsa-miR-3613-3p	MAP7	PAR-CLIP	miRTarbase
hsa-miR-15a-5p	PCMT1	HITS-CLIP	miRTarbase
hsa-miR-195-5p	PCMT1	HITS-CLIP	miRTarbase
hsa-miR-141-3p	QKI	PAR-CLIP	miRTarbase
hsa-miR-486-5p	ID4	PAR-CLIP	miRTarbase
hsa-miR-486-5p	ID4	PAR-CLIP	miRTarbase
hsa-miR-486-5p	ID4	PAR-CLIP	miRTarbase
hsa-miR-15a-5p	E2F3	HITS-CLIP	miRTarbase
hsa-miR-3613-3p	SOX4	PAR-CLIP	miRTarbase
hsa-miR-3613-3p	SOX4	PAR-CLIP	miRTarbase
hsa-miR-3613-3p	SOX4	PAR-CLIP	miRTarbase
hsa-miR-3613-3p	SOX4	PAR-CLIP	miRTarbase
hsa-miR-15a-5p	PPP1R11	HITS-CLIP	miRTarbase
hsa-miR-195-5p	PPP1R11	HITS-CLIP	miRTarbase
hsa-miR-15a-5p	HSPA1B	Luciferase reporter assay	miRTarbase
hsa-miR-15a-5p	HSPA1B	PAR-CLIP	miRTarbase
hsa-miR-15a-5p	HSPA1B	PAR-CLIP	miRTarbase
hsa-miR-15a-5p	HSPA1B	HITS-CLIP	miRTarbase
hsa-miR-15a-5p	HSPA1B	PAR-CLIP	miRTarbase
hsa-miR-195-5p	HSPA1B	PAR-CLIP	miRTarbase
hsa-miR-195-5p	HSPA1B	PAR-CLIP	miRTarbase
hsa-miR-195-5p	HSPA1B	HITS-CLIP	miRTarbase
hsa-miR-195-5p	HSPA1B	PAR-CLIP	miRTarbase
hsa-miR-3613-3p	HSPA1B	PAR-CLIP	miRTarbase
hsa-miR-15a-5p	PIM1	PAR-CLIP	miRTarbase
hsa-miR-195-5p	PIM1	PAR-CLIP	miRTarbase
hsa-miR-15a-5p	CD2AP	PAR-CLIP	miRTarbase
hsa-miR-195-5p	CD2AP	PAR-CLIP	miRTarbase
hsa-miR-15a-5p	CALU	HITS-CLIP	miRTarbase
hsa-miR-15a-5p	CALU	PAR-CLIP	miRTarbase
hsa-miR-195-5p	CALU	HITS-CLIP	miRTarbase
hsa-miR-195-5p	CALU	PAR-CLIP	miRTarbase
hsa-miR-15a-5p	UBN2	PAR-CLIP	miRTarbase
hsa-miR-15a-5p	UBN2	PAR-CLIP	miRTarbase
hsa-miR-15a-5p	UBN2	PAR-CLIP	miRTarbase
hsa-miR-15a-5p	UBN2	HITS-CLIP	miRTarbase
hsa-miR-15a-5p	UBN2	PAR-CLIP	miRTarbase
hsa-miR-15a-5p	UBN2	PAR-CLIP	miRTarbase
hsa-miR-195-5p	UBN2	PAR-CLIP	miRTarbase
hsa-miR-195-5p	UBN2	PAR-CLIP	miRTarbase
hsa-miR-195-5p	UBN2	PAR-CLIP	miRTarbase
hsa-miR-195-5p	UBN2	HITS-CLIP	miRTarbase
hsa-miR-195-5p	UBN2	PAR-CLIP	miRTarbase
hsa-miR-195-5p	UBN2	PAR-CLIP	miRTarbase
hsa-miR-15a-5p	EN2	PAR-CLIP	miRTarbase
hsa-miR-15a-5p	EN2	PAR-CLIP	miRTarbase
hsa-miR-15a-5p	EN2	PAR-CLIP	miRTarbase
hsa-miR-195-5p	EN2	PAR-CLIP	miRTarbase
hsa-miR-195-5p	EN2	PAR-CLIP	miRTarbase
hsa-miR-195-5p	EN2	PAR-CLIP	miRTarbase
hsa-miR-15a-5p	MAFK	PAR-CLIP	miRTarbase
hsa-miR-15a-5p	MAFK	PAR-CLIP	miRTarbase
hsa-miR-15a-5p	MAFK	HITS-CLIP	miRTarbase
hsa-miR-195-5p	MAFK	PAR-CLIP	miRTarbase
hsa-miR-195-5p	MAFK	PAR-CLIP	miRTarbase
hsa-miR-195-5p	MAFK	HITS-CLIP	miRTarbase
hsa-miR-3613-3p	MAFK	PAR-CLIP	miRTarbase
hsa-miR-3613-3p	MAFK	PAR-CLIP	miRTarbase
hsa-miR-3613-3p	CBX3	PAR-CLIP	miRTarbase
hsa-miR-3613-3p	CBX3	HITS-CLIP	miRTarbase
hsa-miR-15a-5p	FOXK1	PAR-CLIP	miRTarbase
hsa-miR-15a-5p	FOXK1	HITS-CLIP	miRTarbase
hsa-miR-195-5p	FOXK1	PAR-CLIP	miRTarbase
hsa-miR-195-5p	FOXK1	HITS-CLIP	miRTarbase
hsa-miR-15a-5p	USP42	PAR-CLIP	miRTarbase
hsa-miR-15a-5p	USP42	PAR-CLIP	miRTarbase
hsa-miR-15a-5p	USP42	PAR-CLIP	miRTarbase
hsa-miR-195-5p	USP42	PAR-CLIP	miRTarbase
hsa-miR-195-5p	USP42	PAR-CLIP	miRTarbase
hsa-miR-195-5p	USP42	PAR-CLIP	miRTarbase
hsa-miR-195-5p	DMTF1	PAR-CLIP	miRTarbase
hsa-miR-195-5p	DMTF1	HITS-CLIP	miRTarbase
hsa-miR-3605-5p	PEG10	PAR-CLIP	miRTarbase
hsa-miR-195-3p	MYC	PAR-CLIP	miRTarbase
hsa-miR-15a-5p	ZFHX4	PAR-CLIP	miRTarbase
hsa-miR-15a-5p	ZFHX4	PAR-CLIP//HITS-CLIP	miRTarbase
hsa-miR-15a-5p	ZFHX4	PAR-CLIP	miRTarbase
hsa-miR-195-5p	ZFHX4	PAR-CLIP	miRTarbase
hsa-miR-195-5p	ZFHX4	PAR-CLIP//HITS-CLIP	miRTarbase
hsa-miR-195-5p	ZFHX4	PAR-CLIP	miRTarbase
hsa-miR-15a-5p	RAD23B	PAR-CLIP	miRTarbase
hsa-miR-15a-5p	RAD23B	HITS-CLIP	miRTarbase
hsa-miR-195-5p	RAD23B	PAR-CLIP	miRTarbase
hsa-miR-195-5p	RAD23B	HITS-CLIP	miRTarbase
hsa-miR-15a-5p	ZBTB34	PAR-CLIP	miRTarbase
hsa-miR-195-5p	ZBTB34	PAR-CLIP	miRTarbase
hsa-miR-195-5p	RECK	PAR-CLIP	miRTarbase
hsa-miR-195-3p	PTAR1	PAR-CLIP	miRTarbase
hsa-miR-195-3p	PTAR1	PAR-CLIP	miRTarbase
hsa-miR-15a-5p	SLC9A6	HITS-CLIP	miRTarbase
hsa-miR-195-5p	SLC9A6	HITS-CLIP	miRTarbase
hsa-miR-15a-5p	ZNF275	PAR-CLIP	miRTarbase
hsa-miR-195-5p	ZNF275	PAR-CLIP	miRTarbase
hsa-miR-195-3p	KLHL15	PAR-CLIP	miRTarbase
hsa-miR-195-3p	KLHL15	PAR-CLIP	miRTarbase
hsa-miR-195-3p	KLHL15	PAR-CLIP	miRTarbase
hsa-miR-15a-5p	OGT	PAR-CLIP	miRTarbase
hsa-miR-15a-5p	OGT	PAR-CLIP	miRTarbase
hsa-miR-15a-5p	OGT	HITS-CLIP	miRTarbase
hsa-miR-15a-5p	OGT	PAR-CLIP	miRTarbase
hsa-miR-195-5p	OGT	PAR-CLIP	miRTarbase
hsa-miR-195-5p	OGT	PAR-CLIP	miRTarbase
hsa-miR-195-5p	OGT	HITS-CLIP	miRTarbase
hsa-miR-195-5p	OGT	PAR-CLIP	miRTarbase
hsa-miR-486-3p	OGT	PAR-CLIP	miRTarbase
hsa-miR-486-3p	OGT	PAR-CLIP	miRTarbase
hsa-miR-486-3p	OGT	PAR-CLIP	miRTarbase
hsa-miR-3613-3p	FDX1	HITS-CLIP	miRTarbase
hsa-miR-219a-1-3p	BTG2	PAR-CLIP	miRTarbase
hsa-miR-15a-5p	LUZP1	PAR-CLIP	miRTarbase
hsa-miR-15a-5p	LUZP1	PAR-CLIP	miRTarbase
hsa-miR-15a-5p	LUZP1	PAR-CLIP	miRTarbase
hsa-miR-195-5p	LUZP1	PAR-CLIP	miRTarbase
hsa-miR-195-5p	LUZP1	PAR-CLIP	miRTarbase
hsa-miR-195-5p	LUZP1	PAR-CLIP	miRTarbase
hsa-miR-3613-3p	CFL2	PAR-CLIP	miRTarbase
hsa-miR-141-5p	ZFYVE9	PAR-CLIP	miRTarbase
hsa-miR-15a-5p	CHAC1	PAR-CLIP	miRTarbase
hsa-miR-195-5p	CHAC1	PAR-CLIP	miRTarbase
hsa-miR-141-3p	ADNP2	HITS-CLIP	miRTarbase
hsa-miR-15a-5p	SCAMP4	PAR-CLIP	miRTarbase
hsa-miR-195-5p	SCAMP4	PAR-CLIP	miRTarbase
hsa-miR-3613-3p	BTBD3	PAR-CLIP	miRTarbase
hsa-miR-3613-3p	BTBD3	PAR-CLIP//HITS-CLIP	miRTarbase
hsa-miR-3613-3p	BTBD3	PAR-CLIP	miRTarbase
hsa-miR-3613-3p	BTBD3	PAR-CLIP	miRTarbase
hsa-miR-3613-3p	BTBD3	PAR-CLIP	miRTarbase
hsa-miR-3613-3p	BTBD3	PAR-CLIP	miRTarbase
hsa-miR-3613-3p	MAVS	PAR-CLIP	miRTarbase
hsa-miR-3613-3p	MAVS	PAR-CLIP	miRTarbase
hsa-miR-219a-1-3p	NCOA3	PAR-CLIP	miRTarbase
hsa-miR-15a-5p	PAK2	PAR-CLIP	miRTarbase
hsa-miR-195-5p	PAK2	PAR-CLIP	miRTarbase
hsa-miR-3605-5p	GINS4	PAR-CLIP	miRTarbase
hsa-miR-3605-5p	GINS4	PAR-CLIP	miRTarbase
hsa-miR-3605-3p	GINS4	PAR-CLIP	miRTarbase
hsa-miR-3605-3p	GINS4	PAR-CLIP	miRTarbase
hsa-miR-195-5p	PDCD4	HITS-CLIP	miRTarbase
hsa-miR-141-3p	ARL5B	PAR-CLIP	miRTarbase
hsa-miR-141-3p	ARL5B	PAR-CLIP	miRTarbase
hsa-miR-141-3p	ARL5B	PAR-CLIP	miRTarbase
hsa-miR-141-3p	ARL5B	PAR-CLIP	miRTarbase
hsa-miR-141-3p	ARL5B	PAR-CLIP	miRTarbase
hsa-miR-141-3p	TNKS2	PAR-CLIP	miRTarbase
hsa-miR-15a-5p	ENTPD1	PAR-CLIP	miRTarbase
hsa-miR-15a-5p	ENTPD1	HITS-CLIP	miRTarbase
hsa-miR-195-5p	ENTPD1	PAR-CLIP	miRTarbase
hsa-miR-195-5p	ENTPD1	HITS-CLIP	miRTarbase
hsa-miR-15a-5p	UBE4A	HITS-CLIP	miRTarbase
hsa-miR-195-5p	UBE4A	HITS-CLIP	miRTarbase
hsa-miR-15a-5p	ARCN1	HITS-CLIP	miRTarbase
hsa-miR-195-5p	ARCN1	HITS-CLIP	miRTarbase
hsa-miR-15a-5p	PTPRJ	HITS-CLIP	miRTarbase
hsa-miR-195-5p	PTPRJ	HITS-CLIP	miRTarbase
hsa-miR-15a-5p	TMEM138	HITS-CLIP	miRTarbase
hsa-miR-195-5p	TMEM138	HITS-CLIP	miRTarbase
hsa-miR-15a-5p	RASSF5	HITS-CLIP	miRTarbase
hsa-miR-195-5p	RASSF5	HITS-CLIP	miRTarbase
hsa-miR-15a-5p	MAPKAPK2	HITS-CLIP	miRTarbase
hsa-miR-195-5p	MAPKAPK2	HITS-CLIP	miRTarbase
hsa-miR-15a-5p	BCL7A	HITS-CLIP	miRTarbase
hsa-miR-195-5p	BCL7A	HITS-CLIP	miRTarbase
hsa-miR-15a-5p	SKI	PAR-CLIP	miRTarbase
hsa-miR-15a-5p	SKI	HITS-CLIP	miRTarbase
hsa-miR-141-3p	SPRYD4	PAR-CLIP	miRTarbase
hsa-miR-15a-5p	RCOR1	HITS-CLIP	miRTarbase
hsa-miR-195-5p	RCOR1	HITS-CLIP	miRTarbase
hsa-miR-3613-3p	BTF3L4	PAR-CLIP	miRTarbase
hsa-miR-15a-5p	SPRED1	HITS-CLIP	miRTarbase
hsa-miR-15a-5p	SPRED1	PAR-CLIP	miRTarbase
hsa-miR-195-5p	SPRED1	HITS-CLIP	miRTarbase
hsa-miR-195-5p	SPRED1	PAR-CLIP	miRTarbase
hsa-miR-15a-5p	SMAD3	HITS-CLIP	miRTarbase
hsa-miR-195-5p	SMAD3	HITS-CLIP	miRTarbase
hsa-miR-15a-5p	SCAMP5	HITS-CLIP	miRTarbase
hsa-miR-195-5p	SCAMP5	HITS-CLIP	miRTarbase
hsa-miR-15a-5p	UBE2Q2	HITS-CLIP	miRTarbase
hsa-miR-195-5p	UBE2Q2	HITS-CLIP	miRTarbase
hsa-miR-15a-5p	DCTN5	PAR-CLIP	miRTarbase
hsa-miR-15a-5p	DCTN5	PAR-CLIP	miRTarbase
hsa-miR-15a-5p	DCTN5	HITS-CLIP	miRTarbase
hsa-miR-15a-5p	DCTN5	PAR-CLIP	miRTarbase
hsa-miR-15a-5p	DCTN5	PAR-CLIP	miRTarbase
hsa-miR-195-5p	DCTN5	PAR-CLIP	miRTarbase
hsa-miR-195-5p	DCTN5	PAR-CLIP	miRTarbase
hsa-miR-195-5p	DCTN5	HITS-CLIP	miRTarbase
hsa-miR-195-5p	DCTN5	PAR-CLIP	miRTarbase
hsa-miR-195-5p	DCTN5	PAR-CLIP	miRTarbase
hsa-miR-15a-5p	PSKH1	HITS-CLIP	miRTarbase
hsa-miR-195-5p	PSKH1	HITS-CLIP	miRTarbase
hsa-miR-15a-5p	ANKRD13B	HITS-CLIP	miRTarbase
hsa-miR-195-5p	ANKRD13B	HITS-CLIP	miRTarbase
hsa-miR-15a-5p	EZH1	HITS-CLIP	miRTarbase
hsa-miR-195-5p	EZH1	HITS-CLIP	miRTarbase
hsa-miR-3613-3p	GPATCH8	PAR-CLIP	miRTarbase
hsa-miR-15a-5p	PNPO	HITS-CLIP	miRTarbase
hsa-miR-195-5p	PNPO	HITS-CLIP	miRTarbase
hsa-miR-15a-5p	SNX11	HITS-CLIP	miRTarbase
hsa-miR-195-5p	SNX11	HITS-CLIP	miRTarbase
hsa-miR-3613-3p	FOXK2	HITS-CLIP	miRTarbase
hsa-miR-15a-5p	RNF138	HITS-CLIP	miRTarbase
hsa-miR-195-5p	RNF138	HITS-CLIP	miRTarbase
hsa-miR-15a-5p	IER2	HITS-CLIP	miRTarbase
hsa-miR-195-5p	IER2	HITS-CLIP	miRTarbase
hsa-miR-15a-5p	TNFSF9	HITS-CLIP	miRTarbase
hsa-miR-15a-5p	TNFSF9	PAR-CLIP	miRTarbase
hsa-miR-195-5p	TNFSF9	HITS-CLIP	miRTarbase
hsa-miR-195-5p	TNFSF9	PAR-CLIP	miRTarbase
hsa-miR-15a-5p	ENTPD6	HITS-CLIP	miRTarbase
hsa-miR-195-5p	ENTPD6	HITS-CLIP	miRTarbase
hsa-miR-3613-3p	PLAGL2	PAR-CLIP	miRTarbase
hsa-miR-15a-5p	KIF3B	HITS-CLIP	miRTarbase
hsa-miR-195-5p	KIF3B	HITS-CLIP	miRTarbase
hsa-miR-15a-5p	NOL4L	HITS-CLIP	miRTarbase
hsa-miR-195-5p	NOL4L	HITS-CLIP	miRTarbase
hsa-miR-15a-5p	RASSF2	PAR-CLIP	miRTarbase
hsa-miR-195-5p	RASSF2	PAR-CLIP	miRTarbase
hsa-miR-15a-5p	CDS2	HITS-CLIP	miRTarbase
hsa-miR-195-5p	CDS2	HITS-CLIP	miRTarbase
hsa-miR-15a-5p	ATP5G3	PAR-CLIP	miRTarbase
hsa-miR-195-5p	ATP5G3	PAR-CLIP	miRTarbase
hsa-miR-15a-5p	TNRC6B	HITS-CLIP	miRTarbase
hsa-miR-15a-5p	TNRC6B	HITS-CLIP	miRTarbase
hsa-miR-15a-5p	TNRC6B	HITS-CLIP	miRTarbase
hsa-miR-195-5p	TNRC6B	HITS-CLIP	miRTarbase
hsa-miR-195-5p	TNRC6B	HITS-CLIP	miRTarbase
hsa-miR-195-5p	TNRC6B	HITS-CLIP	miRTarbase
hsa-miR-15a-5p	EPT1	HITS-CLIP	miRTarbase
hsa-miR-195-5p	EPT1	HITS-CLIP	miRTarbase
hsa-miR-15a-5p	PEX13	HITS-CLIP	miRTarbase
hsa-miR-195-5p	PEX13	HITS-CLIP	miRTarbase
hsa-miR-15a-5p	TET3	HITS-CLIP	miRTarbase
hsa-miR-195-5p	TET3	HITS-CLIP	miRTarbase
hsa-miR-3613-3p	TET3	PAR-CLIP	miRTarbase
hsa-miR-3613-3p	CDV3	HITS-CLIP	miRTarbase
hsa-miR-3613-3p	CDV3	PAR-CLIP	miRTarbase
hsa-miR-15a-5p	PRKCD	HITS-CLIP	miRTarbase
hsa-miR-195-5p	PRKCD	HITS-CLIP	miRTarbase
hsa-miR-15a-5p	CPEB2	HITS-CLIP	miRTarbase
hsa-miR-195-5p	CPEB2	HITS-CLIP	miRTarbase
hsa-miR-15a-5p	TADA2B	HITS-CLIP	miRTarbase
hsa-miR-195-5p	TADA2B	HITS-CLIP	miRTarbase
hsa-miR-15a-5p	GRAMD3	HITS-CLIP	miRTarbase
hsa-miR-15a-5p	GRAMD3	HITS-CLIP	miRTarbase
hsa-miR-141-5p	GRAMD3	HITS-CLIP	miRTarbase
hsa-miR-195-5p	GRAMD3	HITS-CLIP	miRTarbase
hsa-miR-195-5p	GRAMD3	HITS-CLIP	miRTarbase
hsa-miR-15a-5p	CREBRF	HITS-CLIP	miRTarbase
hsa-miR-15a-5p	CREBRF	PAR-CLIP	miRTarbase
hsa-miR-195-5p	CREBRF	HITS-CLIP	miRTarbase
hsa-miR-195-5p	CREBRF	PAR-CLIP	miRTarbase
hsa-miR-195-3p	PAPD7	PAR-CLIP	miRTarbase
hsa-miR-195-3p	PAPD7	PAR-CLIP	miRTarbase
hsa-miR-195-3p	PAPD7	PAR-CLIP	miRTarbase
hsa-miR-3613-3p	TNPO1	HITS-CLIP	miRTarbase
hsa-miR-195-5p	HMGA1	HITS-CLIP	miRTarbase
hsa-miR-15a-5p	CDKN1A	HITS-CLIP	miRTarbase
hsa-miR-195-5p	CDKN1A	HITS-CLIP	miRTarbase
hsa-miR-15a-5p	IRF4	HITS-CLIP	miRTarbase
hsa-miR-195-5p	IRF4	HITS-CLIP	miRTarbase
hsa-miR-141-5p	VEGFA	HITS-CLIP	miRTarbase
hsa-miR-15a-5p	KLHDC10	HITS-CLIP	miRTarbase
hsa-miR-195-5p	KLHDC10	HITS-CLIP	miRTarbase
hsa-miR-15a-5p	UBE3C	HITS-CLIP	miRTarbase
hsa-miR-195-5p	UBE3C	HITS-CLIP	miRTarbase
hsa-miR-195-3p	YWHAG	PAR-CLIP	miRTarbase
hsa-miR-15a-5p	SUN1	HITS-CLIP	miRTarbase
hsa-miR-195-5p	SUN1	HITS-CLIP	miRTarbase
hsa-miR-15a-5p	HMBOX1	HITS-CLIP	miRTarbase
hsa-miR-195-5p	HMBOX1	HITS-CLIP	miRTarbase
hsa-miR-15a-5p	RNF38	HITS-CLIP	miRTarbase
hsa-miR-195-5p	RNF38	HITS-CLIP	miRTarbase
hsa-miR-3613-3p	RNF38	HITS-CLIP	miRTarbase
hsa-miR-15a-5p	PSAT1	PAR-CLIP	miRTarbase
hsa-miR-15a-5p	PSAT1	PAR-CLIP	miRTarbase
hsa-miR-15a-5p	PSAT1	HITS-CLIP	miRTarbase
hsa-miR-15a-5p	PSAT1	PAR-CLIP	miRTarbase
hsa-miR-195-5p	PSAT1	PAR-CLIP	miRTarbase
hsa-miR-195-5p	PSAT1	PAR-CLIP	miRTarbase
hsa-miR-195-5p	PSAT1	HITS-CLIP	miRTarbase
hsa-miR-195-5p	PSAT1	PAR-CLIP	miRTarbase
hsa-miR-15a-5p	ZBTB33	HITS-CLIP	miRTarbase
hsa-miR-195-5p	ZBTB33	HITS-CLIP	miRTarbase
hsa-miR-141-3p	OGT	PAR-CLIP	miRTarbase
hsa-miR-141-3p	OGT	PAR-CLIP	miRTarbase
hsa-miR-141-3p	PGK1	PAR-CLIP	miRTarbase
hsa-miR-3613-5p	SMC3	PAR-CLIP	miRTarbase
hsa-miR-219a-1-3p	UBE2D1	PAR-CLIP	miRTarbase
hsa-miR-219a-1-3p	UBE2D1	PAR-CLIP	miRTarbase
hsa-miR-219a-1-3p	UBE2D1	PAR-CLIP	miRTarbase
hsa-miR-15a-5p	PAFAH1B2	PAR-CLIP	miRTarbase
hsa-miR-195-5p	PAFAH1B2	PAR-CLIP	miRTarbase
hsa-miR-3613-3p	PAFAH1B2	PAR-CLIP	miRTarbase
hsa-miR-3613-3p	PAFAH1B2	PAR-CLIP	miRTarbase
hsa-miR-3613-3p	SIKE1	PAR-CLIP	miRTarbase
hsa-miR-15a-5p	RPRD2	PAR-CLIP	miRTarbase
hsa-miR-15a-5p	RPRD2	PAR-CLIP	miRTarbase
hsa-miR-15a-5p	RPRD2	PAR-CLIP	miRTarbase
hsa-miR-15a-5p	RPRD2	PAR-CLIP	miRTarbase
hsa-miR-195-5p	RPRD2	PAR-CLIP	miRTarbase
hsa-miR-195-5p	RPRD2	PAR-CLIP	miRTarbase
hsa-miR-195-5p	RPRD2	PAR-CLIP	miRTarbase
hsa-miR-195-5p	RPRD2	PAR-CLIP	miRTarbase
hsa-miR-3613-3p	ADIPOR2	HITS-CLIP	miRTarbase
hsa-miR-3613-3p	ZNF678	PAR-CLIP	miRTarbase
hsa-miR-15a-5p	PNRC2	PAR-CLIP	miRTarbase
hsa-miR-195-5p	PNRC2	PAR-CLIP	miRTarbase
hsa-miR-3613-3p	RAP1B	PAR-CLIP	miRTarbase
hsa-miR-3605-5p	TXLNA	PAR-CLIP	miRTarbase
hsa-miR-3605-5p	TXLNA	PAR-CLIP	miRTarbase
hsa-miR-15a-5p	CDADC1	PAR-CLIP	miRTarbase
hsa-miR-195-5p	CDADC1	PAR-CLIP	miRTarbase
hsa-miR-15a-5p	AGO4	PAR-CLIP	miRTarbase
hsa-miR-195-5p	AGO4	PAR-CLIP	miRTarbase
hsa-miR-15a-5p	GPR180	PAR-CLIP	miRTarbase
hsa-miR-15a-5p	GPR180	PAR-CLIP	miRTarbase
hsa-miR-15a-5p	GPR180	PAR-CLIP	miRTarbase
hsa-miR-195-5p	GPR180	PAR-CLIP	miRTarbase
hsa-miR-195-5p	GPR180	PAR-CLIP	miRTarbase
hsa-miR-195-5p	GPR180	PAR-CLIP	miRTarbase
hsa-miR-3613-3p	EXOC5	HITS-CLIP	miRTarbase
hsa-miR-15a-5p	PPM1A	PAR-CLIP	miRTarbase
hsa-miR-195-5p	PPM1A	PAR-CLIP	miRTarbase
hsa-miR-15a-5p	SLC39A9	PAR-CLIP	miRTarbase
hsa-miR-15a-5p	SLC39A9	PAR-CLIP	miRTarbase
hsa-miR-15a-5p	SLC39A9	PAR-CLIP	miRTarbase
hsa-miR-195-5p	SLC39A9	PAR-CLIP	miRTarbase
hsa-miR-195-5p	SLC39A9	PAR-CLIP	miRTarbase
hsa-miR-195-5p	SLC39A9	PAR-CLIP	miRTarbase
hsa-miR-3613-3p	ELMSAN1	HITS-CLIP	miRTarbase
hsa-miR-195-3p	B2M	PAR-CLIP	miRTarbase
hsa-miR-15a-5p	FAM103A1	PAR-CLIP	miRTarbase
hsa-miR-15a-5p	FAM103A1	PAR-CLIP	miRTarbase
hsa-miR-15a-5p	FAM103A1	PAR-CLIP	miRTarbase
hsa-miR-195-5p	FAM103A1	PAR-CLIP	miRTarbase
hsa-miR-195-5p	FAM103A1	PAR-CLIP	miRTarbase
hsa-miR-195-5p	FAM103A1	PAR-CLIP	miRTarbase
hsa-miR-15a-5p	RBBP6	PAR-CLIP	miRTarbase
hsa-miR-15a-5p	RBBP6	PAR-CLIP	miRTarbase
hsa-miR-15a-5p	RBBP6	PAR-CLIP	miRTarbase
hsa-miR-15a-5p	RBBP6	PAR-CLIP	miRTarbase
hsa-miR-195-5p	RBBP6	PAR-CLIP	miRTarbase
hsa-miR-195-5p	RBBP6	PAR-CLIP	miRTarbase
hsa-miR-195-5p	RBBP6	PAR-CLIP	miRTarbase
hsa-miR-195-5p	RBBP6	PAR-CLIP	miRTarbase
hsa-miR-195-3p	RBBP6	PAR-CLIP	miRTarbase
hsa-miR-195-3p	RBBP6	PAR-CLIP	miRTarbase
hsa-miR-195-3p	RBBP6	PAR-CLIP	miRTarbase
hsa-miR-195-3p	RBBP6	PAR-CLIP	miRTarbase
hsa-miR-3613-3p	GADD45A	PAR-CLIP	miRTarbase
hsa-miR-15a-5p	PAFAH1B1	HITS-CLIP	miRTarbase
hsa-miR-195-5p	PAFAH1B1	HITS-CLIP	miRTarbase
hsa-miR-15a-5p	TAOK1	PAR-CLIP	miRTarbase
hsa-miR-195-5p	TAOK1	PAR-CLIP	miRTarbase
hsa-miR-3613-3p	C18ORF25	PAR-CLIP	miRTarbase
hsa-miR-15a-5p	SNRPB2	PAR-CLIP	miRTarbase
hsa-miR-15a-5p	SNRPB2	PAR-CLIP	miRTarbase
hsa-miR-15a-5p	SNRPB2	PAR-CLIP	miRTarbase
hsa-miR-15a-5p	SNRPB2	PAR-CLIP	miRTarbase
hsa-miR-195-5p	SNRPB2	PAR-CLIP	miRTarbase
hsa-miR-195-5p	SNRPB2	PAR-CLIP	miRTarbase
hsa-miR-195-5p	SNRPB2	PAR-CLIP	miRTarbase
hsa-miR-195-5p	SNRPB2	PAR-CLIP	miRTarbase
hsa-miR-15a-3p	ZSWIM1	PAR-CLIP	miRTarbase
hsa-miR-3613-3p	CEBPB	PAR-CLIP	miRTarbase
hsa-miR-15a-5p	HSPE1-MOB4	PAR-CLIP	miRTarbase
hsa-miR-15a-5p	HSPE1-MOB4	PAR-CLIP	miRTarbase
hsa-miR-15a-5p	HSPE1-MOB4	PAR-CLIP	miRTarbase
hsa-miR-15a-5p	HSPE1-MOB4	PAR-CLIP	miRTarbase
hsa-miR-195-5p	HSPE1-MOB4	PAR-CLIP	miRTarbase
hsa-miR-195-5p	HSPE1-MOB4	PAR-CLIP	miRTarbase
hsa-miR-195-5p	HSPE1-MOB4	PAR-CLIP	miRTarbase
hsa-miR-195-5p	HSPE1-MOB4	PAR-CLIP	miRTarbase
hsa-miR-15a-5p	MOB4	PAR-CLIP	miRTarbase
hsa-miR-15a-5p	MOB4	PAR-CLIP	miRTarbase
hsa-miR-15a-5p	MOB4	PAR-CLIP	miRTarbase
hsa-miR-15a-5p	MOB4	PAR-CLIP	miRTarbase
hsa-miR-195-5p	MOB4	PAR-CLIP	miRTarbase
hsa-miR-195-5p	MOB4	PAR-CLIP	miRTarbase
hsa-miR-195-5p	MOB4	PAR-CLIP	miRTarbase
hsa-miR-195-5p	MOB4	PAR-CLIP	miRTarbase
hsa-miR-15a-5p	BZW1	PAR-CLIP	miRTarbase
hsa-miR-15a-5p	BZW1	PAR-CLIP	miRTarbase
hsa-miR-15a-5p	BZW1	PAR-CLIP	miRTarbase
hsa-miR-15a-5p	BZW1	PAR-CLIP	miRTarbase
hsa-miR-15a-5p	BZW1	PAR-CLIP	miRTarbase
hsa-miR-15a-5p	BZW1	PAR-CLIP	miRTarbase
hsa-miR-195-5p	BZW1	PAR-CLIP	miRTarbase
hsa-miR-195-5p	BZW1	PAR-CLIP	miRTarbase
hsa-miR-195-5p	BZW1	PAR-CLIP	miRTarbase
hsa-miR-195-5p	BZW1	PAR-CLIP	miRTarbase
hsa-miR-195-5p	BZW1	PAR-CLIP	miRTarbase
hsa-miR-195-5p	BZW1	PAR-CLIP	miRTarbase
hsa-miR-15a-5p	NUP50	PAR-CLIP	miRTarbase
hsa-miR-15a-5p	NUP50	PAR-CLIP	miRTarbase
hsa-miR-15a-5p	NUP50	HITS-CLIP	miRTarbase
hsa-miR-15a-5p	NUP50	PAR-CLIP	miRTarbase
hsa-miR-195-5p	NUP50	PAR-CLIP	miRTarbase
hsa-miR-195-5p	NUP50	PAR-CLIP	miRTarbase
hsa-miR-195-5p	NUP50	HITS-CLIP	miRTarbase
hsa-miR-195-5p	NUP50	PAR-CLIP	miRTarbase
hsa-miR-3613-3p	SKIL	PAR-CLIP	miRTarbase
hsa-miR-3613-3p	SKIL	PAR-CLIP	miRTarbase
hsa-miR-3613-3p	SKIL	PAR-CLIP	miRTarbase
hsa-miR-3613-3p	SKIL	HITS-CLIP	miRTarbase
hsa-miR-3613-3p	SKIL	PAR-CLIP	miRTarbase
hsa-miR-3613-3p	TBL1XR1	PAR-CLIP	miRTarbase
hsa-miR-3613-3p	ZMAT3	PAR-CLIP	miRTarbase
hsa-miR-3613-3p	ZMAT3	PAR-CLIP	miRTarbase
hsa-miR-3613-3p	ZMAT3	PAR-CLIP	miRTarbase
hsa-miR-3613-3p	ZMAT3	PAR-CLIP	miRTarbase
hsa-miR-15a-5p	FGF2	PAR-CLIP	miRTarbase
hsa-miR-15a-5p	FGF2	PAR-CLIP	miRTarbase
hsa-miR-195-5p	FGF2	PAR-CLIP	miRTarbase
hsa-miR-195-5p	FGF2	PAR-CLIP	miRTarbase
hsa-miR-15a-5p	HSPA4L	PAR-CLIP	miRTarbase
hsa-miR-15a-5p	HSPA4L	PAR-CLIP	miRTarbase
hsa-miR-195-5p	HSPA4L	PAR-CLIP	miRTarbase
hsa-miR-195-5p	HSPA4L	PAR-CLIP	miRTarbase
hsa-miR-15a-5p	RBPJ	PAR-CLIP	miRTarbase
hsa-miR-15a-5p	RBPJ	PAR-CLIP	miRTarbase
hsa-miR-15a-5p	RBPJ	PAR-CLIP	miRTarbase
hsa-miR-15a-5p	RBPJ	PAR-CLIP	miRTarbase
hsa-miR-195-5p	RBPJ	PAR-CLIP	miRTarbase
hsa-miR-195-5p	RBPJ	PAR-CLIP	miRTarbase
hsa-miR-195-5p	RBPJ	PAR-CLIP	miRTarbase
hsa-miR-195-5p	RBPJ	PAR-CLIP	miRTarbase
hsa-miR-3613-3p	DCP2	PAR-CLIP	miRTarbase
hsa-miR-195-3p	SUB1	PAR-CLIP	miRTarbase
hsa-miR-219a-1-3p	C5ORF51	PAR-CLIP	miRTarbase
hsa-miR-219a-1-3p	C5ORF51	PAR-CLIP	miRTarbase
hsa-miR-219a-1-3p	C5ORF51	PAR-CLIP	miRTarbase
hsa-miR-219a-1-3p	C5ORF51	PAR-CLIP	miRTarbase
hsa-miR-219a-1-3p	C5ORF51	PAR-CLIP	miRTarbase
hsa-miR-3613-3p	MTX3	HITS-CLIP	miRTarbase
hsa-miR-15a-5p	TBPL1	PAR-CLIP	miRTarbase
hsa-miR-15a-5p	TBPL1	HITS-CLIP	miRTarbase
hsa-miR-195-5p	TBPL1	PAR-CLIP	miRTarbase
hsa-miR-195-5p	TBPL1	HITS-CLIP	miRTarbase
hsa-miR-219a-1-3p	C6ORF120	PAR-CLIP	miRTarbase
hsa-miR-486-5p	PIM1	qRT-PCR	miRTarbase
hsa-miR-195-3p	ATP6V1C1	PAR-CLIP	miRTarbase
hsa-miR-195-3p	ATP6V1C1	PAR-CLIP	miRTarbase
hsa-miR-15a-5p	FZD6	PAR-CLIP	miRTarbase
hsa-miR-15a-5p	FZD6	HITS-CLIP	miRTarbase
hsa-miR-15a-5p	FZD6	PAR-CLIP	miRTarbase
hsa-miR-195-5p	FZD6	PAR-CLIP	miRTarbase
hsa-miR-195-5p	FZD6	HITS-CLIP	miRTarbase
hsa-miR-195-5p	FZD6	PAR-CLIP	miRTarbase
hsa-miR-15a-5p	BAG4	PAR-CLIP	miRTarbase
hsa-miR-195-5p	BAG4	PAR-CLIP	miRTarbase
hsa-miR-3613-5p	ANP32B	PAR-CLIP	miRTarbase
hsa-miR-3613-5p	ANP32B	PAR-CLIP	miRTarbase
hsa-miR-141-3p	ZBTB34	PAR-CLIP	miRTarbase
hsa-miR-15a-5p	ZNF449	PAR-CLIP	miRTarbase
hsa-miR-195-5p	ZNF449	PAR-CLIP	miRTarbase
hsa-miR-3613-3p	EIF2S3	HITS-CLIP	miRTarbase
hsa-miR-15a-5p	YIPF6	PAR-CLIP	miRTarbase
hsa-miR-195-5p	YIPF6	PAR-CLIP	miRTarbase
hsa-miR-15a-5p	DDX3Y	HITS-CLIP	miRTarbase
hsa-miR-195-5p	DDX3Y	HITS-CLIP	miRTarbase
hsa-miR-3613-3p	EIF4G3	HITS-CLIP	miRTarbase
hsa-miR-15a-5p	MSL1	PAR-CLIP	miRTarbase
hsa-miR-15a-5p	MSL1	PAR-CLIP	miRTarbase
hsa-miR-15a-5p	MSL1	PAR-CLIP	miRTarbase
hsa-miR-15a-5p	MSL1	HITS-CLIP	miRTarbase
hsa-miR-195-5p	MSL1	PAR-CLIP	miRTarbase
hsa-miR-195-5p	MSL1	PAR-CLIP	miRTarbase
hsa-miR-195-5p	MSL1	PAR-CLIP	miRTarbase
hsa-miR-195-5p	MSL1	HITS-CLIP	miRTarbase
hsa-miR-195-3p	AMOTL1	PAR-CLIP	miRTarbase
hsa-miR-195-3p	AMOTL1	PAR-CLIP	miRTarbase
hsa-miR-3613-3p	TMC5	PAR-CLIP	miRTarbase
hsa-miR-3613-3p	TMC5	HITS-CLIP	miRTarbase
hsa-miR-3613-3p	MCM4	PAR-CLIP	miRTarbase
hsa-miR-15a-5p	ENTPD7	HITS-CLIP	miRTarbase
hsa-miR-195-5p	ENTPD7	HITS-CLIP	miRTarbase
hsa-miR-15a-5p	PRRC2C	HITS-CLIP	miRTarbase
hsa-miR-195-5p	PRRC2C	HITS-CLIP	miRTarbase
hsa-miR-15a-5p	WEE1	PAR-CLIP	miRTarbase
hsa-miR-15a-5p	WEE1	PAR-CLIP	miRTarbase
hsa-miR-15a-5p	ELK4	PAR-CLIP	miRTarbase
hsa-miR-15a-5p	ELK4	PAR-CLIP	miRTarbase
hsa-miR-195-5p	ELK4	PAR-CLIP	miRTarbase
hsa-miR-195-5p	ELK4	PAR-CLIP	miRTarbase
hsa-miR-15a-5p	GABARAPL1	PAR-CLIP	miRTarbase
hsa-miR-15a-5p	GABARAPL1	PAR-CLIP	miRTarbase
hsa-miR-15a-5p	GABARAPL1	PAR-CLIP	miRTarbase
hsa-miR-195-5p	GABARAPL1	PAR-CLIP	miRTarbase
hsa-miR-195-5p	GABARAPL1	PAR-CLIP	miRTarbase
hsa-miR-195-5p	GABARAPL1	PAR-CLIP	miRTarbase
hsa-miR-3613-3p	GABARAPL1	PAR-CLIP	miRTarbase
hsa-miR-3613-3p	GABARAPL1	PAR-CLIP	miRTarbase
hsa-miR-3613-3p	GABARAPL1	PAR-CLIP	miRTarbase
hsa-miR-15a-5p	PDIK1L	HITS-CLIP	miRTarbase
hsa-miR-195-5p	PDIK1L	HITS-CLIP	miRTarbase
hsa-miR-15a-5p	ATXN7L3B	PAR-CLIP	miRTarbase
hsa-miR-15a-5p	ATXN7L3B	PAR-CLIP	miRTarbase
hsa-miR-195-5p	ATXN7L3B	PAR-CLIP	miRTarbase
hsa-miR-195-5p	ATXN7L3B	PAR-CLIP	miRTarbase
hsa-miR-141-5p	BCL2L2-PABPN1	PAR-CLIP	miRTarbase
hsa-miR-15a-5p	ZNF691	PAR-CLIP	miRTarbase
hsa-miR-15a-5p	ZNF691	PAR-CLIP	miRTarbase
hsa-miR-195-5p	ZNF691	PAR-CLIP	miRTarbase
hsa-miR-195-5p	ZNF691	PAR-CLIP	miRTarbase
hsa-miR-15a-5p	DYNLL2	PAR-CLIP	miRTarbase
hsa-miR-15a-5p	DYNLL2	PAR-CLIP	miRTarbase
hsa-miR-195-5p	DYNLL2	PAR-CLIP	miRTarbase
hsa-miR-195-5p	DYNLL2	PAR-CLIP	miRTarbase
hsa-miR-15a-3p	KIAA0195	PAR-CLIP	miRTarbase
hsa-miR-15a-5p	SRPRB	PAR-CLIP	miRTarbase
hsa-miR-15a-5p	SRPRB	PAR-CLIP	miRTarbase
hsa-miR-15a-5p	SRPRB	HITS-CLIP	miRTarbase
hsa-miR-195-5p	SRPRB	PAR-CLIP	miRTarbase
hsa-miR-195-5p	SRPRB	PAR-CLIP	miRTarbase
hsa-miR-195-5p	SRPRB	HITS-CLIP	miRTarbase
hsa-miR-15a-5p	CDC42SE2	PAR-CLIP	miRTarbase
hsa-miR-195-5p	CDC42SE2	PAR-CLIP	miRTarbase
hsa-miR-15a-5p	WIPI2	PAR-CLIP	miRTarbase
hsa-miR-15a-5p	WIPI2	HITS-CLIP	miRTarbase
hsa-miR-195-5p	WIPI2	PAR-CLIP	miRTarbase
hsa-miR-195-5p	WIPI2	HITS-CLIP	miRTarbase
hsa-miR-3613-3p	TCF7L2	PAR-CLIP	miRTarbase
hsa-miR-3613-3p	USP6NL	HITS-CLIP	miRTarbase
hsa-miR-3613-3p	C11ORF57	PAR-CLIP	miRTarbase
hsa-miR-15a-5p	TBRG1	PAR-CLIP	miRTarbase
hsa-miR-195-5p	TBRG1	PAR-CLIP	miRTarbase
hsa-miR-15a-5p	CHEK1	HITS-CLIP	miRTarbase
hsa-miR-15a-5p	CHEK1	HITS-CLIP	miRTarbase
hsa-miR-195-5p	CHEK1	HITS-CLIP	miRTarbase
hsa-miR-195-5p	CHEK1	HITS-CLIP	miRTarbase
hsa-miR-15a-5p	TMEM109	HITS-CLIP	miRTarbase
hsa-miR-195-5p	TMEM109	HITS-CLIP	miRTarbase
hsa-miR-15a-5p	C1ORF226	PAR-CLIP	miRTarbase
hsa-miR-195-5p	C1ORF226	PAR-CLIP	miRTarbase
hsa-miR-15a-5p	SIRT4	HITS-CLIP	miRTarbase
hsa-miR-195-5p	SIRT4	HITS-CLIP	miRTarbase
hsa-miR-15a-5p	SETD1B	PAR-CLIP	miRTarbase
hsa-miR-195-5p	SETD1B	PAR-CLIP	miRTarbase
hsa-miR-15a-5p	HOXC8	PAR-CLIP	miRTarbase
hsa-miR-195-5p	HOXC8	PAR-CLIP	miRTarbase
hsa-miR-15a-5p	RAB3IP	PAR-CLIP	miRTarbase
hsa-miR-195-5p	RAB3IP	PAR-CLIP	miRTarbase
hsa-miR-3613-3p	AKIRIN1	PAR-CLIP	miRTarbase
hsa-miR-15a-5p	PPP2R5C	PAR-CLIP	miRTarbase
hsa-miR-15a-5p	PPP2R5C	PAR-CLIP	miRTarbase
hsa-miR-195-5p	PPP2R5C	PAR-CLIP	miRTarbase
hsa-miR-195-5p	PPP2R5C	PAR-CLIP	miRTarbase
hsa-miR-15a-5p	SLCO3A1	HITS-CLIP	miRTarbase
hsa-miR-195-5p	SLCO3A1	HITS-CLIP	miRTarbase
hsa-miR-3613-3p	IGF1R	PAR-CLIP	miRTarbase
hsa-miR-3613-3p	SYNM	PAR-CLIP	miRTarbase
hsa-miR-3613-3p	ATF7IP2	HITS-CLIP	miRTarbase
hsa-miR-3605-5p	KCTD5	PAR-CLIP	miRTarbase
hsa-miR-3613-5p	MT2A	PAR-CLIP	miRTarbase
hsa-miR-15a-5p	MLLT6	HITS-CLIP	miRTarbase
hsa-miR-195-5p	MLLT6	HITS-CLIP	miRTarbase
hsa-miR-3613-3p	DYNLL2	PAR-CLIP	miRTarbase
hsa-miR-15a-5p	CBX2	PAR-CLIP	miRTarbase
hsa-miR-195-5p	CBX2	PAR-CLIP	miRTarbase
hsa-miR-195-3p	SH3GLB1	PAR-CLIP	miRTarbase
hsa-miR-486-3p	MKNK2	PAR-CLIP	miRTarbase
hsa-miR-486-3p	MKNK2	PAR-CLIP	miRTarbase
hsa-miR-486-3p	MKNK2	PAR-CLIP	miRTarbase
hsa-miR-15a-5p	ZFP28	PAR-CLIP	miRTarbase
hsa-miR-195-5p	ZFP28	PAR-CLIP	miRTarbase
hsa-miR-3613-3p	RPS28	PAR-CLIP	miRTarbase
hsa-miR-15a-5p	CHMP4B	PAR-CLIP	miRTarbase
hsa-miR-195-5p	CHMP4B	PAR-CLIP	miRTarbase
hsa-miR-15a-5p	GABPA	PAR-CLIP	miRTarbase
hsa-miR-15a-5p	GABPA	PAR-CLIP	miRTarbase
hsa-miR-195-5p	GABPA	PAR-CLIP	miRTarbase
hsa-miR-195-5p	GABPA	PAR-CLIP	miRTarbase
hsa-miR-15a-5p	STRADB	PAR-CLIP	miRTarbase
hsa-miR-195-5p	STRADB	PAR-CLIP	miRTarbase
hsa-miR-195-5p	STRADB	Microarray//qRT-PCR	miRTarbase
hsa-miR-15a-5p	MTMR3	PAR-CLIP	miRTarbase
hsa-miR-195-5p	MTMR3	PAR-CLIP	miRTarbase
hsa-miR-15a-5p	CRIM1	PAR-CLIP	miRTarbase
hsa-miR-15a-5p	CRIM1	PAR-CLIP	miRTarbase
hsa-miR-15a-5p	CRIM1	PAR-CLIP	miRTarbase
hsa-miR-195-5p	CRIM1	PAR-CLIP	miRTarbase
hsa-miR-195-5p	CRIM1	PAR-CLIP	miRTarbase
hsa-miR-195-5p	CRIM1	PAR-CLIP	miRTarbase
hsa-miR-15a-5p	SOCS5	PAR-CLIP	miRTarbase
hsa-miR-195-5p	SOCS5	PAR-CLIP	miRTarbase
hsa-miR-3613-3p	CALM2	PAR-CLIP	miRTarbase
hsa-miR-3613-3p	CALM2	PAR-CLIP	miRTarbase
hsa-miR-3613-3p	CALM2	PAR-CLIP	miRTarbase
hsa-miR-15a-5p	CTDSPL	PAR-CLIP	miRTarbase
hsa-miR-15a-5p	CTDSPL	PAR-CLIP	miRTarbase
hsa-miR-195-5p	CTDSPL	PAR-CLIP	miRTarbase
hsa-miR-195-5p	CTDSPL	PAR-CLIP	miRTarbase
hsa-miR-3613-3p	RHOA	HITS-CLIP	miRTarbase
hsa-miR-3613-3p	ZNF654	PAR-CLIP	miRTarbase
hsa-miR-15a-3p	LMNB1	PAR-CLIP	miRTarbase
hsa-miR-141-3p	HNRNPAB	PAR-CLIP	miRTarbase
hsa-miR-15a-5p	ITGA2	PAR-CLIP	miRTarbase
hsa-miR-195-5p	ITGA2	PAR-CLIP	miRTarbase
hsa-miR-15a-5p	PIK3R1	PAR-CLIP//HITS-CLIP	miRTarbase
hsa-miR-15a-5p	PIK3R1	HITS-CLIP	miRTarbase
hsa-miR-15a-5p	PIK3R1	PAR-CLIP	miRTarbase
hsa-miR-15a-5p	PIK3R1	HITS-CLIP	miRTarbase
hsa-miR-195-5p	PIK3R1	PAR-CLIP//HITS-CLIP	miRTarbase
hsa-miR-195-5p	PIK3R1	HITS-CLIP	miRTarbase
hsa-miR-195-5p	PIK3R1	PAR-CLIP	miRTarbase
hsa-miR-195-5p	PIK3R1	HITS-CLIP	miRTarbase
hsa-miR-15a-5p	PPIL1	PAR-CLIP	miRTarbase
hsa-miR-15a-5p	PPIL1	PAR-CLIP	miRTarbase
hsa-miR-15a-5p	PPIL1	HITS-CLIP	miRTarbase
hsa-miR-15a-5p	PPIL1	PAR-CLIP	miRTarbase
hsa-miR-195-5p	PPIL1	PAR-CLIP	miRTarbase
hsa-miR-195-5p	PPIL1	PAR-CLIP	miRTarbase
hsa-miR-195-5p	PPIL1	HITS-CLIP	miRTarbase
hsa-miR-195-5p	PPIL1	PAR-CLIP	miRTarbase
hsa-miR-15a-5p	CAPZA2	PAR-CLIP	miRTarbase
hsa-miR-195-5p	CAPZA2	PAR-CLIP	miRTarbase
hsa-miR-15a-5p	ZNRF2	PAR-CLIP	miRTarbase
hsa-miR-195-5p	ZNRF2	PAR-CLIP	miRTarbase
hsa-miR-486-5p	ZNRF2	PAR-CLIP	miRTarbase
hsa-miR-141-5p	RBM12B	PAR-CLIP	miRTarbase
hsa-miR-3613-3p	AKAP2	HITS-CLIP	miRTarbase
hsa-miR-3613-3p	PALM2-AKAP2	HITS-CLIP	miRTarbase
hsa-miR-15a-5p	IFT74	HITS-CLIP	miRTarbase
hsa-miR-195-5p	IFT74	HITS-CLIP	miRTarbase
hsa-miR-15a-5p	OCRL	HITS-CLIP	miRTarbase
hsa-miR-195-5p	OCRL	HITS-CLIP	miRTarbase
hsa-miR-15a-5p	CHIC1	PAR-CLIP	miRTarbase
hsa-miR-15a-5p	CHIC1	PAR-CLIP	miRTarbase
hsa-miR-15a-5p	CHIC1	PAR-CLIP	miRTarbase
hsa-miR-195-5p	CHIC1	PAR-CLIP	miRTarbase
hsa-miR-195-5p	CHIC1	PAR-CLIP	miRTarbase
hsa-miR-195-5p	CHIC1	PAR-CLIP	miRTarbase
hsa-miR-486-3p	U2AF2	PAR-CLIP	miRTarbase
hsa-miR-219a-1-3p	ACTR2	PAR-CLIP	miRTarbase
hsa-miR-3613-3p	SGMS2	PAR-CLIP	miRTarbase
hsa-miR-3613-3p	SGMS2	PAR-CLIP	miRTarbase
hsa-miR-3605-5p	GDI1	PAR-CLIP	miRTarbase
hsa-miR-3605-5p	GDI1	PAR-CLIP	miRTarbase
hsa-miR-195-5p	CRKL	PAR-CLIP	miRTarbase
hsa-miR-141-3p	IPO5	PAR-CLIP	miRTarbase
hsa-miR-219a-1-3p	NUFIP2	PAR-CLIP	miRTarbase
hsa-miR-486-3p	MBD6	PAR-CLIP	miRTarbase
hsa-miR-3613-3p	TMSB4X	PAR-CLIP	miRTarbase
hsa-miR-3613-3p	DFFA	HITS-CLIP	miRTarbase
hsa-miR-3613-3p	CELF1	PAR-CLIP	miRTarbase
hsa-miR-3613-3p	PTBP3	PAR-CLIP	miRTarbase
hsa-miR-3613-5p	FLVCR1	PAR-CLIP	miRTarbase
hsa-miR-3613-5p	MT1E	PAR-CLIP	miRTarbase
hsa-miR-3613-3p	IGFBP5	PAR-CLIP	miRTarbase
hsa-miR-141-3p	MAP4K4	Luciferase reporter assay//qRT-PCR//Western blot	miRTarbase
hsa-miR-195-5p	ALOX12	Microarray//qRT-PCR	miRTarbase
hsa-miR-195-5p	PHACTR2	Microarray//qRT-PCR	miRTarbase
hsa-miR-195-5p	CGNL1	Microarray//qRT-PCR	miRTarbase
hsa-miR-195-5p	KIF21A	Microarray//qRT-PCR	miRTarbase
hsa-miR-195-5p	RASGEF1B	Microarray//qRT-PCR	miRTarbase
hsa-miR-195-5p	TUFT1	Microarray//qRT-PCR	miRTarbase
hsa-miR-195-5p	PDIA6	PAR-CLIP	miRTarbase
hsa-miR-195-5p	PDIA6	Microarray//qRT-PCR	miRTarbase
hsa-miR-195-5p	PDIA6	HITS-CLIP	miRTarbase
hsa-miR-195-5p	SNX16	PAR-CLIP	miRTarbase
hsa-miR-195-5p	SNX16	PAR-CLIP	miRTarbase
hsa-miR-195-5p	SNX16	Microarray//qRT-PCR	miRTarbase
hsa-miR-195-5p	SNX16	PAR-CLIP	miRTarbase
hsa-miR-195-5p	TRIP10	Microarray//qRT-PCR	miRTarbase
hsa-miR-195-5p	CDC25A	Luciferase reporter assay//Western blot	miRTarbase
hsa-miR-195-5p	CDC25A	HITS-CLIP	miRTarbase
hsa-miR-195-5p	CDC25A	PAR-CLIP	miRTarbase
hsa-miR-195-5p	BTRC	Luciferase reporter assay//Western blot	miRTarbase
hsa-miR-195-5p	BTRC	HITS-CLIP	miRTarbase
hsa-miR-141-3p	HNRNPD	Luciferase reporter assay//Western blot	miRTarbase
hsa-miR-15a-5p	KLF6	Microarray//qRT-PCR//	miRTarbase
hsa-miR-15a-5p	PHLPP1	Luciferase reporter assay//Northern blot//qRT-PCR//Western blot	miRTarbase
hsa-miR-141-3p	ZMPSTE24	Luciferase reporter assay	miRTarbase
hsa-miR-195-5p	INSR	Luciferase reporter assay//qRT-PCR//Western blot	miRTarbase
hsa-miR-195-5p	ELN	Luciferase reporter assay//Western blot//qRT-PCR	miRTarbase
hsa-miR-195-5p	RET	Flow//Luciferase reporter assay	miRTarbase
hsa-miR-15a-5p	RET	Flow//Luciferase reporter assay	miRTarbase
hsa-miR-486-5p	IGF1R	Luciferase reporter assay//qRT-PCR//Western blot	miRTarbase
hsa-miR-486-5p	DOCK3	Immunofluorescence//Immunohistochemistry//Immunoprecipitaion//Luciferase reporter assay//qRT-PCR//Western blot	miRTarbase
hsa-miR-486-5p	CADM1	PAR-CLIP	miRTarbase
hsa-miR-486-5p	CADM1	qRT-PCR	miRTarbase
hsa-miR-486-5p	H3F3B	PAR-CLIP	miRTarbase
hsa-miR-486-5p	H3F3B	PAR-CLIP	miRTarbase
hsa-miR-486-5p	H3F3B	qRT-PCR	miRTarbase
hsa-miR-486-5p	H3F3B	PAR-CLIP	miRTarbase
hsa-miR-486-5p	H3F3B	PAR-CLIP	miRTarbase
hsa-miR-195-5p	Bace1	Luciferase reporter assay	miRTarbase
hsa-miR-3613-3p	PHKG2	PAR-CLIP	miRTarbase
hsa-miR-3613-3p	AK4	PAR-CLIP	miRTarbase
hsa-miR-3613-3p	AK4	PAR-CLIP	miRTarbase
hsa-miR-141-3p	STXBP2	PAR-CLIP	miRTarbase
hsa-miR-3613-3p	CCNB1IP1	PAR-CLIP	miRTarbase
hsa-miR-3613-3p	CCNB1IP1	PAR-CLIP	miRTarbase
hsa-miR-3613-3p	CCNB1IP1	PAR-CLIP	miRTarbase
hsa-miR-141-3p	SEPT8	PAR-CLIP	miRTarbase
hsa-miR-3613-3p	NINJ1	PAR-CLIP	miRTarbase
hsa-miR-15a-3p	C17orf96	PAR-CLIP	miRTarbase
hsa-miR-15a-3p	C17orf96	PAR-CLIP	miRTarbase
hsa-miR-15a-3p	KCNH5	PAR-CLIP	miRTarbase
hsa-miR-141-3p	DPY19L1	PAR-CLIP	miRTarbase
hsa-miR-15a-3p	ZNF514	PAR-CLIP	miRTarbase
hsa-miR-3613-3p	UHRF1BP1L	PAR-CLIP	miRTarbase
hsa-miR-3613-3p	SIX1	PAR-CLIP	miRTarbase
hsa-miR-3613-3p	SIX1	PAR-CLIP	miRTarbase
hsa-miR-3613-3p	TMEM158	PAR-CLIP	miRTarbase
hsa-miR-3613-3p	CCBE1	PAR-CLIP	miRTarbase
hsa-miR-3613-3p	CTNNA3	PAR-CLIP	miRTarbase
hsa-miR-3613-3p	CTNNA3	HITS-CLIP	miRTarbase
hsa-miR-15a-3p	CTNNA3	PAR-CLIP	miRTarbase
hsa-miR-15a-3p	ENAM	PAR-CLIP	miRTarbase
hsa-miR-15a-3p	ECHDC3	PAR-CLIP	miRTarbase
hsa-miR-3613-3p	FBXO48	PAR-CLIP	miRTarbase
hsa-miR-3613-3p	FBXO48	PAR-CLIP	miRTarbase
hsa-miR-3613-3p	FBXO48	PAR-CLIP	miRTarbase
hsa-miR-219a-1-3p	TAF8	PAR-CLIP	miRTarbase
hsa-miR-219a-1-3p	TAF8	PAR-CLIP	miRTarbase
hsa-miR-141-3p	CHML	PAR-CLIP	miRTarbase
hsa-miR-15a-3p	PLSCR1	PAR-CLIP	miRTarbase
hsa-miR-3613-3p	CDR2L	PAR-CLIP	miRTarbase
hsa-miR-3613-3p	SOWAHB	PAR-CLIP	miRTarbase
hsa-miR-3613-3p	TRAPPC6B	PAR-CLIP	miRTarbase
hsa-miR-15a-3p	TRAPPC6B	PAR-CLIP	miRTarbase
hsa-miR-3613-3p	SLC14A1	PAR-CLIP	miRTarbase
hsa-miR-15a-5p	SIDT2	PAR-CLIP	miRTarbase
hsa-miR-195-5p	SIDT2	PAR-CLIP	miRTarbase
hsa-miR-3613-3p	ZNF257	PAR-CLIP	miRTarbase
hsa-miR-3613-3p	S1PR2	PAR-CLIP	miRTarbase
hsa-miR-219a-1-3p	FAM9C	PAR-CLIP	miRTarbase
hsa-miR-3613-3p	FAM46D	PAR-CLIP	miRTarbase
hsa-miR-195-3p	ABCG2	PAR-CLIP	miRTarbase
hsa-miR-3613-3p	GSTCD	PAR-CLIP	miRTarbase
hsa-miR-3613-3p	GSTCD	HITS-CLIP	miRTarbase
hsa-miR-3613-3p	NCOA4	PAR-CLIP	miRTarbase
hsa-miR-3613-3p	PHF14	PAR-CLIP	miRTarbase
hsa-miR-3613-3p	PHF14	PAR-CLIP	miRTarbase
hsa-miR-3613-3p	PTCHD1	PAR-CLIP	miRTarbase
hsa-miR-3613-3p	PTCHD1	PAR-CLIP	miRTarbase
hsa-miR-3605-5p	KDM6A	PAR-CLIP	miRTarbase
hsa-miR-3613-3p	CRNKL1	PAR-CLIP	miRTarbase
hsa-miR-3613-3p	CRNKL1	PAR-CLIP	miRTarbase
hsa-miR-486-5p	PCCA	PAR-CLIP	miRTarbase
hsa-miR-3605-5p	ATP5C1	PAR-CLIP	miRTarbase
hsa-miR-3605-5p	SYNCRIP	PAR-CLIP	miRTarbase
hsa-miR-219a-1-3p	SNX1	PAR-CLIP	miRTarbase
hsa-miR-195-5p	ASCC1	PAR-CLIP	miRTarbase
hsa-miR-15a-5p	ASCC1	PAR-CLIP	miRTarbase
hsa-miR-3613-3p	FUT10	PAR-CLIP	miRTarbase
hsa-miR-3613-3p	SLC36A4	PAR-CLIP	miRTarbase
hsa-miR-3605-5p	ZNF554	PAR-CLIP	miRTarbase
hsa-miR-3613-3p	MCM9	PAR-CLIP	miRTarbase
hsa-miR-3605-5p	SLCO4C1	PAR-CLIP	miRTarbase
hsa-miR-3613-3p	KCNAB1	PAR-CLIP	miRTarbase
hsa-miR-3613-3p	SLFN5	PAR-CLIP	miRTarbase
hsa-miR-3613-3p	ADM	PAR-CLIP	miRTarbase
hsa-miR-15a-3p	TEX261	PAR-CLIP	miRTarbase
hsa-miR-3613-5p	CUL3	PAR-CLIP	miRTarbase
hsa-miR-141-3p	NDST4	PAR-CLIP	miRTarbase
hsa-miR-195-5p	DMRT2	PAR-CLIP	miRTarbase
hsa-miR-15a-5p	DMRT2	PAR-CLIP	miRTarbase
hsa-miR-3605-5p	SLC25A43	PAR-CLIP	miRTarbase
hsa-miR-15a-5p	TLL1	PAR-CLIP	miRTarbase
hsa-miR-195-5p	TLL1	PAR-CLIP	miRTarbase
hsa-miR-3613-3p	CLCN6	PAR-CLIP	miRTarbase
hsa-miR-3605-5p	LUC7L3	PAR-CLIP	miRTarbase
hsa-miR-195-5p	LUC7L3	PAR-CLIP	miRTarbase
hsa-miR-15a-5p	LUC7L3	PAR-CLIP	miRTarbase
hsa-miR-3613-3p	SHOX2	PAR-CLIP	miRTarbase
hsa-miR-3613-3p	HAT1	PAR-CLIP	miRTarbase
hsa-miR-219a-1-3p	HES2	PAR-CLIP	miRTarbase
hsa-miR-3605-5p	C1orf109	PAR-CLIP	miRTarbase
hsa-miR-3613-3p	ADH5	PAR-CLIP	miRTarbase
hsa-miR-141-5p	TNFAIP3	PAR-CLIP	miRTarbase
hsa-miR-3613-5p	RORA	PAR-CLIP	miRTarbase
hsa-miR-486-3p	PIN1	PAR-CLIP	miRTarbase
hsa-miR-3605-5p	PIN1	PAR-CLIP	miRTarbase
hsa-miR-486-3p	CIAPIN1	PAR-CLIP	miRTarbase
hsa-miR-3605-5p	ALDH3B1	PAR-CLIP	miRTarbase
hsa-miR-195-5p	ALDH3B1	PAR-CLIP	miRTarbase
hsa-miR-15a-5p	ALDH3B1	PAR-CLIP	miRTarbase
hsa-miR-3605-5p	SOD2	PAR-CLIP	miRTarbase
hsa-miR-3605-5p	SOD2	PAR-CLIP	miRTarbase
hsa-miR-3605-5p	SOD2	PAR-CLIP	miRTarbase
hsa-miR-3605-5p	SOD2	PAR-CLIP	miRTarbase
hsa-miR-486-3p	TMPRSS5	PAR-CLIP	miRTarbase
hsa-miR-3605-5p	NUCB2	PAR-CLIP	miRTarbase
hsa-miR-141-3p	TRAM1	PAR-CLIP	miRTarbase
hsa-miR-486-3p	EIF5AL1	PAR-CLIP	miRTarbase
hsa-miR-486-3p	LY6E	PAR-CLIP	miRTarbase
hsa-miR-486-3p	LY6E	PAR-CLIP	miRTarbase
hsa-miR-141-5p	SORCS2	PAR-CLIP	miRTarbase
hsa-miR-486-3p	REPIN1	PAR-CLIP	miRTarbase
hsa-miR-486-3p	TANGO2	PAR-CLIP	miRTarbase
hsa-miR-195-5p	EFTUD2	PAR-CLIP	miRTarbase
hsa-miR-15a-5p	EFTUD2	PAR-CLIP	miRTarbase
hsa-miR-486-3p	CACNA2D2	PAR-CLIP	miRTarbase
hsa-miR-486-3p	SLC4A2	PAR-CLIP	miRTarbase
hsa-miR-195-5p	CSNK1E	PAR-CLIP	miRTarbase
hsa-miR-15a-5p	CSNK1E	PAR-CLIP	miRTarbase
hsa-miR-3605-5p	DDT	PAR-CLIP	miRTarbase
hsa-miR-486-3p	SLC29A1	PAR-CLIP	miRTarbase
hsa-miR-195-5p	TPM2	PAR-CLIP	miRTarbase
hsa-miR-15a-5p	TPM2	PAR-CLIP	miRTarbase
hsa-miR-486-3p	MEN1	PAR-CLIP	miRTarbase
hsa-miR-3605-5p	C6orf106	PAR-CLIP	miRTarbase
hsa-miR-141-3p	YRDC	PAR-CLIP	miRTarbase
hsa-miR-141-3p	YRDC	PAR-CLIP//HITS-CLIP	miRTarbase
hsa-miR-141-3p	YRDC	PAR-CLIP	miRTarbase
hsa-miR-141-3p	YRDC	PAR-CLIP	miRTarbase
hsa-miR-141-3p	YRDC	PAR-CLIP	miRTarbase
hsa-miR-141-3p	YRDC	PAR-CLIP	miRTarbase
hsa-miR-486-3p	HECTD3	PAR-CLIP	miRTarbase
hsa-miR-3613-5p	F11R	PAR-CLIP	miRTarbase
hsa-miR-3605-5p	MRPL18	PAR-CLIP	miRTarbase
hsa-miR-3605-5p	TOMM20	PAR-CLIP	miRTarbase
hsa-miR-486-3p	NID1	PAR-CLIP	miRTarbase
hsa-miR-486-3p	MTHFSD	PAR-CLIP	miRTarbase
hsa-miR-195-5p	ZNF460	PAR-CLIP	miRTarbase
hsa-miR-195-5p	ZNF460	PAR-CLIP//HITS-CLIP	miRTarbase
hsa-miR-195-5p	ZNF460	PAR-CLIP	miRTarbase
hsa-miR-195-5p	ZNF460	PAR-CLIP	miRTarbase
hsa-miR-195-5p	ZNF460	PAR-CLIP	miRTarbase
hsa-miR-15a-5p	ZNF460	PAR-CLIP	miRTarbase
hsa-miR-15a-5p	ZNF460	PAR-CLIP//HITS-CLIP	miRTarbase
hsa-miR-15a-5p	ZNF460	PAR-CLIP	miRTarbase
hsa-miR-15a-5p	ZNF460	PAR-CLIP	miRTarbase
hsa-miR-15a-5p	ZNF460	PAR-CLIP	miRTarbase
hsa-miR-486-3p	CAMK2A	PAR-CLIP	miRTarbase
hsa-miR-486-3p	ZMAT5	PAR-CLIP	miRTarbase
hsa-miR-3605-5p	MRPL12	PAR-CLIP	miRTarbase
hsa-miR-141-5p	FOXL2	PAR-CLIP	miRTarbase
hsa-miR-486-3p	KLHL38	PAR-CLIP	miRTarbase
hsa-miR-486-3p	KLHL38	HITS-CLIP	miRTarbase
hsa-miR-486-3p	KLHL38	PAR-CLIP	miRTarbase
hsa-miR-3605-5p	TNFRSF10D	PAR-CLIP	miRTarbase
hsa-miR-219a-1-3p	HSPA6	PAR-CLIP	miRTarbase
hsa-miR-219a-1-3p	HSPA6	HITS-CLIP	miRTarbase
hsa-miR-3605-5p	POTED	PAR-CLIP	miRTarbase
hsa-miR-3605-5p	POTED	PAR-CLIP	miRTarbase
hsa-miR-3605-5p	POTED	PAR-CLIP	miRTarbase
hsa-miR-3605-5p	POTED	PAR-CLIP	miRTarbase
hsa-miR-3605-5p	POTED	PAR-CLIP	miRTarbase
hsa-miR-3605-5p	POC1A	PAR-CLIP	miRTarbase
hsa-miR-195-5p	FGFR4	PAR-CLIP	miRTarbase
hsa-miR-15a-5p	FGFR4	PAR-CLIP	miRTarbase
hsa-miR-486-3p	TXNDC16	HITS-CLIP	miRTarbase
hsa-miR-486-3p	TXNDC16	PAR-CLIP	miRTarbase
hsa-miR-3605-5p	TNFRSF10B	PAR-CLIP	miRTarbase
hsa-miR-3605-5p	TNFRSF10B	PAR-CLIP	miRTarbase
hsa-miR-195-5p	DOCK11	PAR-CLIP	miRTarbase
hsa-miR-15a-5p	DOCK11	PAR-CLIP	miRTarbase
hsa-miR-3605-5p	METTL1	PAR-CLIP	miRTarbase
hsa-miR-195-5p	ACTR3B	PAR-CLIP	miRTarbase
hsa-miR-15a-5p	ACTR3B	PAR-CLIP	miRTarbase
hsa-miR-3605-5p	ZNF426	PAR-CLIP	miRTarbase
hsa-miR-3605-5p	MPDU1	PAR-CLIP	miRTarbase
hsa-miR-486-3p	FXR2	PAR-CLIP	miRTarbase
hsa-miR-486-3p	C20orf27	PAR-CLIP	miRTarbase
hsa-miR-486-3p	C20orf27	PAR-CLIP	miRTarbase
hsa-miR-3605-5p	TTLL12	PAR-CLIP	miRTarbase
hsa-miR-486-3p	NTN1	PAR-CLIP	miRTarbase
hsa-miR-486-3p	BCL3	PAR-CLIP	miRTarbase
hsa-miR-3605-5p	CYP51A1	PAR-CLIP	miRTarbase
hsa-miR-195-5p	ZNF367	PAR-CLIP	miRTarbase
hsa-miR-195-5p	ZNF367	PAR-CLIP//HITS-CLIP	miRTarbase
hsa-miR-195-5p	ZNF367	PAR-CLIP	miRTarbase
hsa-miR-195-5p	ZNF367	PAR-CLIP	miRTarbase
hsa-miR-195-5p	ZNF367	PAR-CLIP	miRTarbase
hsa-miR-15a-5p	ZNF367	PAR-CLIP	miRTarbase
hsa-miR-15a-5p	ZNF367	PAR-CLIP//HITS-CLIP	miRTarbase
hsa-miR-15a-5p	ZNF367	PAR-CLIP	miRTarbase
hsa-miR-15a-5p	ZNF367	PAR-CLIP	miRTarbase
hsa-miR-15a-5p	ZNF367	PAR-CLIP	miRTarbase
hsa-miR-195-3p	ZFX	PAR-CLIP	miRTarbase
hsa-miR-195-3p	ZFX	PAR-CLIP	miRTarbase
hsa-miR-486-3p	ZFHX3	PAR-CLIP	miRTarbase
hsa-miR-486-5p	ZDHHC20	PAR-CLIP	miRTarbase
hsa-miR-486-3p	ZC3HAV1L	PAR-CLIP	miRTarbase
hsa-miR-486-3p	WAC	PAR-CLIP	miRTarbase
hsa-miR-219a-1-3p	VPS28	PAR-CLIP	miRTarbase
hsa-miR-486-3p	UST	PAR-CLIP	miRTarbase
hsa-miR-195-5p	UBE2V1	PAR-CLIP	miRTarbase
hsa-miR-195-5p	UBE2V1	PAR-CLIP	miRTarbase
hsa-miR-195-5p	UBE2V1	PAR-CLIP	miRTarbase
hsa-miR-195-5p	UBE2V1	PAR-CLIP	miRTarbase
hsa-miR-15a-5p	UBE2V1	PAR-CLIP	miRTarbase
hsa-miR-15a-5p	UBE2V1	PAR-CLIP	miRTarbase
hsa-miR-15a-5p	UBE2V1	PAR-CLIP	miRTarbase
hsa-miR-15a-5p	UBE2V1	PAR-CLIP	miRTarbase
hsa-miR-195-5p	UBE2Q1	HITS-CLIP	miRTarbase
hsa-miR-195-5p	UBE2Q1	PAR-CLIP	miRTarbase
hsa-miR-15a-5p	UBE2Q1	HITS-CLIP	miRTarbase
hsa-miR-15a-5p	UBE2Q1	PAR-CLIP	miRTarbase
hsa-miR-486-3p	UBB	PAR-CLIP	miRTarbase
hsa-miR-486-3p	UBB	PAR-CLIP	miRTarbase
hsa-miR-486-3p	UBB	PAR-CLIP	miRTarbase
hsa-miR-486-3p	UBB	PAR-CLIP	miRTarbase
hsa-miR-486-3p	TXLNA	PAR-CLIP	miRTarbase
hsa-miR-486-3p	TXLNA	PAR-CLIP	miRTarbase
hsa-miR-3605-5p	TWIST1	PAR-CLIP	miRTarbase
hsa-miR-486-3p	TUBB2A	PAR-CLIP	miRTarbase
hsa-miR-486-3p	TUBB2A	PAR-CLIP	miRTarbase
hsa-miR-486-3p	TUBB2A	PAR-CLIP	miRTarbase
hsa-miR-486-3p	TUBB2A	PAR-CLIP	miRTarbase
hsa-miR-486-3p	TUBB2A	PAR-CLIP	miRTarbase
hsa-miR-3605-5p	TTC14	PAR-CLIP	miRTarbase
hsa-miR-3605-5p	TSR1	PAR-CLIP	miRTarbase
hsa-miR-3613-3p	TSC22D3	PAR-CLIP	miRTarbase
hsa-miR-3613-3p	TSC22D3	PAR-CLIP	miRTarbase
hsa-miR-195-5p	TSC22D2	PAR-CLIP	miRTarbase
hsa-miR-15a-5p	TSC22D2	PAR-CLIP	miRTarbase
hsa-miR-219a-1-3p	TOR1B	PAR-CLIP	miRTarbase
hsa-miR-3605-5p	TOR1B	PAR-CLIP	miRTarbase
hsa-miR-195-5p	TOB2	PAR-CLIP	miRTarbase
hsa-miR-15a-5p	TOB2	PAR-CLIP	miRTarbase
hsa-miR-486-3p	TNRC6B	PAR-CLIP	miRTarbase
hsa-miR-15a-3p	TMEM64	PAR-CLIP	miRTarbase
hsa-miR-15a-3p	TMEM64	PAR-CLIP	miRTarbase
hsa-miR-15a-5p	TMEM189-UBE2V1	PAR-CLIP	miRTarbase
hsa-miR-15a-5p	TMEM189-UBE2V1	PAR-CLIP	miRTarbase
hsa-miR-15a-5p	TMEM189-UBE2V1	PAR-CLIP	miRTarbase
hsa-miR-15a-5p	TMEM189-UBE2V1	PAR-CLIP	miRTarbase
hsa-miR-195-5p	TMEM189-UBE2V1	PAR-CLIP	miRTarbase
hsa-miR-195-5p	TMEM189-UBE2V1	PAR-CLIP	miRTarbase
hsa-miR-195-5p	TMEM189-UBE2V1	PAR-CLIP	miRTarbase
hsa-miR-195-5p	TMEM189-UBE2V1	PAR-CLIP	miRTarbase
hsa-miR-15a-5p	TMEM189	PAR-CLIP	miRTarbase
hsa-miR-15a-5p	TMEM189	PAR-CLIP	miRTarbase
hsa-miR-15a-5p	TMEM189	PAR-CLIP	miRTarbase
hsa-miR-15a-5p	TMEM189	PAR-CLIP	miRTarbase
hsa-miR-195-5p	TMEM189	PAR-CLIP	miRTarbase
hsa-miR-195-5p	TMEM189	PAR-CLIP	miRTarbase
hsa-miR-195-5p	TMEM189	PAR-CLIP	miRTarbase
hsa-miR-195-5p	TMEM189	PAR-CLIP	miRTarbase
hsa-miR-3613-3p	TMEM170A	PAR-CLIP	miRTarbase
hsa-miR-3613-3p	TMEM170A	PAR-CLIP	miRTarbase
hsa-miR-3613-3p	TMEM170A	PAR-CLIP	miRTarbase
hsa-miR-3613-3p	TMEM170A	PAR-CLIP	miRTarbase
hsa-miR-3613-3p	TMEM170A	PAR-CLIP	miRTarbase
hsa-miR-3613-3p	TMEM170A	HITS-CLIP	miRTarbase
hsa-miR-3613-3p	TMEM170A	PAR-CLIP	miRTarbase
hsa-miR-195-5p	TM4SF1	PAR-CLIP	miRTarbase
hsa-miR-15a-5p	TM4SF1	PAR-CLIP	miRTarbase
hsa-miR-195-5p	TFAP2A	PAR-CLIP	miRTarbase
hsa-miR-195-5p	TFAP2A	PAR-CLIP	miRTarbase
hsa-miR-195-5p	TFAP2A	PAR-CLIP	miRTarbase
hsa-miR-195-5p	TFAP2A	PAR-CLIP	miRTarbase
hsa-miR-15a-5p	TFAP2A	PAR-CLIP	miRTarbase
hsa-miR-15a-5p	TFAP2A	PAR-CLIP	miRTarbase
hsa-miR-15a-5p	TFAP2A	PAR-CLIP	miRTarbase
hsa-miR-15a-5p	TFAP2A	PAR-CLIP	miRTarbase
hsa-miR-219a-1-3p	TEAD1	PAR-CLIP	miRTarbase
hsa-miR-15a-5p	STK38	PAR-CLIP	miRTarbase
hsa-miR-15a-5p	STK38	PAR-CLIP	miRTarbase
hsa-miR-15a-5p	STK38	PAR-CLIP	miRTarbase
hsa-miR-15a-5p	STK38	PAR-CLIP	miRTarbase
hsa-miR-15a-5p	STK38	PAR-CLIP	miRTarbase
hsa-miR-195-5p	STK38	PAR-CLIP	miRTarbase
hsa-miR-195-5p	STK38	PAR-CLIP	miRTarbase
hsa-miR-195-5p	STK38	PAR-CLIP	miRTarbase
hsa-miR-195-5p	STK38	PAR-CLIP	miRTarbase
hsa-miR-195-5p	STK38	PAR-CLIP	miRTarbase
hsa-miR-195-5p	SSRP1	PAR-CLIP	miRTarbase
hsa-miR-195-5p	SSRP1	HITS-CLIP	miRTarbase
hsa-miR-195-5p	SSRP1	PAR-CLIP	miRTarbase
hsa-miR-15a-5p	SSRP1	PAR-CLIP	miRTarbase
hsa-miR-15a-5p	SSRP1	HITS-CLIP	miRTarbase
hsa-miR-15a-5p	SSRP1	PAR-CLIP	miRTarbase
hsa-miR-486-3p	SREBF2	PAR-CLIP	miRTarbase
hsa-miR-486-3p	SPRED1	PAR-CLIP	miRTarbase
hsa-miR-219a-1-3p	SLC36A1	PAR-CLIP	miRTarbase
hsa-miR-486-3p	SLC25A34	PAR-CLIP	miRTarbase
hsa-miR-486-3p	SIK1	PAR-CLIP	miRTarbase
hsa-miR-15a-5p	SIK1	HITS-CLIP	miRTarbase
hsa-miR-15a-5p	SIK1	PAR-CLIP	miRTarbase
hsa-miR-195-5p	SIK1	HITS-CLIP	miRTarbase
hsa-miR-195-5p	SIK1	PAR-CLIP	miRTarbase
hsa-miR-486-3p	SH3PXD2A	PAR-CLIP	miRTarbase
hsa-miR-195-5p	SH3BP4	PAR-CLIP	miRTarbase
hsa-miR-15a-5p	SH3BP4	PAR-CLIP	miRTarbase
hsa-miR-15a-5p	SEC24A	PAR-CLIP	miRTarbase
hsa-miR-15a-5p	SEC24A	PAR-CLIP	miRTarbase
hsa-miR-195-5p	SEC24A	PAR-CLIP	miRTarbase
hsa-miR-195-5p	SEC24A	PAR-CLIP	miRTarbase
hsa-miR-219a-1-3p	RPS14	PAR-CLIP	miRTarbase
hsa-miR-486-3p	RNF41	PAR-CLIP	miRTarbase
hsa-miR-195-5p	RNF168	PAR-CLIP	miRTarbase
hsa-miR-15a-5p	RNF168	PAR-CLIP	miRTarbase
hsa-miR-195-5p	REL	PAR-CLIP	miRTarbase
hsa-miR-195-5p	REL	PAR-CLIP	miRTarbase
hsa-miR-195-5p	REL	PAR-CLIP	miRTarbase
hsa-miR-15a-5p	REL	PAR-CLIP	miRTarbase
hsa-miR-15a-5p	REL	PAR-CLIP	miRTarbase
hsa-miR-15a-5p	REL	PAR-CLIP	miRTarbase
hsa-miR-141-5p	RACGAP1	PAR-CLIP	miRTarbase
hsa-miR-141-5p	RACGAP1	PAR-CLIP	miRTarbase
hsa-miR-141-5p	RACGAP1	PAR-CLIP	miRTarbase
hsa-miR-141-5p	RACGAP1	PAR-CLIP	miRTarbase
hsa-miR-486-3p	PTPRF	PAR-CLIP	miRTarbase
hsa-miR-486-3p	PTPRF	PAR-CLIP	miRTarbase
hsa-miR-486-3p	PTPRF	HITS-CLIP	miRTarbase
hsa-miR-486-3p	PTPRF	PAR-CLIP	miRTarbase
hsa-miR-141-3p	PSMD11	PAR-CLIP	miRTarbase
hsa-miR-3613-5p	PRKAA1	PAR-CLIP	miRTarbase
hsa-miR-3605-5p	PPP2R5E	PAR-CLIP	miRTarbase
hsa-miR-15a-3p	COASY	PAR-CLIP	miRTarbase
hsa-miR-3605-3p	PODXL	PAR-CLIP	miRTarbase
hsa-miR-195-5p	PISD	PAR-CLIP	miRTarbase
hsa-miR-195-5p	PISD	PAR-CLIP	miRTarbase
hsa-miR-195-5p	PISD	PAR-CLIP	miRTarbase
hsa-miR-195-5p	PISD	PAR-CLIP	miRTarbase
hsa-miR-195-5p	PISD	PAR-CLIP	miRTarbase
hsa-miR-15a-5p	PISD	PAR-CLIP	miRTarbase
hsa-miR-15a-5p	PISD	PAR-CLIP	miRTarbase
hsa-miR-15a-5p	PISD	PAR-CLIP	miRTarbase
hsa-miR-15a-5p	PISD	PAR-CLIP	miRTarbase
hsa-miR-15a-5p	PISD	PAR-CLIP	miRTarbase
hsa-miR-486-3p	PGAM4	PAR-CLIP	miRTarbase
hsa-miR-3605-5p	PDPR	PAR-CLIP	miRTarbase
hsa-miR-195-5p	PDE4D	PAR-CLIP	miRTarbase
hsa-miR-195-5p	PDE4D	PAR-CLIP	miRTarbase
hsa-miR-15a-5p	PDE4D	PAR-CLIP	miRTarbase
hsa-miR-15a-5p	PDE4D	PAR-CLIP	miRTarbase
hsa-miR-3613-5p	PCGF3	PAR-CLIP	miRTarbase
hsa-miR-195-3p	NUS1	PAR-CLIP	miRTarbase
hsa-miR-195-3p	NUS1	PAR-CLIP	miRTarbase
hsa-miR-195-3p	NUS1	PAR-CLIP	miRTarbase
hsa-miR-195-3p	NUS1	PAR-CLIP	miRTarbase
hsa-miR-3605-5p	NUAK2	PAR-CLIP	miRTarbase
hsa-miR-3613-3p	NRAS	PAR-CLIP	miRTarbase
hsa-miR-195-5p	NR6A1	PAR-CLIP	miRTarbase
hsa-miR-15a-5p	NR6A1	PAR-CLIP	miRTarbase
hsa-miR-141-5p	NPEPPS	PAR-CLIP	miRTarbase
hsa-miR-15a-5p	NFIC	PAR-CLIP	miRTarbase
hsa-miR-195-5p	NFIC	PAR-CLIP	miRTarbase
hsa-miR-486-3p	NDRG3	PAR-CLIP	miRTarbase
hsa-miR-486-3p	NDRG3	HITS-CLIP	miRTarbase
hsa-miR-15a-5p	NAA25	PAR-CLIP	miRTarbase
hsa-miR-15a-5p	NAA25	PAR-CLIP	miRTarbase
hsa-miR-195-5p	NAA25	PAR-CLIP	miRTarbase
hsa-miR-195-5p	NAA25	PAR-CLIP	miRTarbase
hsa-miR-486-3p	MTMR12	PAR-CLIP	miRTarbase
hsa-miR-3605-5p	MTMR10	PAR-CLIP	miRTarbase
hsa-miR-3605-5p	MTMR10	PAR-CLIP	miRTarbase
hsa-miR-3605-5p	MRAS	PAR-CLIP	miRTarbase
hsa-miR-486-3p	MBD4	PAR-CLIP	miRTarbase
hsa-miR-486-3p	MBD4	PAR-CLIP	miRTarbase
hsa-miR-486-3p	MBD4	PAR-CLIP	miRTarbase
hsa-miR-486-3p	MDM4	PAR-CLIP	miRTarbase
hsa-miR-141-3p	MCL1	PAR-CLIP	miRTarbase
hsa-miR-3605-5p	MAPK1	PAR-CLIP	miRTarbase
hsa-miR-486-3p	LGSN	PAR-CLIP	miRTarbase
hsa-miR-195-5p	LAMC1	PAR-CLIP	miRTarbase
hsa-miR-15a-5p	LAMC1	PAR-CLIP	miRTarbase
hsa-miR-486-3p	KMT2D	PAR-CLIP	miRTarbase
hsa-miR-3605-5p	KIF5A	PAR-CLIP	miRTarbase
hsa-miR-3613-3p	KIF13A	PAR-CLIP	miRTarbase
hsa-miR-3613-3p	KIF13A	PAR-CLIP	miRTarbase
hsa-miR-3613-3p	KIF13A	PAR-CLIP	miRTarbase
hsa-miR-15a-5p	KIAA0226	PAR-CLIP	miRTarbase
hsa-miR-195-5p	KIAA0226	PAR-CLIP	miRTarbase
hsa-miR-3605-5p	KCND3	PAR-CLIP	miRTarbase
hsa-miR-195-5p	IVNS1ABP	PAR-CLIP	miRTarbase
hsa-miR-195-5p	IVNS1ABP	PAR-CLIP	miRTarbase
hsa-miR-195-5p	IVNS1ABP	PAR-CLIP	miRTarbase
hsa-miR-15a-5p	IVNS1ABP	PAR-CLIP	miRTarbase
hsa-miR-15a-5p	IVNS1ABP	PAR-CLIP	miRTarbase
hsa-miR-15a-5p	IVNS1ABP	PAR-CLIP	miRTarbase
hsa-miR-195-5p	IPPK	PAR-CLIP	miRTarbase
hsa-miR-15a-5p	IPPK	PAR-CLIP	miRTarbase
hsa-miR-195-5p	HOXA3	PAR-CLIP	miRTarbase
hsa-miR-195-5p	HOXA3	PAR-CLIP//HITS-CLIP	miRTarbase
hsa-miR-195-5p	HOXA3	PAR-CLIP	miRTarbase
hsa-miR-195-5p	HOXA3	PAR-CLIP	miRTarbase
hsa-miR-15a-5p	HOXA3	PAR-CLIP	miRTarbase
hsa-miR-15a-5p	HOXA3	PAR-CLIP//HITS-CLIP	miRTarbase
hsa-miR-15a-5p	HOXA3	PAR-CLIP	miRTarbase
hsa-miR-15a-5p	HOXA3	PAR-CLIP	miRTarbase
hsa-miR-219a-1-3p	HMGB1	PAR-CLIP	miRTarbase
hsa-miR-195-5p	HEYL	PAR-CLIP	miRTarbase
hsa-miR-15a-5p	HEYL	PAR-CLIP	miRTarbase
hsa-miR-15a-3p	HDGF	PAR-CLIP	miRTarbase
hsa-miR-195-5p	HDGF	PAR-CLIP	miRTarbase
hsa-miR-195-5p	HDGF	PAR-CLIP	miRTarbase
hsa-miR-15a-5p	HDGF	PAR-CLIP	miRTarbase
hsa-miR-15a-5p	HDGF	PAR-CLIP	miRTarbase
hsa-miR-3613-5p	H3F3C	PAR-CLIP	miRTarbase
hsa-miR-3613-5p	H3F3C	PAR-CLIP	miRTarbase
hsa-miR-3605-5p	GPR137C	PAR-CLIP	miRTarbase
hsa-miR-3605-5p	GPR137C	PAR-CLIP	miRTarbase
hsa-miR-3605-5p	GPR137C	PAR-CLIP	miRTarbase
hsa-miR-3605-5p	GPR137C	PAR-CLIP	miRTarbase
hsa-miR-195-5p	GNB1	PAR-CLIP	miRTarbase
hsa-miR-195-5p	GNB1	PAR-CLIP	miRTarbase
hsa-miR-195-5p	GNB1	HITS-CLIP	miRTarbase
hsa-miR-195-5p	GNB1	PAR-CLIP	miRTarbase
hsa-miR-15a-5p	GNB1	PAR-CLIP	miRTarbase
hsa-miR-15a-5p	GNB1	PAR-CLIP	miRTarbase
hsa-miR-15a-5p	GNB1	HITS-CLIP	miRTarbase
hsa-miR-15a-5p	GNB1	PAR-CLIP	miRTarbase
hsa-miR-195-5p	GNAL	PAR-CLIP	miRTarbase
hsa-miR-195-5p	GNAL	PAR-CLIP//HITS-CLIP	miRTarbase
hsa-miR-195-5p	GNAL	PAR-CLIP	miRTarbase
hsa-miR-15a-5p	GNAL	PAR-CLIP	miRTarbase
hsa-miR-15a-5p	GNAL	PAR-CLIP//HITS-CLIP	miRTarbase
hsa-miR-15a-5p	GNAL	PAR-CLIP	miRTarbase
hsa-miR-195-5p	FURIN	PAR-CLIP	miRTarbase
hsa-miR-15a-5p	FURIN	PAR-CLIP	miRTarbase
hsa-miR-3605-5p	EPHA2	PAR-CLIP	miRTarbase
hsa-miR-486-3p	ELOVL5	PAR-CLIP	miRTarbase
hsa-miR-195-5p	EIF1AX	PAR-CLIP	miRTarbase
hsa-miR-195-5p	EIF1AX	PAR-CLIP	miRTarbase
hsa-miR-195-5p	EIF1AX	PAR-CLIP	miRTarbase
hsa-miR-195-5p	EIF1AX	PAR-CLIP	miRTarbase
hsa-miR-15a-5p	EIF1AX	PAR-CLIP	miRTarbase
hsa-miR-15a-5p	EIF1AX	PAR-CLIP	miRTarbase
hsa-miR-15a-5p	EIF1AX	PAR-CLIP	miRTarbase
hsa-miR-15a-5p	EIF1AX	PAR-CLIP	miRTarbase
hsa-miR-3605-5p	DYRK3	PAR-CLIP	miRTarbase
hsa-miR-195-5p	DYRK3	PAR-CLIP	miRTarbase
hsa-miR-15a-5p	DYRK3	PAR-CLIP	miRTarbase
hsa-miR-3605-5p	DNAJC10	PAR-CLIP	miRTarbase
hsa-miR-3605-5p	DNAJC10	PAR-CLIP	miRTarbase
hsa-miR-3605-5p	DNAJC10	PAR-CLIP	miRTarbase
hsa-miR-3605-5p	DNAJC10	PAR-CLIP	miRTarbase
hsa-miR-3605-5p	DNAJC10	PAR-CLIP	miRTarbase
hsa-miR-486-3p	DLGAP4	PAR-CLIP	miRTarbase
hsa-miR-3613-3p	DLG5	PAR-CLIP	miRTarbase
hsa-miR-3613-3p	DLG5	PAR-CLIP	miRTarbase
hsa-miR-3613-3p	DLG5	PAR-CLIP	miRTarbase
hsa-miR-3613-3p	DDX6	HITS-CLIP	miRTarbase
hsa-miR-3613-3p	DDX6	PAR-CLIP	miRTarbase
hsa-miR-3605-5p	DDX3X	PAR-CLIP	miRTarbase
hsa-miR-3605-5p	DDX3X	PAR-CLIP	miRTarbase
hsa-miR-486-3p	DAZAP2	PAR-CLIP	miRTarbase
hsa-miR-141-3p	CYP1B1	PAR-CLIP	miRTarbase
hsa-miR-219a-1-3p	CTNND1	PAR-CLIP	miRTarbase
hsa-miR-486-3p	CTDNEP1	PAR-CLIP	miRTarbase
hsa-miR-195-5p	CPSF7	PAR-CLIP	miRTarbase
hsa-miR-195-5p	CPSF7	PAR-CLIP	miRTarbase
hsa-miR-195-5p	CPSF7	PAR-CLIP	miRTarbase
hsa-miR-15a-5p	CPSF7	PAR-CLIP	miRTarbase
hsa-miR-15a-5p	CPSF7	PAR-CLIP	miRTarbase
hsa-miR-15a-5p	CPSF7	PAR-CLIP	miRTarbase
hsa-miR-3613-3p	COIL	PAR-CLIP	miRTarbase
hsa-miR-3613-3p	COIL	PAR-CLIP	miRTarbase
hsa-miR-3613-3p	COIL	PAR-CLIP	miRTarbase
hsa-miR-15a-5p	CDK6	PAR-CLIP	miRTarbase
hsa-miR-195-3p	CDC25A	PAR-CLIP	miRTarbase
hsa-miR-219a-1-3p	CCNF	PAR-CLIP	miRTarbase
hsa-miR-195-5p	CARD10	PAR-CLIP	miRTarbase
hsa-miR-15a-5p	CARD10	PAR-CLIP	miRTarbase
hsa-miR-486-3p	CALR	PAR-CLIP	miRTarbase
hsa-miR-486-3p	CAD	PAR-CLIP	miRTarbase
hsa-miR-3605-5p	C16orf72	PAR-CLIP	miRTarbase
hsa-miR-3605-5p	C16orf72	PAR-CLIP	miRTarbase
hsa-miR-3605-5p	C16orf72	PAR-CLIP	miRTarbase
hsa-miR-486-3p	BAZ2A	PAR-CLIP	miRTarbase
hsa-miR-195-5p	AVL9	PAR-CLIP	miRTarbase
hsa-miR-195-5p	AVL9	PAR-CLIP	miRTarbase
hsa-miR-195-5p	AVL9	PAR-CLIP	miRTarbase
hsa-miR-15a-5p	AVL9	PAR-CLIP	miRTarbase
hsa-miR-15a-5p	AVL9	PAR-CLIP	miRTarbase
hsa-miR-15a-5p	AVL9	PAR-CLIP	miRTarbase
hsa-miR-486-3p	ATXN7L3B	PAR-CLIP	miRTarbase
hsa-miR-486-3p	ATXN7L3B	PAR-CLIP	miRTarbase
hsa-miR-486-3p	ATXN7L3	PAR-CLIP	miRTarbase
hsa-miR-195-3p	ARL6IP1	PAR-CLIP	miRTarbase
hsa-miR-195-3p	ARL6IP1	PAR-CLIP	miRTarbase
hsa-miR-195-3p	ARL6IP1	PAR-CLIP	miRTarbase
hsa-miR-195-3p	ARL6IP1	PAR-CLIP	miRTarbase
hsa-miR-3613-5p	ARID1A	PAR-CLIP	miRTarbase
hsa-miR-3605-5p	ANKRD50	PAR-CLIP	miRTarbase
hsa-miR-195-5p	AKT3	PAR-CLIP	miRTarbase
hsa-miR-195-5p	AKT3	PAR-CLIP	miRTarbase
hsa-miR-15a-5p	AGO2	PAR-CLIP	miRTarbase
hsa-miR-195-5p	AGO2	PAR-CLIP	miRTarbase
hsa-miR-141-5p	ADRB1	PAR-CLIP	miRTarbase
hsa-miR-141-5p	ADRB1	PAR-CLIP	miRTarbase
hsa-miR-141-5p	ADRB1	PAR-CLIP	miRTarbase
hsa-miR-141-5p	ADRB1	PAR-CLIP	miRTarbase
hsa-miR-141-5p	ADRB1	PAR-CLIP	miRTarbase
hsa-miR-3605-5p	ADAR	PAR-CLIP	miRTarbase
hsa-miR-3605-5p	ADAR	PAR-CLIP	miRTarbase
hsa-miR-3613-3p	ACTB	PAR-CLIP	miRTarbase
hsa-miR-3613-3p	ACTB	PAR-CLIP	miRTarbase
hsa-miR-195-5p	ABL2	PAR-CLIP	miRTarbase
hsa-miR-195-5p	ABL2	PAR-CLIP	miRTarbase
hsa-miR-195-5p	ABL2	PAR-CLIP	miRTarbase
hsa-miR-195-5p	ABL2	PAR-CLIP	miRTarbase
hsa-miR-195-5p	ABL2	PAR-CLIP	miRTarbase
hsa-miR-15a-5p	ABL2	PAR-CLIP	miRTarbase
hsa-miR-15a-5p	ABL2	PAR-CLIP	miRTarbase
hsa-miR-15a-5p	ABL2	PAR-CLIP	miRTarbase
hsa-miR-15a-5p	ABL2	PAR-CLIP	miRTarbase
hsa-miR-15a-5p	ABL2	PAR-CLIP	miRTarbase
hsa-miR-195-5p	ABHD2	PAR-CLIP	miRTarbase
hsa-miR-15a-5p	ABHD2	PAR-CLIP	miRTarbase
hsa-miR-486-3p	COPZ1	PAR-CLIP	miRTarbase
hsa-miR-195-3p	SH3BP5	PAR-CLIP	miRTarbase
hsa-miR-219a-1-3p	PIP4K2A	PAR-CLIP	miRTarbase
hsa-miR-486-3p	HIVEP3	PAR-CLIP	miRTarbase
hsa-miR-486-3p	HIVEP3	PAR-CLIP	miRTarbase
hsa-miR-15a-3p	TAGLN2	PAR-CLIP	miRTarbase
hsa-miR-486-3p	CASKIN1	PAR-CLIP	miRTarbase
hsa-miR-486-3p	CASKIN1	PAR-CLIP	miRTarbase
hsa-miR-3613-3p	TGIF1	PAR-CLIP	miRTarbase
hsa-miR-3613-3p	TGIF1	HITS-CLIP	miRTarbase
hsa-miR-219a-1-3p	SUGT1	PAR-CLIP	miRTarbase
hsa-miR-219a-1-3p	SUGT1	PAR-CLIP	miRTarbase
hsa-miR-195-5p	ABCC6	PAR-CLIP	miRTarbase
hsa-miR-195-5p	ABCC6	PAR-CLIP	miRTarbase
hsa-miR-15a-5p	ABCC6	PAR-CLIP	miRTarbase
hsa-miR-15a-5p	ABCC6	PAR-CLIP	miRTarbase
hsa-miR-219a-1-3p	ZNF652	PAR-CLIP	miRTarbase
hsa-miR-3613-3p	ZFYVE26	PAR-CLIP	miRTarbase
hsa-miR-3613-3p	ZFYVE26	PAR-CLIP	miRTarbase
hsa-miR-15a-5p	PRKAR2A	PAR-CLIP	miRTarbase
hsa-miR-15a-5p	PRKAR2A	PAR-CLIP	miRTarbase
hsa-miR-15a-5p	PRKAR2A	PAR-CLIP	miRTarbase
hsa-miR-15a-5p	PRKAR2A	PAR-CLIP	miRTarbase
hsa-miR-195-5p	PRKAR2A	PAR-CLIP	miRTarbase
hsa-miR-195-5p	PRKAR2A	PAR-CLIP	miRTarbase
hsa-miR-195-5p	PRKAR2A	PAR-CLIP	miRTarbase
hsa-miR-195-5p	PRKAR2A	PAR-CLIP	miRTarbase
hsa-miR-3613-3p	DICER1	PAR-CLIP	miRTarbase
hsa-miR-3613-3p	DICER1	PAR-CLIP	miRTarbase
hsa-miR-15a-3p	CASP16	PAR-CLIP	miRTarbase
hsa-miR-15a-3p	CASP16	PAR-CLIP	miRTarbase
hsa-miR-15a-3p	CASP16	PAR-CLIP	miRTarbase
hsa-miR-15a-3p	CASP16	PAR-CLIP	miRTarbase
hsa-miR-15a-3p	CASP16	PAR-CLIP	miRTarbase
hsa-miR-486-3p	PPP1R14A	PAR-CLIP	miRTarbase
hsa-miR-3613-5p	UBBP4	PAR-CLIP	miRTarbase
hsa-miR-486-3p	RXRA	PAR-CLIP	miRTarbase
hsa-miR-3613-3p	CNOT4	PAR-CLIP	miRTarbase
hsa-miR-3613-3p	CNOT4	PAR-CLIP	miRTarbase
hsa-miR-3613-3p	CNOT4	PAR-CLIP	miRTarbase
hsa-miR-486-3p	SCARF2	PAR-CLIP	miRTarbase
hsa-miR-195-5p	C10orf54	PAR-CLIP	miRTarbase
hsa-miR-15a-5p	C10orf54	PAR-CLIP	miRTarbase
hsa-miR-486-3p	BRSK2	PAR-CLIP	miRTarbase
hsa-miR-486-3p	BRSK2	PAR-CLIP	miRTarbase
hsa-miR-486-3p	CASZ1	PAR-CLIP	miRTarbase
hsa-miR-486-3p	CASZ1	PAR-CLIP	miRTarbase
hsa-miR-486-3p	CST9	PAR-CLIP	miRTarbase
hsa-miR-486-3p	POU3F1	PAR-CLIP	miRTarbase
hsa-miR-486-3p	PAX2	PAR-CLIP	miRTarbase
hsa-miR-3613-5p	VPS13B	PAR-CLIP	miRTarbase
hsa-miR-3613-5p	VPS13B	PAR-CLIP	miRTarbase
hsa-miR-141-3p	BICD2	PAR-CLIP	miRTarbase
hsa-miR-141-3p	BICD2	PAR-CLIP	miRTarbase
hsa-miR-486-3p	POFUT2	PAR-CLIP	miRTarbase
hsa-miR-486-3p	PTGES	PAR-CLIP	miRTarbase
hsa-miR-486-3p	B4GALNT4	PAR-CLIP	miRTarbase
hsa-miR-486-3p	B4GALNT4	PAR-CLIP	miRTarbase
hsa-miR-486-3p	SYNGR1	PAR-CLIP	miRTarbase
hsa-miR-486-3p	SYNGR1	PAR-CLIP	miRTarbase
hsa-miR-486-3p	SHMT1	PAR-CLIP	miRTarbase
hsa-miR-486-3p	SHMT1	PAR-CLIP	miRTarbase
hsa-miR-486-3p	KRT80	PAR-CLIP	miRTarbase
hsa-miR-486-3p	KRT80	PAR-CLIP	miRTarbase
hsa-miR-3605-5p	ANK1	PAR-CLIP	miRTarbase
hsa-miR-3605-5p	ANK1	PAR-CLIP	miRTarbase
hsa-miR-486-3p	SRCIN1	PAR-CLIP	miRTarbase
hsa-miR-486-3p	STRN4	PAR-CLIP	miRTarbase
hsa-miR-486-3p	MRPL34	PAR-CLIP	miRTarbase
hsa-miR-486-3p	GFER	PAR-CLIP	miRTarbase
hsa-miR-486-3p	MNT	PAR-CLIP	miRTarbase
hsa-miR-486-3p	MNT	PAR-CLIP	miRTarbase
hsa-miR-486-5p	UBASH3B	PAR-CLIP	miRTarbase
hsa-miR-195-5p	PHYHIP	PAR-CLIP	miRTarbase
hsa-miR-15a-5p	PHYHIP	PAR-CLIP	miRTarbase
hsa-miR-486-3p	NAV1	PAR-CLIP	miRTarbase
hsa-miR-3605-5p	GRAP2	PAR-CLIP	miRTarbase
hsa-miR-486-3p	ENG	PAR-CLIP	miRTarbase
hsa-miR-141-5p	ECT2	PAR-CLIP	miRTarbase
hsa-miR-195-5p	CASKIN1	PAR-CLIP	miRTarbase
hsa-miR-15a-5p	CASKIN1	PAR-CLIP	miRTarbase
hsa-miR-486-3p	SOLH	PAR-CLIP	miRTarbase
hsa-miR-486-3p	BCL7A	PAR-CLIP	miRTarbase
hsa-miR-486-3p	AP1G1	PAR-CLIP	miRTarbase
hsa-miR-15a-3p	TRADD	PAR-CLIP	miRTarbase
hsa-miR-195-5p	ZNRF1	PAR-CLIP	miRTarbase
hsa-miR-15a-5p	ZNRF1	PAR-CLIP	miRTarbase
hsa-miR-15a-3p	LONRF3	PAR-CLIP	miRTarbase
hsa-miR-3605-5p	PLEKHA3	PAR-CLIP	miRTarbase
hsa-miR-3613-3p	SMAD2	PAR-CLIP	miRTarbase
hsa-miR-3613-3p	SMAD2	HITS-CLIP	miRTarbase
hsa-miR-15a-3p	SLC1A5	PAR-CLIP	miRTarbase
hsa-miR-3613-3p	EIF3H	PAR-CLIP	miRTarbase
hsa-miR-15a-3p	UQCR10	PAR-CLIP	miRTarbase
hsa-miR-15a-3p	AGBL3	PAR-CLIP	miRTarbase
hsa-miR-15a-3p	CLCN6	PAR-CLIP	miRTarbase
hsa-miR-15a-3p	DPY19L1	PAR-CLIP	miRTarbase
hsa-miR-3613-3p	ZNF641	PAR-CLIP	miRTarbase
hsa-miR-15a-3p	FBXO41	PAR-CLIP	miRTarbase
hsa-miR-195-5p	CD180	PAR-CLIP	miRTarbase
hsa-miR-15a-5p	CD180	PAR-CLIP	miRTarbase
hsa-miR-15a-3p	SLC36A1	PAR-CLIP	miRTarbase
hsa-miR-15a-3p	SH3BGRL	PAR-CLIP	miRTarbase
hsa-miR-3613-3p	PARVB	PAR-CLIP	miRTarbase
hsa-miR-486-3p	TAGLN	PAR-CLIP	miRTarbase
hsa-miR-3613-3p	WNT2B	PAR-CLIP	miRTarbase
hsa-miR-3613-3p	NPM3	PAR-CLIP	miRTarbase
hsa-miR-3613-3p	AAED1	PAR-CLIP	miRTarbase
hsa-miR-3613-3p	AAED1	HITS-CLIP	miRTarbase
hsa-miR-486-3p	RALY	PAR-CLIP	miRTarbase
hsa-miR-3605-5p	SLC23A1	PAR-CLIP	miRTarbase
hsa-miR-3613-3p	DAZAP1	PAR-CLIP	miRTarbase
hsa-miR-195-5p	KIAA0895	PAR-CLIP	miRTarbase
hsa-miR-15a-5p	KIAA0895	PAR-CLIP	miRTarbase
hsa-miR-141-5p	SNX5	PAR-CLIP	miRTarbase
hsa-miR-141-5p	SNX5	PAR-CLIP	miRTarbase
hsa-miR-141-5p	SNX5	PAR-CLIP	miRTarbase
hsa-miR-486-5p	RCOR3	PAR-CLIP	miRTarbase
hsa-miR-141-3p	PRELID2	PAR-CLIP	miRTarbase
hsa-miR-15a-3p	PRMT3	PAR-CLIP	miRTarbase
hsa-miR-486-3p	KRT8	PAR-CLIP	miRTarbase
hsa-miR-15a-3p	RPL37A	PAR-CLIP	miRTarbase
hsa-miR-195-5p	ORC4	PAR-CLIP	miRTarbase
hsa-miR-195-5p	ORC4	PAR-CLIP	miRTarbase
hsa-miR-195-5p	ORC4	PAR-CLIP	miRTarbase
hsa-miR-195-5p	ORC4	PAR-CLIP	miRTarbase
hsa-miR-15a-5p	ORC4	PAR-CLIP	miRTarbase
hsa-miR-15a-5p	ORC4	PAR-CLIP	miRTarbase
hsa-miR-15a-5p	ORC4	PAR-CLIP	miRTarbase
hsa-miR-15a-5p	ORC4	PAR-CLIP	miRTarbase
hsa-miR-486-3p	RFWD3	PAR-CLIP	miRTarbase
hsa-miR-195-5p	ODF2L	PAR-CLIP	miRTarbase
hsa-miR-195-5p	ODF2L	PAR-CLIP	miRTarbase
hsa-miR-195-5p	ODF2L	PAR-CLIP	miRTarbase
hsa-miR-195-5p	ODF2L	PAR-CLIP	miRTarbase
hsa-miR-15a-5p	ODF2L	PAR-CLIP	miRTarbase
hsa-miR-15a-5p	ODF2L	PAR-CLIP	miRTarbase
hsa-miR-15a-5p	ODF2L	PAR-CLIP	miRTarbase
hsa-miR-15a-5p	ODF2L	PAR-CLIP	miRTarbase
hsa-miR-195-5p	DNAJA1	PAR-CLIP	miRTarbase
hsa-miR-195-5p	DNAJA1	PAR-CLIP//HITS-CLIP	miRTarbase
hsa-miR-195-5p	DNAJA1	PAR-CLIP	miRTarbase
hsa-miR-195-5p	DNAJA1	PAR-CLIP	miRTarbase
hsa-miR-15a-5p	DNAJA1	PAR-CLIP	miRTarbase
hsa-miR-15a-5p	DNAJA1	PAR-CLIP//HITS-CLIP	miRTarbase
hsa-miR-15a-5p	DNAJA1	PAR-CLIP	miRTarbase
hsa-miR-15a-5p	DNAJA1	PAR-CLIP	miRTarbase
hsa-miR-3613-3p	KCTD2	PAR-CLIP	miRTarbase
hsa-miR-3613-3p	KCTD2	PAR-CLIP	miRTarbase
hsa-miR-195-5p	L2HGDH	PAR-CLIP	miRTarbase
hsa-miR-195-5p	L2HGDH	PAR-CLIP	miRTarbase
hsa-miR-195-5p	L2HGDH	PAR-CLIP	miRTarbase
hsa-miR-195-5p	L2HGDH	PAR-CLIP	miRTarbase
hsa-miR-15a-5p	L2HGDH	PAR-CLIP	miRTarbase
hsa-miR-15a-5p	L2HGDH	PAR-CLIP	miRTarbase
hsa-miR-15a-5p	L2HGDH	PAR-CLIP	miRTarbase
hsa-miR-15a-5p	L2HGDH	PAR-CLIP	miRTarbase
hsa-miR-219a-1-3p	POLD3	PAR-CLIP	miRTarbase
hsa-miR-219a-1-3p	POLD3	PAR-CLIP//HITS-CLIP	miRTarbase
hsa-miR-219a-1-3p	POLD3	PAR-CLIP	miRTarbase
hsa-miR-219a-1-3p	POLD3	PAR-CLIP	miRTarbase
hsa-miR-15a-5p	ZNF622	PAR-CLIP	miRTarbase
hsa-miR-15a-5p	ZNF622	PAR-CLIP	miRTarbase
hsa-miR-15a-5p	ZNF622	HITS-CLIP	miRTarbase
hsa-miR-15a-5p	ZNF622	PAR-CLIP	miRTarbase
hsa-miR-15a-5p	ZNF622	PAR-CLIP	miRTarbase
hsa-miR-195-5p	ZNF622	PAR-CLIP	miRTarbase
hsa-miR-195-5p	ZNF622	PAR-CLIP	miRTarbase
hsa-miR-195-5p	ZNF622	HITS-CLIP	miRTarbase
hsa-miR-195-5p	ZNF622	PAR-CLIP	miRTarbase
hsa-miR-195-5p	ZNF622	PAR-CLIP	miRTarbase
hsa-miR-195-5p	ZMAT3	PAR-CLIP	miRTarbase
hsa-miR-195-5p	ZMAT3	PAR-CLIP	miRTarbase
hsa-miR-15a-5p	ZMAT3	PAR-CLIP	miRTarbase
hsa-miR-15a-5p	ZMAT3	PAR-CLIP	miRTarbase
hsa-miR-195-5p	USP53	PAR-CLIP	miRTarbase
hsa-miR-15a-5p	USP53	PAR-CLIP	miRTarbase
hsa-miR-141-3p	USP53	PAR-CLIP	miRTarbase
hsa-miR-15a-5p	SYPL1	PAR-CLIP	miRTarbase
hsa-miR-15a-5p	SYPL1	PAR-CLIP	miRTarbase
hsa-miR-15a-5p	SYPL1	PAR-CLIP	miRTarbase
hsa-miR-15a-5p	SYPL1	PAR-CLIP	miRTarbase
hsa-miR-195-5p	SYPL1	PAR-CLIP	miRTarbase
hsa-miR-195-5p	SYPL1	PAR-CLIP	miRTarbase
hsa-miR-195-5p	SYPL1	PAR-CLIP	miRTarbase
hsa-miR-195-5p	SYPL1	PAR-CLIP	miRTarbase
hsa-miR-219a-1-3p	STARD13	PAR-CLIP	miRTarbase
hsa-miR-219a-1-3p	STARD13	PAR-CLIP	miRTarbase
hsa-miR-15a-5p	SRPR	PAR-CLIP	miRTarbase
hsa-miR-15a-5p	SRPR	HITS-CLIP	miRTarbase
hsa-miR-15a-5p	SRPR	HITS-CLIP	miRTarbase
hsa-miR-15a-5p	SRPR	PAR-CLIP	miRTarbase
hsa-miR-195-5p	SRPR	PAR-CLIP	miRTarbase
hsa-miR-195-5p	SRPR	HITS-CLIP	miRTarbase
hsa-miR-195-5p	SRPR	HITS-CLIP	miRTarbase
hsa-miR-195-5p	SRPR	PAR-CLIP	miRTarbase
hsa-miR-195-5p	SREK1	PAR-CLIP	miRTarbase
hsa-miR-195-5p	SREK1	PAR-CLIP//HITS-CLIP	miRTarbase
hsa-miR-195-5p	SREK1	PAR-CLIP	miRTarbase
hsa-miR-195-5p	SREK1	PAR-CLIP	miRTarbase
hsa-miR-15a-5p	SREK1	PAR-CLIP	miRTarbase
hsa-miR-15a-5p	SREK1	PAR-CLIP//HITS-CLIP	miRTarbase
hsa-miR-15a-5p	SREK1	PAR-CLIP	miRTarbase
hsa-miR-15a-5p	SREK1	PAR-CLIP	miRTarbase
hsa-miR-3613-3p	SPTSSA	PAR-CLIP	miRTarbase
hsa-miR-3613-3p	SMEK1	PAR-CLIP	miRTarbase
hsa-miR-195-5p	SMAD7	PAR-CLIP	miRTarbase
hsa-miR-195-5p	SMAD7	PAR-CLIP	miRTarbase
hsa-miR-195-5p	SMAD7	PAR-CLIP	miRTarbase
hsa-miR-195-5p	SMAD7	PAR-CLIP	miRTarbase
hsa-miR-15a-5p	SMAD7	PAR-CLIP	miRTarbase
hsa-miR-15a-5p	SMAD7	PAR-CLIP	miRTarbase
hsa-miR-15a-5p	SMAD7	PAR-CLIP	miRTarbase
hsa-miR-15a-5p	SMAD7	PAR-CLIP	miRTarbase
hsa-miR-195-5p	PRICKLE2	PAR-CLIP	miRTarbase
hsa-miR-15a-5p	PRICKLE2	PAR-CLIP	miRTarbase
hsa-miR-486-3p	NSD1	PAR-CLIP	miRTarbase
hsa-miR-195-5p	LRIG2	PAR-CLIP	miRTarbase
hsa-miR-15a-5p	LRIG2	PAR-CLIP	miRTarbase
hsa-miR-195-5p	KIF5B	PAR-CLIP	miRTarbase
hsa-miR-195-5p	KIF5B	PAR-CLIP	miRTarbase
hsa-miR-195-5p	KIF5B	HITS-CLIP	miRTarbase
hsa-miR-195-5p	KIF5B	PAR-CLIP	miRTarbase
hsa-miR-195-5p	KIF5B	PAR-CLIP	miRTarbase
hsa-miR-15a-5p	KIF5B	PAR-CLIP	miRTarbase
hsa-miR-15a-5p	KIF5B	PAR-CLIP	miRTarbase
hsa-miR-15a-5p	KIF5B	HITS-CLIP	miRTarbase
hsa-miR-15a-5p	KIF5B	PAR-CLIP	miRTarbase
hsa-miR-15a-5p	KIF5B	PAR-CLIP	miRTarbase
hsa-miR-141-3p	HNRNPF	PAR-CLIP	miRTarbase
hsa-miR-141-3p	HNRNPF	PAR-CLIP	miRTarbase
[truncated: 14,036 more rows]
