# Supplementary material for: Methylome-based cell-of-origin modeling (Methyl-COOM) identifies aberrant expression of immune regulatory molecules in CLL
Source: Genome Med. 2020 Mar 18;12:29. doi: 10.1186/s13073-020-00724-7 (PMC7081711; doi:10.1186/s13073-020-00724-7)
Supplement: Supplementary file 6 — Table S5, list of epigenetic regulators. [file 13073_2020_724_MOESM6_ESM.xlsx]

## Sheet: Sheet 1
Supplementary Table S5: List of epigenetic regulators
Gene.ID	Group	Subgroup	CMM_for.NGR.Epigenetic_Function	Data.browser	Function
ACTL6A	Chromatin remodeling	nucleosome remodeling factors		IDA
ACTL6B	Chromatin remodeling	chromatin remodeling factors	chromatin remodelling	TAS
AICDA	DNA modifications	editors	DNA demethylation	HEMD
ALKBH1	DNA modifications	editors	DNA demethylation	HEMD
ALKBH3	DNA modifications	editors	DNA demethylation DNA repair	HEMD	Direct reversal of damage
ANKRD28	Histone modification	Editors	Histone dephosphorylation	HEMD
ANKRD44	Histone modification	Editors	Histone dephosphorylation	HEMD
ANKRD52	Histone modification	Editors	Histone dephosphorylation	HEMD
APOBEC1	DNA modifications	editors	DNA demethylation	HEMD
ARID1A	Not assigned	Not assigned	reg. of gene expression, epigenetic	IDA
ASXL1	Not assigned	Not assigned	methylation, chromatin	UCSC
ARIP4	Chromatin remodeling	Chromatin remodeling helicase	Chromatin remodeling helicase	HEMD
ASH1L	Histone modification	Writers	Histone methylation	HEMD
ASH2L	Histone modification	Readers	Readers	IDA
ASZ1	DNA modifications	writers	DNA methylation	IEA
ATM	Histone modification	Writers	Histone phosphorylation DNA repair	HEMD	Genes defective in diseases associated with sensitivity to DNA damaging agents
ATR	Histone modification	Writers	Histone phosphorylation DNA repair	HEMD	Other conserved DNA damage response genes
ATRX	Chromatin remodeling	Chromatin remodeling helicase	Chromatin remodeling helicase	HEMD
ATXN7	Histone modification	Readers	Readers	IDA
ATXN7L3	Histone modification	Readers	Readers	UCSC
BAHD1	Chromatin remodeling	chromatin remodeling factors	chromatin remodelling	IMP
BAP1	Histone modification	Editors	Histone deubiquitination	HEMD
BAP18	Chromatin remodeling	nucleosome remodeling factors		IEA
BARD1	Histone modification	Writers	Histone ubiquitination	HEMD
BAZ1B	Histone modification	Writers	Histone phosphorylation	HEMD
BAZ2A	Chromatin remodeling	chromatin remodeling factors	chromatin remodelling	TAS
BNIP3	Chromatin remodeling	chromatin remodeling factors	chromatin remodelling	IDA
BPTF	Chromatin remodeling	nucleosome remodeling factors		IDA
BRAC1	Histone modification	Writers	Histone ubiquitination	HEMD
BRCA2	Histone modification	Writers	Histone ubiquitination DNA repair	HEMD	Fanconi anemia
BRCC36	Histone modification	Editors	Histone deubiquitination	HEMD
BRD1	Histone modification	Readers	Readers	IDA
BRDT	Chromatin remodeling	chromatin remodeling factors	chromatin remodelling	NAS
BRE1A	Histone modification	Writers	Histone ubiquitination	HEMD
BRE1B	Histone modification	Writers	Histone ubiquitination	HEMD
BRG1	Chromatin remodeling	Chromatin remodeling helicase	Chromatin remodeling helicase	HEMD
BRPF3	Histone modification	Readers	Readers	IEA
BTAF1	Chromatin remodeling	Chromatin remodeling helicase	Chromatin remodeling helicase	HEMD
BTD	Histone modification	Writers	Histone biotinylation	HEMD
BUB1	Histone modification	Writers	Histone phosphorylation	HEMD
CARM1	Histone modification	Writers	Histone methylation	HEMD
CASC5	Chromatin remodeling	chromatin remodeling factors	chromatin remodelling	NAS
CBX3	Chromatin remodeling	chromatin remodeling factors	chromatin remodelling	IMP
CBX4	Histone modification	Readers	Readers	UCSC
CDK17	Histone modification	Writers	Histone phosphorylation	HEMD
CDK2	Histone modification	Writers	Histone phosphorylation	HEMD
CDK3	Histone modification	Writers	Histone phosphorylation	HEMD
CDK5	Histone modification	Writers	Histone phosphorylation	HEMD
CDK8	Histone modification	Writers	Histone phosphorylation	HEMD
CDKN2A	Chromatin remodeling	chromatin remodeling factors	chromatin remodelling	IMP
CDY1	Histone modification	Writers	Histone acetylation	HEMD
CDY2	Histone modification	Writers	Histone acetylation	HEMD
CDYL	Histone modification	Writers	Histone acetylation	HEMD
CENPA	Chromatin remodeling	chromatin remodeling factors	chromatin remodelling	NAS
CENPH	Chromatin remodeling	chromatin remodeling factors	chromatin remodelling	TAS
CENPI	Chromatin remodeling	chromatin remodeling factors	chromatin remodelling	ISS
CENPK	Chromatin remodeling	chromatin remodeling factors	chromatin remodelling	IEA
CENPN	Chromatin remodeling	chromatin remodeling factors	chromatin remodelling	IEA
CENPO	Chromatin remodeling	chromatin remodeling factors	chromatin remodelling	TAS
CENPP	Chromatin remodeling	chromatin remodeling factors	chromatin remodelling	TAS
CENPQ	Chromatin remodeling	chromatin remodeling factors	chromatin remodelling	TAS
CENPV	Chromatin remodeling	chromatin remodeling factors	chromatin remodelling	TAS
CHD1	Histone modification	Readers	Readers	HEMD
CHD1L	Chromatin remodeling	Chromatin remodeling helicase	Chromatin remodeling helicase	HEMD
CHD2	Chromatin remodeling	Chromatin remodeling helicase	Chromatin remodeling helicase	HEMD
CHD3	Histone modification	Readers	Readers	HEMD
CHD4	Histone modification	Readers	Readers	HEMD
CHD5	Histone modification	Readers	Readers	HEMD
CHD6	Chromatin remodeling	Chromatin remodeling helicase	Chromatin remodeling helicase	HEMD
CHD7	Chromatin remodeling	Chromatin remodeling helicase	Chromatin remodeling helicase	HEMD
CHD8	Histone modification	Readers	Readers	HEMD
CHD9	Chromatin remodeling	Chromatin remodeling helicase	Chromatin remodeling helicase	HEMD
CHEK1	Chromatin remodeling	chromatin remodeling factors	chromatin remodelling DNA repair	TAS	Other conserved DNA damage response genes
Chk1	Histone modification	Writers	Histone phosphorylation	HEMD
CHRAC1	Chromatin remodeling	chromatin remodeling factors	chromatin remodelling	TAS
CHUK	Histone modification	Writers	Histone phosphorylation	HEMD
CLOCK	Histone modification	Writers	Histone acetylation	HEMD
CREBBP	Histone modification	Writers	Histone acetylation	HEMD
CSRP2BP	Histone modification	Readers	Readers	TAS
CXXC1	Histone modification	Readers	Readers	IDA
DAPK3	Histone modification	Writers	Histone phosphorylation	HEMD
DDB1	Histone modification	Writers	Histone ubiquitination DNA repair	HEMD	Nucleotide excision repair (NER)
DDB2	Histone modification	Writers	Histone ubiquitination DNA repair	HEMD	Nucleotide excision repair (NER)
DMAP1	Histone modification	Readers	Readers	NAS
DNMT1	DNA modifications	writers	DNA Methyltransferase (DNMTs)	HEMD
DNMT3A	DNA modifications	writers	DNA Methyltransferase (DNMTs)	HEMD
DNMT3B	DNA modifications	writers	DNA Methyltransferase (DNMTs)	HEMD
DNMT3L	DNA modifications	writers	DNA methylation	HEMD
DOT1L	Histone modification	Writers	Histone methylation	HEMD
DPF1	Chromatin remodeling	nucleosome remodeling factors	histone binding	NAS
DPF2	Chromatin remodeling	nucleosome remodeling factors	histone binding	NAS
DTX3L	Histone modification	Writers	Histone ubiquitination	HEMD
DUSP1	Histone modification	Editors	Histone dephosphorylation	HEMD
DZIP3	Histone modification	Writers	Histone ubiquitination	HEMD
EED	Histone modification	Readers	Readers	HEMD
EHMT1	Histone modification	Writers	Histone methylation	HEMD
EHMT2	Histone modification	Writers	Histone methylation	HEMD
ELP3	Histone modification	Writers	Histone acetylation	HEMD
ELP4	Chromatin remodeling	chromatin remodeling factors	histone organization	IDA
EP300	Histone modification	Writers	Histone acetylation	HEMD
EP400	Histone modification	Readers	Readers	HEMD
EPC1	Histone modification	Readers	Readers	IDA
EPC2	Histone modification	Readers	Readers	UCSC
ERCC6	Chromatin remodeling	Chromatin remodeling helicase	Chromatin remodeling helicase DNA repair	HEMD	Nucleotide excision repair (NER)
EVI1	Histone modification	Writers	Histone methylation	HEMD
EYA1	Histone modification	Editors	Histone dephosphorylation	HEMD
EYA2	Histone modification	Editors	Histone dephosphorylation	HEMD
EYA3	Histone modification	Editors	Histone dephosphorylation	HEMD
EYA4	Histone modification	Editors	Histone dephosphorylation	HEMD
EZH1	Histone modification	Writers	Histone methylation	HEMD
EZH2	Histone modification	Writers	Histone methylation	HEMD
FOS	DNA modifications	writers	DNA methylation	ISS
FOXA1	Chromatin remodeling	chromatin remodeling factors	chromatin remodelling	TAS
FSHR	Chromatin remodeling	chromatin remodeling factors	chromatin remodelling	NAS
FTO	DNA modifications	editors	DNA demethylation	HEMD
FYN	Histone modification	Writers	Histone phosphorylation	HEMD
GADD45A	DNA modifications	editors	DNA demethylation	HEMD
GADD45B	DNA modifications	editors	DNA demethylation	HEMD
GATAD2A	Histone modification	Readers	Readers	TAS
GATAD2B	Histone modification	Readers	Readers	IDA
GNAS	DNA modifications	writers	DNA methylation	TAS
GSG2	Histone modification	Writers	Histone phosphorylation	HEMD
GSK3B	Histone modification	Writers	Histone phosphorylation	HEMD
GTF3C4	Histone modification	Writers	Histone acetylation	HEMD
H1F0	Histone modification	Histones	histones	UCSC
H1FNT	Histone modification	Histones	histones	UCSC
H1FOO	Histone modification	Histones	histones	UCSC
H1FX	Histone modification	Histones	histones	UCSC
H2AFB2	Histone modification	Histones	histones	UCSC
H2AFB3	Histone modification	Histones	histones	UCSC
H2AFJ	Histone modification	Histones	histones	UCSC
H2AFV	Histone modification	Histones	histones	UCSC
H2AFX	Histone modification	Histones	Histones	UCSC	Chromatin Structure and Modification
H2AFY	Histone modification	Histones	Histones	IDA
H2AFY2	Histone modification	Histones	Histones	IDA
H2AFZ	Histone modification	Histones	histones	UCSC
H2BFWT	Histone modification	Histones	histones	UCSC
H3F3B	Histone modification	Histones	histones	UCSC
H3F3C	Histone modification	Histones	histones	UCSC
HAT1	Histone modification	Writers	Histone acetylation	HEMD
HCFC1	Histone modification	Readers	Readers	IDA
HDAC1	Histone modification	Editors	Histone Deacetylase (HDACs)	HEMD
HDAC10	Histone modification	Editors	Histone Deacetylase (HDACs)	HEMD
HDAC11	Histone modification	Editors	Histone Deacetylase (HDACs)	HEMD
HDAC2	Histone modification	Editors	Histone Deacetylase (HDACs)	HEMD
HDAC3	Histone modification	Editors	Histone Deacetylase (HDACs)	HEMD
HDAC4	Histone modification	Editors	Histone Deacetylase (HDACs)	HEMD
HDAC5	Histone modification	Editors	Histone Deacetylase (HDACs)	HEMD
HDAC6	Histone modification	Editors	Histone Deacetylase (HDACs)	HEMD
HDAC7	Histone modification	Editors	Histone Deacetylase (HDACs)	HEMD
HDAC8	Histone modification	Editors	Histone Deacetylase (HDACs)	HEMD
HDAC9	Histone modification	Editors	Histone Deacetylase (HDACs)	HEMD
HELLS	Chromatin remodeling	Chromatin remodeling helicase	Chromatin remodeling helicase	HEMD
HILS1	Chromatin remodeling	chromatin remodeling factors	chromatin remodelling	IEA
HIST1H2AA	Histone modification	Histones	Histones	UCSC
HIST1H2AB	Histone modification	Histones	histones	UCSC
HIST1H2AC	Histone modification	Histones	histones	UCSC
HIST1H2AD	Histone modification	Histones	histones	UCSC
HIST1H2AE	Histone modification	Histones	histones	UCSC
HIST1H2AG	Histone modification	Histones	histones	UCSC
HIST1H2AH	Histone modification	Histones	histones	UCSC
HIST1H2AJ	Histone modification	Histones	histones	UCSC
HIST1H2AK	Histone modification	Histones	histones	UCSC
HIST1H2AL	Histone modification	Histones	Histones	UCSC
HIST1H2AM	Histone modification	Histones	histones	UCSC
HIST1H2BA	Histone modification	Histones	Histones	UCSC
HIST1H2BB	Histone modification	Histones	histones	UCSC
HIST1H2BC	Histone modification	Histones	histones	UCSC
HIST1H2BD	Histone modification	Histones	histones	UCSC
HIST1H2BE	Histone modification	Histones	histones	UCSC
HIST1H2BF	Histone modification	Histones	histones	UCSC
HIST1H2BG	Histone modification	Histones	histones	UCSC
HIST1H2BH	Histone modification	Histones	histones	UCSC
HIST1H2BI	Histone modification	Histones	histones	UCSC
HIST1H2BJ	Histone modification	Histones	Histones	UCSC
HIST1H2BK	Histone modification	Histones	histones	UCSC
HIST1H2BL	Histone modification	Histones	histones	UCSC
HIST1H2BM	Histone modification	Histones	histones	UCSC
HIST1H2BN	Histone modification	Histones	histones	UCSC
HIST1H2BO	Histone modification	Histones	histones	UCSC
HIST1H3A	Histone modification	Histones	Histones	UCSC
HIST1H3B	Histone modification	Histones	histones	UCSC
HIST1H3C	Histone modification	Histones	histones	UCSC
HIST1H3D	Histone modification	Histones	histones	UCSC
HIST1H3E	Histone modification	Histones	histones	UCSC
HIST1H3F	Histone modification	Histones	histones	UCSC
HIST1H3G	Histone modification	Histones	histones	UCSC
HIST1H3H	Histone modification	Histones	histones	UCSC
HIST1H3I	Histone modification	Histones	histones	UCSC
HIST1H3J	Histone modification	Histones	histones	UCSC
HIST1H4A	Histone modification	Histones	Histones	UCSC
HIST1H4B	Histone modification	Histones	histones	UCSC
HIST1H4C	Histone modification	Histones	histones	UCSC
HIST1H4D	Histone modification	Histones	histones	UCSC
HIST1H4E	Histone modification	Histones	histones	UCSC
HIST1H4F	Histone modification	Histones	histones	UCSC
HIST1H4G	Histone modification	Histones	histones	UCSC
HIST1H4H	Histone modification	Histones	histones	UCSC
HIST1H4I	Histone modification	Histones	histones	UCSC
HIST1H4J	Histone modification	Histones	histones	UCSC
HIST1H4K	Histone modification	Histones	Histones	UCSC
HIST1H4L	Histone modification	Histones	histones	UCSC
HIST2H2AA3	Histone modification	Histones	Histones	UCSC
HIST2H2AB	Histone modification	Histones	histones	UCSC
HIST2H2AC	Histone modification	Histones	histones	UCSC
HIST2H2BE	Histone modification	Histones	Histones	UCSC
HIST2H2BF	Histone modification	Histones	histones	UCSC
HIST2H3C	Histone modification	Histones	Histones	UCSC
HIST2H3D	Histone modification	Histones	histones	UCSC
HIST2H4A	Chromatin remodeling	chromatin remodeling factors	chromatin remodelling	NAS
HIST3H2A	Histone modification	Histones	histones	UCSC
HIST3H2BB	Histone modification	Histones	histones	UCSC
HIST3H3	Histone modification	Histones	Histones	UCSC
HIST4H4	Histone modification	Histones	Histones	UCSC
HJURP	Chromatin remodeling	chromatin remodeling factors	chromatin remodelling	IC
HLCS	Histone modification	Writers	Histone biotinylation	HEMD
HLTF	Chromatin remodeling	nucleosome remodeling factors		HEMD	Ubiquitination and modification
HMGA1	Chromatin remodeling	chromatin remodeling factors	chromatin remodelling	IDA
HNF1A	Chromatin remodeling	chromatin remodeling factors	chromatin remodelling	IDA
HUWE1	Histone modification	Writers	Histone ubiquitination	HEMD
IDH1	DNA modifications	writers	DNA methylation	TAS
IDH2	DNA modifications	writers	DNA methylation	ISS
ING2	Histone modification	Readers	Readers	UCSC
ING3	Histone modification	Readers	Readers	IDA
INO80	Chromatin remodeling	Chromatin remodeling helicase	Chromatin remodeling helicase	HEMD
ITGB3BP	Chromatin remodeling	chromatin remodeling factors	chromatin remodelling	IDA
JAK2	Histone modification	Writers	Histone phosphorylation	HEMD
JMJD1C	Histone modification	Editors	Histone demethylation	HEMD
JMJD6	Histone modification	Editors	Histone demethylation	HEMD
KANSL1	Chromatin remodeling	chromatin remodeling factors	histone organization	IDA
KANSL2	Chromatin remodeling	chromatin remodeling factors	histone organization	IDA
KANSL3	Chromatin remodeling	chromatin remodeling factors	histone organization	IDA
KAT2A	Histone modification	Writers	Histone acetylation	HEMD
KAT2B	Histone modification	Writers	Histone acetylation	HEMD
KAT5	Histone modification	Writers	Histone acetylation	HEMD
KAT8	Chromatin remodeling	chromatin remodeling factors	histone organization	IDA
KDM1A	Histone modification	Editors	Histone demethylation	HEMD
KDM1B	Histone modification	Editors	Histone demethylation	HEMD
KDM2A	Histone modification	Editors	Histone demethylation	HEMD
KDM2B	Histone modification	Editors	Histone demethylation	HEMD
KDM3A	Histone modification	Editors	Histone demethylation	HEMD
KDM3B	Histone modification	Editors	Histone demethylation	HEMD
KDM4A	Histone modification	Editors	Histone demethylation	HEMD
KDM4B	Histone modification	Editors	Histone demethylation	HEMD
KDM4C	Histone modification	Editors	Histone demethylation	HEMD
KDM4D	Histone modification	Editors	Histone demethylation	HEMD
KDM5A	Histone modification	Editors	Histone demethylation	HEMD
KDM5B	Histone modification	Editors	Histone demethylation	HEMD
KDM5C	Histone modification	Editors	Histone demethylation	HEMD
KDM5D	Histone modification	Editors	Histone demethylation	HEMD
KDM6A	Histone modification	Editors	Histone demethylation	HEMD
KDM6B	Histone modification	Editors	Histone demethylation	HEMD
KDM7	Histone modification	Editors	Histone demethylation	HEMD
KDM8	Histone modification	Editors	Histone demethylation	HEMD
KLF1	Chromatin remodeling	chromatin remodeling factors	chromatin remodelling	IDA
L3MBTL2	Histone modification	Readers	Readers	UCSC
LIMK2	Histone modification	Writers	Histone phosphorylation	HEMD
MAEL	DNA modifications	writers	DNA methylation
MAP3K12	Histone modification	Writers	Histone phosphorylation	HEMD
MAP3K8	Histone modification	Writers	Histone phosphorylation	HEMD
MASTL	Histone modification	Writers	Histone phosphorylation	HEMD
MBD1	DNA modifications	readers	DNA methylation	UCSC
MBD2	Histone modification	Readers	Readers	HEMD
MBD3	DNA modifications	readers	DNA methylation	HEMD
MBD4	DNA modifications	readers	DNA methylation	HEMD	Base excision repair (BER)
MBIP	Histone modification	Readers	Readers	IDA
MCRS1	Chromatin remodeling	nucleosome remodeling factors		IDA
Mdm2	Histone modification	Writers	Histone ubiquitination	HEMD
MEAF6	Histone modification	Readers	Readers	IDA
MECP2	DNA modifications	readers	DNA methylation	UCSC
MEN1	Histone modification	Readers	Readers	IEA
MGMT	DNA modifications	writers	DNA methylation DNA repair	IMP	Direct reversal of damage
MIS18A	Chromatin remodeling	chromatin remodeling factors	chromatin remodelling	IDA
MIS18BP1	Chromatin remodeling	chromatin remodeling factors	chromatin remodelling	IBA
MIZF	DNA modifications	writers	DNA methylation	NAS
MLF1IP	Chromatin remodeling	chromatin remodeling factors	chromatin remodelling	TAS
MLL	Histone modification	Writers	Histone methylation	HEMD
MLL2	Histone modification	Writers	Histone methylation	HEMD
MLL3	Histone modification	Writers	Histone methylation	HEMD
MLL4	Histone modification	Writers	Histone methylation	HEMD
MLL5	Histone modification	Writers	Histone methylation	HEMD
MLT	Histone modification	Writers	Histone phosphorylation	HEMD
MORF4L1	Histone modification	Readers	Readers	IDA
MORF4L2	Histone modification	Readers	Readers	UCSC
MTA1	Histone modification	Readers	Readers	NAS
MTA2	Histone modification	Readers	Readers	UCSC
MTA3	Histone modification	Readers	Readers	NAS
MYB	Chromatin remodeling	chromatin remodeling factors	chromatin remodelling	IMP
MYC	Chromatin remodeling	chromatin remodeling factors	chromatin remodelling	NAS
MYSM1	Histone modification	Editors	Histone deubiquitination	HEMD
MYST1	Histone modification	Writers	Histone acetylation	HEMD
MYST2	Histone modification	Writers	Histone acetylation	HEMD
MYST3	Histone modification	Writers	Histone acetylation	HEMD
MYST4	Histone modification	Writers	Histone acetylation	HEMD
NAP1L3	Chromatin remodeling	nucleosome remodeling factors	nucleosome assembly proteins	NAS
NAP1L4	Chromatin remodeling	nucleosome remodeling factors	nucleosome assembly proteins	NAS
NASP	Chromatin remodeling	chromatin remodeling factors	chromatin remodelling	NAS
NAT10	Histone modification	Writers	Histone acetylation	HEMD
NCOA1	Histone modification	Writers	Histone acetylation	HEMD
NCOA2	Histone modification	Writers	Histone acetylation	HEMD
NCOA3	Histone modification	Writers	Histone acetylation	HEMD
NCOAT	Histone modification	Editors	Histone de-O-GlcNAcylation	HEMD
Nek6	Histone modification	Writers	Histone phosphorylation	HEMD
Nek9	Histone modification	Writers	Histone phosphorylation	HEMD
NFRKB	Chromatin remodeling	nucleosome remodeling factors		UCSC
NIPBL	Histone modification	Readers	Readers	IEA
NO66	Histone modification	Editors	Histone demethylation	HEMD
NPM1	Chromatin remodeling	chromatin remodeling factors	chromatin remodelling	IEA
NPM2	Chromatin remodeling	chromatin remodeling factors	chromatin remodelling	IEA
NR3C1	Chromatin remodeling	chromatin remodeling factors	chromatin remodelling	IBA
NSD1	Histone modification	Writers	Histone methylation	HEMD
NSD2	Histone modification	Writers	Histone methylation	HEMD
NSD3	Histone modification	Writers	Histone methylation	HEMD
OGT	Histone modification	Writers	Histone O-GlcNAcylation	HEMD
OIP5	Chromatin remodeling	chromatin remodeling factors	chromatin remodelling	NAS
PADI4	Histone modification	Writers	Histone citrullination	HEMD
PAK1	Histone modification	Writers	Histone phosphorylation	HEMD
PAK2	Histone modification	Writers	Histone phosphorylation	HEMD
PARG	Histone modification	Editors	Histone de-ADP-ribosylation	HEMD
PARP1	Histone modification	Writers	Histone ADP-ribosylation DNA repair	HEMD	Poly(ADP-ribose) polymerase (PARP) enzymes that bind to DNA
PARP2	Histone modification	Writers	Histone ADP-ribosylation DNA repair	HEMD	Poly(ADP-ribose) polymerase (PARP) enzymes that bind to DNA
PARP3	Histone modification	Writers	Histone ADP-ribosylation DNA repair	HEMD	Poly(ADP-ribose) polymerase (PARP) enzymes that bind to DNA
PBK	Histone modification	Writers	Histone phosphorylation	HEMD
PBRM1	Chromatin remodeling	chromatin remodeling factors	chromatin remodelling	TAS
PCGF6	Histone modification	Readers	Readers	IEA
PCNA	DNA modifications	readers	DNA methylation		FANCA
PHF10	Chromatin remodeling	chromatin remodeling factors	chromatin-remodeling complex	NAS
PHF15	Histone modification	Readers	Readers	IDA
PHF16	Histone modification	Readers	Readers	IEA
PHF17	Histone modification	Readers	Readers	IMP
PHF20	Chromatin remodeling	chromatin remodeling factors	histone organization	IDA
PHF8	Histone modification	Editors	Histone demethylation	HEMD
PKN1	Histone modification	Writers	Histone phosphorylation	HEMD
PPM1D	Histone modification	Editors	Histone dephosphorylation	HEMD
PPP1CA	Histone modification	Editors	Histone dephosphorylation	HEMD
PPP1CB	Histone modification	Editors	Histone dephosphorylation	HEMD
PPP1CC	Histone modification	Editors	Histone dephosphorylation	HEMD
PPP2CA	Histone modification	Editors	Histone dephosphorylation	HEMD
PPP2CB	Histone modification	Editors	Histone dephosphorylation	HEMD
PPP2R1A	Histone modification	Editors	Histone dephosphorylation	HEMD
PPP2R1B	Histone modification	Editors	Histone dephosphorylation	HEMD
PPP2R2A	Histone modification	Editors	Histone dephosphorylation	HEMD
PPP2R2B	Histone modification	Editors	Histone dephosphorylation	HEMD
PPP2R2C	Histone modification	Editors	Histone dephosphorylation	HEMD
PPP2R2D	Histone modification	Editors	Histone dephosphorylation	HEMD
PPP2R3A	Histone modification	Editors	Histone dephosphorylation	HEMD
PPP2R3B	Histone modification	Editors	Histone dephosphorylation	HEMD
PPP2R3C	Histone modification	Editors	Histone dephosphorylation	HEMD
PPP2R4	Histone modification	Editors	Histone dephosphorylation	HEMD
PPP2R5A	Histone modification	Editors	Histone dephosphorylation	HEMD
PPP2R5B	Histone modification	Editors	Histone dephosphorylation	HEMD
PPP2R5C	Histone modification	Editors	Histone dephosphorylation	HEMD
PPP2R5D	Histone modification	Editors	Histone dephosphorylation	HEMD
PPP2R5E	Histone modification	Editors	Histone dephosphorylation	HEMD
PPP3CA	Histone modification	Editors	Histone dephosphorylation	HEMD
PPP3CB	Histone modification	Editors	Histone dephosphorylation	HEMD
PPP3CC	Histone modification	Editors	Histone dephosphorylation	HEMD
PPP4C	Histone modification	Editors	Histone dephosphorylation	HEMD
PPP4R1	Histone modification	Editors	Histone dephosphorylation	HEMD
PPP4R2	Histone modification	Editors	Histone dephosphorylation	HEMD
PPP4R4	Histone modification	Editors	Histone dephosphorylation	HEMD
PPP5C	Histone modification	Editors	Histone dephosphorylation	HEMD
PPP6C	Histone modification	Editors	Histone dephosphorylation	HEMD
PPP6R1	Histone modification	Editors	Histone dephosphorylation	HEMD
PPP6R2	Histone modification	Editors	Histone dephosphorylation	HEMD
PPP6R3	Histone modification	Editors	Histone dephosphorylation	HEMD
PRDM2	Histone modification	Writers	Histone methylation	HEMD
PRDM6	Histone modification	Writers	Histone methylation	HEMD
PRDM7	Histone modification	Writers	Histone methylation	HEMD
PRDM9	Histone modification	Writers	Histone methylation	HEMD
PRKAA1	Histone modification	Writers	Histone phosphorylation	HEMD
PRKAA2	Histone modification	Writers	Histone phosphorylation	HEMD
PRKAB1	Histone modification	Writers	Histone phosphorylation	HEMD
PRKAB2	Histone modification	Writers	Histone phosphorylation	HEMD
PRKAG1	Histone modification	Writers	Histone phosphorylation	HEMD
PRKAG2	Histone modification	Writers	Histone phosphorylation	HEMD
PRKAG3	Histone modification	Writers	Histone phosphorylation	HEMD
PRKCA	Histone modification	Writers	Histone phosphorylation	HEMD
PRKCB	Histone modification	Writers	Histone phosphorylation	HEMD
PRKDC	Histone modification	Writers	Histone phosphorylation DNA repair	HEMD	Non-homologous end-joining
PRMT1	Histone modification	Writers	Histone methylation	HEMD
PRMT10	Histone modification	Writers	Histone methylation	HEMD
PRMT11	Histone modification	Writers	Histone methylation	HEMD
PRMT12	Histone modification	Writers	Histone methylation	HEMD
PRMT13	Histone modification	Writers	Histone methylation	HEMD
PRMT14	Histone modification	Writers	Histone methylation	HEMD
PRMT15	Histone modification	Writers	Histone methylation	HEMD
PRMT16	Histone modification	Writers	Histone methylation	HEMD
PRMT2	Histone modification	Writers	Histone methylation	HEMD
PRMT3	Histone modification	Writers	Histone methylation	HEMD
PRMT4	Histone modification	Writers	Histone methylation	HEMD
PRMT5	Histone modification	Writers	Histone methylation	HEMD
PRMT6	Histone modification	Writers	Histone methylation	HEMD
PRMT7	Histone modification	Writers	Histone methylation	HEMD
PRMT8	Histone modification	Writers	Histone methylation	HEMD
RAD54B	Chromatin remodeling	Chromatin remodeling helicase	Chromatin remodeling helicase DNA repair	HEMD	Homologous recombination
RAD54L	Chromatin remodeling	Chromatin remodeling helicase	Chromatin remodeling helicase DNA repair	HEMD	Homologous recombination
RAG1	Histone modification	Writers	Histone ubiquitination	HEMD
RB1	Chromatin remodeling	chromatin remodeling factors	chromatin remodelling	IEA
RBBP4	Chromatin remodeling	chromatin remodeling factors	chromatin remodelling	IDA
RBBP5	Histone modification	Readers	Readers	IDA
RBBP7	Chromatin remodeling	chromatin remodeling factors	chromatin remodelling	TAS
RBX1	Histone modification	Writers	Histone ubiquitination	HEMD
RERE	Chromatin remodeling	chromatin remodeling factors	chromatin remodelling	ISS
RING1	Histone modification	Writers	Histone ubiquitination	HEMD
RING2	Histone modification	Writers	Histone ubiquitination	HEMD
RNF168	Histone modification	Writers	Histone ubiquitination DNA repair	HEMD	Ubiquitination and modification
RNF20	Histone modification	Writers	Histone ubiquitination	IDA
RNF8	Histone modification	Writers	Histone ubiquitination DNA repair	HEMD	Ubiquitination and modification
RPS6KA3	Histone modification	Writers	Histone phosphorylation	HEMD
RPS6KA4	Histone modification	Writers	Histone phosphorylation	HEMD
RPS6KA5	Histone modification	Writers	Histone phosphorylation	HEMD
RSF1	Chromatin remodeling	chromatin remodeling factors	chromatin remodelling	TAS
RUVBL1	Histone modification	Readers	Readers	TAS
RUVBL2	Histone modification	Readers	Readers	IMP
SAE1	Histone modification	Writers	Histone sumoylation	HEMD
SAE2	Histone modification	Writers	Histone sumoylation	HEMD
SALL1	Chromatin remodeling	chromatin remodeling factors	histone organization	IDA
SAP130	Histone modification	Readers	Readers	IDA
SATB2	Chromatin remodeling	chromatin remodeling factors	chromatin remodelling	TAS
SETD1A	Histone modification	Readers	Readers	HEMD
SETD1B	Histone modification	Readers	Readers	HEMD
SETD2	Histone modification	Writers	Histone methylation	HEMD
SETD3	Histone modification	Writers	Histone methylation	HEMD
SETD5	Histone modification	Writers	Histone methylation	HEMD
SETD7	Histone modification	Writers	Histone methylation	HEMD
SETD8	Histone modification	Writers	Histone methylation	HEMD
SETDB1	Histone modification	Writers	Histone methylation	HEMD
SETDB2	Histone modification	Writers	Histone methylation	HEMD
SETMAR	Histone modification	Writers	Histone methylation DNA repair	HEMD	Chromatin Structure and Modification
SIRT1	Histone modification	Editors	Histone Deacetylase (HDACs)	HEMD
SIRT2	Histone modification	Editors	Histone Deacetylase (HDACs)	HEMD
SIRT3	Histone modification	Editors	Histone Deacetylase (HDACs)	HEMD
SIRT4	Histone modification	Editors	Histone Deacetylase (HDACs)	HEMD
SIRT5	Histone modification	Editors	Histone Deacetylase (HDACs)	HEMD
SIRT6	Histone modification	Editors	Histone Deacetylase (HDACs)	HEMD
SIRT7	Histone modification	Editors	Histone Deacetylase (HDACs)	HEMD
SMARCA1	Chromatin remodeling	Chromatin remodeling helicase	Chromatin remodeling helicase	HEMD
SMARCA2	Chromatin remodeling	Chromatin remodeling helicase	Chromatin remodeling helicase	HEMD
SMARCA5	Histone modification	Readers	Readers	HEMD
SMARCAD1	Chromatin remodeling	Chromatin remodeling helicase	Chromatin remodeling helicase	HEMD
SMARCAL1	Chromatin remodeling	Chromatin remodeling helicase	Chromatin remodeling helicase	HEMD
SMARCC1	Chromatin remodeling	chromatin remodeling factors	chromatin remodelling	TAS
SMARCC2	Chromatin remodeling	chromatin remodeling factors	chromatin remodelling	IEA
SMARCD1	Chromatin remodeling	chromatin remodeling factors	chromatin remodelling	IEA
SMARCD2	Chromatin remodeling	chromatin remodeling factors	chromatin remodelling	TAS
SMARCD3	Chromatin remodeling	chromatin remodeling factors	chromatin remodelling	IDA
SMARCE1	Chromatin remodeling	chromatin remodeling factors	chromatin remodelling	IEA
SMCHD1	Histone modification	Readers	Readers	IMP
SMEK1	Histone modification	Editors	Histone dephosphorylation	HEMD
SMEK2	Histone modification	Editors	Histone dephosphorylation	HEMD
SMYD1	Histone modification	Writers	Histone methylation	HEMD
SMYD3	Histone modification	Writers	Histone methylation	HEMD
SMYD4	Histone modification	Writers	Histone methylation	HEMD
SMYD5	Histone modification	Writers	Histone methylation	HEMD
SOX9	Chromatin remodeling	chromatin remodeling factors	chromatin remodelling	IDA
SPI1	DNA modifications	writers	DNA methylation, negative regulation of histone H4 acetylation	IDA
SRCAP	Chromatin remodeling	Chromatin remodeling helicase	Chromatin remodeling helicase	HEMD
STK10	Histone modification	Writers	Histone phosphorylation	HEMD
STK12	Histone modification	Writers	Histone phosphorylation	HEMD
STK13	Histone modification	Writers	Histone phosphorylation	HEMD
STK4	Histone modification	Writers	Histone phosphorylation	HEMD
STK6	Histone modification	Writers	Histone phosphorylation	HEMD
SUDS3	Histone modification	Readers	Readers	UCSC
SUPT3H	Histone modification	Readers	Readers	IDA
SUPT4H1	Chromatin remodeling	chromatin remodeling factors	chromatin remodelling	IMP
SUPT5H	Chromatin remodeling	chromatin remodeling factors	chromatin remodelling	TAS
SUPT6H	Chromatin remodeling	chromatin remodeling factors	chromatin remodelling	TAS
SUPT7L	Histone modification	Readers	Readers	IDA
SUV39H1	Histone modification	Writers	Histone methylation	HEMD
SUV39H2	Histone modification	Writers	Histone methylation	HEMD
SUV420H1	Histone modification	Writers	Histone methylation	HEMD
SUV420H2	Histone modification	Writers	Histone methylation	HEMD
SUZ12	Histone modification	Readers	Readers	HEMD
SYCP3	Chromatin remodeling	chromatin remodeling factors	chromatin remodelling	TAS
TADA1	Chromatin remodeling	chromatin remodeling factors	histone organization	IDA
TADA2A	Chromatin remodeling	chromatin remodeling factors	histone organization	IDA
TADA3	Chromatin remodeling	chromatin remodeling factors	histone organization	IDA
TAF1	Histone modification	Readers	Readers	HEMD
TAF10	Histone modification	Readers	Readers	IDA
TAF12	Histone modification	Readers	Readers	IDA
TAF5	Histone modification	Readers	Readers	UCSC
TAF5L	Histone modification	Readers	Readers	IDA
TAF6L	Histone modification	Readers	Readers	IDA
TAF7	Histone modification	Readers	Readers	IDA
TAF9	Histone modification	Readers	Readers	IDA
TDG	DNA modifications	editors	DNA demethylation DNA repair	HEMD	Base excision repair (BER)
TET1	DNA modifications	editors	DNA demethylation	HEMD
TET2	DNA modifications	editors	DNA demethylation	HEMD
TET3	DNA modifications	editors	DNA demethylation	HEMD
TLK1	Histone modification	Writers	Histone phosphorylation	HEMD
TNP1	Chromatin remodeling	chromatin remodeling factors	chromatin remodelling	IEA
TOP1	Chromatin remodeling	chromatin remodeling factors	chromatin remodelling	TAS
TOP1MT	Chromatin remodeling	chromatin remodeling factors	chromatin remodelling	IEA
TP63	Chromatin remodeling	chromatin remodeling factors	chromatin remodelling	IDA
TRDMT1	DNA modifications	writers	DNA methylation	HEMD
TRIM24	Histone modification	Readers	Readers	UCSC
TRIM28	Chromatin remodeling	nucleosome remodeling factors		UCSC
TRRAP	Histone modification	Readers	Readers	ISS
TTF1	Chromatin remodeling	chromatin remodeling factors	chromatin remodelling	TAS
TTF2	Chromatin remodeling	Chromatin remodeling helicase	Chromatin remodeling helicase	HEMD
UBA1	Histone modification	Writers	Histone ubiquitination	HEMD
UBC9	Histone modification	Writers	Histone sumoylation	HEMD
UBE2A	Histone modification	Writers	Histone ubiquitination DNA repair	HEMD	Ubiquitination and modification
UBE2B	Histone modification	Writers	Histone ubiquitination DNA repair	HEMD	Ubiquitination and modification
UBE2E1	Histone modification	Writers	Histone ubiquitination	HEMD
UBE2H	Histone modification	Writers	Histone ubiquitination	HEMD
UBR2	Histone modification	Writers	Histone ubiquitination	HEMD
UHRF1	DNA modifications	readers	DNA methylation	HEMD
USP16	Histone modification	Editors	Histone deubiquitination	HEMD
USP21	Histone modification	Editors	Histone deubiquitination	HEMD
USP22	Histone modification	Readers	Readers	HEMD
USP3	Histone modification	Editors	Histone deubiquitination	HEMD
USP36	Histone modification	Editors	Histone deubiquitination	HEMD
USP7	Histone modification	Editors	Histone deubiquitination	HEMD
UTY	Histone modification	Editors	Histone demethylation	HEMD
VRK1	Histone modification	Writers	Histone phosphorylation	HEMD
WDR82	Chromatin remodeling	chromatin remodeling factors	histone organization	ISS
YEATS2	Histone modification	Readers	Readers	IDA
YEATS4	Histone modification	Readers	Readers	IDA
YY1	Chromatin remodeling	nucleosome remodeling factors		UCSC
ZFP57	DNA modifications	writers	DNA methylation
ARID1A	Not assigned	Not assigned	reg. of gene expression, epigenetic	IDA
ASXL1	Not assigned	Not assigned	methylation, chromatin	UCSC
DNMT1	DNA modifications	writers	DNA Methyltransferase (DNMTs)	HEMD
