# Supplementary material for: Methylome-based cell-of-origin modeling (Methyl-COOM) identifies aberrant expression of immune regulatory molecules in CLL
Source: Genome Med. 2020 Mar 18;12:29. doi: 10.1186/s13073-020-00724-7 (PMC7081711; doi:10.1186/s13073-020-00724-7)
Supplement: Supplementary file 7 — Table S6, list of epigenetic regulators being targeted by CLL-specific microRNAs. [file 13073_2020_724_MOESM7_ESM.xlsx]

## Sheet: Sheet 1
Supplementary Table S6: List of epigenetic regulators being targeted by CLL-specific microRNAs
miRNA	Target.Gene	Experiments	Database
hsa-miR-486-5p	H3F3B	PAR-CLIP	miRTarbase
hsa-miR-486-5p	H3F3B	PAR-CLIP	miRTarbase
hsa-miR-486-5p	H3F3B	qRT-PCR	miRTarbase
hsa-miR-486-5p	H3F3B	PAR-CLIP	miRTarbase
hsa-miR-486-5p	H3F3B	PAR-CLIP	miRTarbase
hsa-miR-486-5p	MBD4	PAR-CLIP	miRTarbase
hsa-miR-486-5p	CENPN	HITS-CLIP	miRTarbase
hsa-miR-486-5p	CDK17	HITS-CLIP	Tarbase
hsa-miR-486-5p	ATXN7L3	HITS-CLIP	Tarbase
hsa-miR-486-5p	BTAF1	PAR-CLIP	Tarbase
hsa-miR-486-5p	SIRT1	HITS-CLIP	Tarbase
hsa-miR-486-5p	SETD1A	PAR-CLIP	Tarbase
hsa-miR-486-5p	BNIP3L	PAR-CLIP	Tarbase
hsa-miR-486-5p	NR3C1	HITS-CLIP	Tarbase
hsa-miR-486-5p	ARID1A	HITS-CLIP	Tarbase
hsa-miR-486-5p	TNFRSF10B	HITS-CLIP	Tarbase
hsa-miR-486-5p	H3F3B	HITS-CLIP	Tarbase
hsa-miR-486-5p	H3F3B	HITS-CLIP	Tarbase
hsa-miR-486-5p	H3F3B	HITS-CLIP	Tarbase
hsa-miR-486-5p	NCOA2	HITS-CLIP	Tarbase
hsa-miR-486-5p	TAF1	HITS-CLIP	Tarbase
hsa-miR-486-5p	CHD1	PAR-CLIP	Tarbase
hsa-miR-486-5p	HLCS	Chimeric fragments	Tarbase
hsa-miR-486-5p	ATXN7L2	PAR-CLIP	Tarbase
hsa-miR-486-5p	JMJD1C	HITS-CLIP	Tarbase
hsa-miR-486-5p	KDM2A	PAR-CLIP	Tarbase
hsa-miR-486-5p	RUVBL1	PAR-CLIP	Tarbase
hsa-miR-486-5p	ATXN7L3B	HITS-CLIP	Tarbase
hsa-miR-486-3p	OGT	PAR-CLIP	miRTarbase
hsa-miR-486-3p	OGT	PAR-CLIP	miRTarbase
hsa-miR-486-3p	OGT	PAR-CLIP	miRTarbase
hsa-miR-486-3p	MEN1	PAR-CLIP	miRTarbase
hsa-miR-486-3p	MBD4	PAR-CLIP	miRTarbase
hsa-miR-486-3p	MBD4	PAR-CLIP	miRTarbase
hsa-miR-486-3p	MBD4	PAR-CLIP	miRTarbase
hsa-miR-486-3p	BAZ2A	PAR-CLIP	miRTarbase
hsa-miR-486-3p	ATXN7L3B	PAR-CLIP	miRTarbase
hsa-miR-486-3p	ATXN7L3B	PAR-CLIP	miRTarbase
hsa-miR-486-3p	ATXN7L3	PAR-CLIP	miRTarbase
hsa-miR-486-3p	CASZ1	PAR-CLIP	miRTarbase
hsa-miR-486-3p	CASZ1	PAR-CLIP	miRTarbase
hsa-miR-486-3p	NSD1	PAR-CLIP	miRTarbase
hsa-miR-486-3p	MTA1	HITS-CLIP	miRTarbase
hsa-miR-486-3p	ATXN7L3	HITS-CLIP	Tarbase
hsa-miR-486-3p	SUV39H1	HITS-CLIP	Tarbase
hsa-miR-486-3p	CHD6	HITS-CLIP	Tarbase
hsa-miR-486-3p	HIST1H2BD	HITS-CLIP	Tarbase
hsa-miR-486-3p	TUBA1C	HITS-CLIP	Tarbase
hsa-miR-486-3p	TUBA1C	HITS-CLIP	Tarbase
hsa-miR-486-3p	KDM2A	HITS-CLIP	Tarbase
hsa-miR-486-3p	PRMT6	HITS-CLIP	Tarbase
hsa-miR-486-3p	HIST1H2BH	HITS-CLIP	Tarbase
hsa-miR-3613-5p	PRKAA1	PAR-CLIP	miRTarbase
hsa-miR-3613-5p	H3F3C	PAR-CLIP	miRTarbase
hsa-miR-3613-5p	H3F3C	PAR-CLIP	miRTarbase
hsa-miR-3613-5p	ARID1A	PAR-CLIP	miRTarbase
hsa-miR-3613-5p	YY1	PAR-CLIP	miRTarbase
hsa-miR-3613-5p	TNFRSF13C	HITS-CLIP	miRTarbase
hsa-miR-3613-5p	SMARCE1	HITS-CLIP	Tarbase
hsa-miR-3613-5p	MLLT10	PAR-CLIP	Tarbase
hsa-miR-3613-5p	EYA1	HITS-CLIP	Tarbase
hsa-miR-3613-5p	CHD4	HITS-CLIP	Tarbase
hsa-miR-3613-5p	NR3C1	PAR-CLIP	Tarbase
hsa-miR-3613-5p	NR3C1	PAR-CLIP	Tarbase
hsa-miR-3613-5p	NR3C1	PAR-CLIP	Tarbase
hsa-miR-3613-5p	HIST1H2BJ	HITS-CLIP	Tarbase
hsa-miR-3613-5p	KDM5C	PAR-CLIP	Tarbase
hsa-miR-3613-5p	KDM4B	HITS-CLIP	Tarbase
hsa-miR-3613-5p	CLOCK	HITS-CLIP	Tarbase
hsa-miR-3613-5p	EPC2	PAR-CLIP	Tarbase
hsa-miR-3613-5p	CARM1	HITS-CLIP	Tarbase
hsa-miR-3613-5p	RERE	PAR-CLIP	Tarbase
hsa-miR-3613-5p	NIPBL	PAR-CLIP	Tarbase
hsa-miR-3613-5p	SETD5	HITS-CLIP	Tarbase
hsa-miR-3613-5p	HCFC1	HITS-CLIP	Tarbase
hsa-miR-3613-5p	SMARCC1	HITS-CLIP	Tarbase
hsa-miR-3613-5p	HIST1H2BN	PAR-CLIP	Tarbase
hsa-miR-3613-5p	PRKDC	HITS-CLIP	Tarbase
hsa-miR-3613-3p	CBX3	PAR-CLIP	miRTarbase
hsa-miR-3613-3p	CBX3	HITS-CLIP	miRTarbase
hsa-miR-3613-3p	TET3	PAR-CLIP	miRTarbase
hsa-miR-3613-3p	GADD45A	PAR-CLIP	miRTarbase
hsa-miR-3613-3p	UHRF1BP1L	PAR-CLIP	miRTarbase
hsa-miR-3613-3p	PTCHD1	PAR-CLIP	miRTarbase
hsa-miR-3613-3p	PTCHD1	PAR-CLIP	miRTarbase
hsa-miR-3613-3p	HAT1	PAR-CLIP	miRTarbase
hsa-miR-3613-3p	SMEK1	PAR-CLIP	miRTarbase
hsa-miR-3613-3p	GRB10	PAR-CLIP	miRTarbase
hsa-miR-3613-3p	GRB10	PAR-CLIP	miRTarbase
hsa-miR-3613-3p	GRB10	PAR-CLIP	miRTarbase
hsa-miR-3613-3p	ATRNL1	PAR-CLIP	miRTarbase
hsa-miR-3613-3p	RNF20	PAR-CLIP	miRTarbase
hsa-miR-3613-3p	CHD1	PAR-CLIP	miRTarbase
hsa-miR-3613-3p	CHD1	PAR-CLIP	miRTarbase
hsa-miR-3613-3p	YY1	PAR-CLIP	miRTarbase
hsa-miR-3613-3p	HUWE1	PAR-CLIP	miRTarbase
hsa-miR-3613-3p	MYBL1	PAR-CLIP	miRTarbase
hsa-miR-3613-3p	PARP15	HITS-CLIP	miRTarbase
hsa-miR-3613-3p	RNF207	HITS-CLIP	miRTarbase
hsa-miR-3613-3p	GSG2	HITS-CLIP	miRTarbase
hsa-miR-3613-3p	TNFRSF13C	HITS-CLIP	miRTarbase
hsa-miR-3613-3p	CENPH	HITS-CLIP	miRTarbase
hsa-miR-3613-3p	USP36	HITS-CLIP	Tarbase
hsa-miR-3613-3p	EED	HITS-CLIP	Tarbase
hsa-miR-3613-3p	NCOA1	PAR-CLIP	Tarbase
hsa-miR-3613-3p	EP300	HITS-CLIP	Tarbase
hsa-miR-3613-3p	DUSP1	HITS-CLIP	Tarbase
hsa-miR-3613-3p	TNFRSF10B	PAR-CLIP	Tarbase
hsa-miR-3613-3p	FOSB	HITS-CLIP	Tarbase
hsa-miR-3613-3p	RERE	HITS-CLIP	Tarbase
hsa-miR-3613-3p	SMARCA5	HITS-CLIP	Tarbase
hsa-miR-3613-3p	KDM1B	PAR-CLIP	Tarbase
hsa-miR-3613-3p	TET2	PAR-CLIP	Tarbase
hsa-miR-3613-3p	UBE2E1	Chimeric fragments	Tarbase
hsa-miR-3613-3p	CHD9	PAR-CLIP	Tarbase
hsa-miR-3613-3p	MORF4L1	HITS-CLIP	Tarbase
hsa-miR-3613-3p	USP7	PAR-CLIP	Tarbase
hsa-miR-3605-5p	KDM6A	PAR-CLIP	miRTarbase
hsa-miR-3605-5p	TNFRSF10D	PAR-CLIP	miRTarbase
hsa-miR-3605-5p	TNFRSF10B	PAR-CLIP	miRTarbase
hsa-miR-3605-5p	TNFRSF10B	PAR-CLIP	miRTarbase
hsa-miR-3605-5p	PPP2R5E	PAR-CLIP	miRTarbase
hsa-miR-3605-5p	MIS18BP1	PAR-CLIP//HITS-CLIP	miRTarbase
hsa-miR-3605-5p	PPP2R2A	PAR-CLIP	miRTarbase
hsa-miR-3605-5p	RSF1	HITS-CLIP	Tarbase
hsa-miR-3605-5p	KDM3A	HITS-CLIP	Tarbase
hsa-miR-3605-5p	MORF4L2	HITS-CLIP	Tarbase
hsa-miR-3605-5p	PRMT1	HITS-CLIP	Tarbase
hsa-miR-3605-5p	H3F3B	HITS-CLIP	Tarbase
hsa-miR-3605-5p	ANKRD52	HITS-CLIP	Tarbase
hsa-miR-3605-5p	ANKRD52	HITS-CLIP	Tarbase
hsa-miR-3605-5p	YEATS2	HITS-CLIP	Tarbase
hsa-miR-3605-5p	HCFC1	HITS-CLIP	Tarbase
hsa-miR-3605-5p	KREMEN1	HITS-CLIP	Tarbase
hsa-miR-3605-5p	HIST1H2AJ	HITS-CLIP	Tarbase
hsa-miR-3605-3p	KDM2B	HITS-CLIP	miRTarbase
hsa-miR-3605-3p	TRIM28	HITS-CLIP	Tarbase
hsa-miR-3605-3p	MYC	HITS-CLIP	Tarbase
hsa-miR-3605-3p	ANKRD52	HITS-CLIP	Tarbase
hsa-miR-3605-3p	PRKCA	HITS-CLIP	Tarbase
hsa-miR-3605-3p	CHD3	HITS-CLIP	Tarbase
hsa-miR-3605-3p	TAF7	HITS-CLIP	Tarbase
hsa-miR-3605-3p	TAF15	HITS-CLIP	Tarbase
hsa-miR-219a-1-3p	NCOA3	PAR-CLIP	miRTarbase
hsa-miR-219a-1-3p	H2AFX	PAR-CLIP	miRTarbase
hsa-miR-219a-1-3p	H2AFX	PAR-CLIP	miRTarbase
hsa-miR-219a-1-3p	CREBBP	PAR-CLIP	miRTarbase
hsa-miR-219a-1-3p	YY1	PAR-CLIP	miRTarbase
hsa-miR-219a-1-3p	GRB10	HITS-CLIP	Tarbase
hsa-miR-219a-1-3p	GTF3C4	HITS-CLIP	Tarbase
hsa-miR-219a-1-3p	OGT	HITS-CLIP	Tarbase
hsa-miR-219a-1-3p	CHEK1	HITS-CLIP	Tarbase
hsa-miR-219a-1-3p	TNFRSF11B	HITS-CLIP	Tarbase
hsa-miR-219a-1-3p	NFRKB	HITS-CLIP	Tarbase
hsa-miR-195-5p	MECP2	Microarray//Northern blot	miRTarbase
hsa-miR-195-5p	CHUK	Luciferase reporter assay	miRTarbase
hsa-miR-195-5p	MBD1	Luciferase reporter assay	miRTarbase
hsa-miR-195-5p	JAK2	CLASH	miRTarbase
hsa-miR-195-5p	MYB	Luciferase reporter assay//qRT-PCR//Western blot	miRTarbase
hsa-miR-195-5p	OGT	PAR-CLIP	miRTarbase
hsa-miR-195-5p	OGT	PAR-CLIP	miRTarbase
hsa-miR-195-5p	OGT	HITS-CLIP	miRTarbase
hsa-miR-195-5p	OGT	PAR-CLIP	miRTarbase
hsa-miR-195-5p	PAK2	PAR-CLIP	miRTarbase
hsa-miR-195-5p	EZH1	HITS-CLIP	miRTarbase
hsa-miR-195-5p	TET3	HITS-CLIP	miRTarbase
hsa-miR-195-5p	HMGA1	HITS-CLIP	miRTarbase
hsa-miR-195-5p	ATXN7L3B	PAR-CLIP	miRTarbase
hsa-miR-195-5p	ATXN7L3B	PAR-CLIP	miRTarbase
hsa-miR-195-5p	TBRG1	PAR-CLIP	miRTarbase
hsa-miR-195-5p	CHEK1	HITS-CLIP	miRTarbase
hsa-miR-195-5p	CHEK1	HITS-CLIP	miRTarbase
hsa-miR-195-5p	SIRT4	HITS-CLIP	miRTarbase
hsa-miR-195-5p	SETD1B	PAR-CLIP	miRTarbase
hsa-miR-195-5p	PPP2R5C	PAR-CLIP	miRTarbase
hsa-miR-195-5p	PPP2R5C	PAR-CLIP	miRTarbase
hsa-miR-195-5p	MLLT6	HITS-CLIP	miRTarbase
hsa-miR-195-5p	RNF168	PAR-CLIP	miRTarbase
hsa-miR-195-5p	SRSF1	PAR-CLIP	miRTarbase
hsa-miR-195-5p	SRSF1	PAR-CLIP	miRTarbase
hsa-miR-195-5p	SRSF1	PAR-CLIP	miRTarbase
hsa-miR-195-5p	CBX4	PAR-CLIP	miRTarbase
hsa-miR-195-5p	CBX4	HITS-CLIP	miRTarbase
hsa-miR-195-5p	BAZ2A	PAR-CLIP	miRTarbase
hsa-miR-195-5p	SALL1	PAR-CLIP	miRTarbase
hsa-miR-195-5p	SALL1	PAR-CLIP	miRTarbase
hsa-miR-195-5p	MBD4	PAR-CLIP	miRTarbase
hsa-miR-195-5p	CDK17	PAR-CLIP	miRTarbase
hsa-miR-195-5p	CDK17	HITS-CLIP	miRTarbase
hsa-miR-195-5p	ASH1L	PAR-CLIP	miRTarbase
hsa-miR-195-5p	ASH1L	HITS-CLIP	miRTarbase
hsa-miR-195-5p	TAF13	PAR-CLIP	miRTarbase
hsa-miR-195-5p	TAF13	PAR-CLIP	miRTarbase
hsa-miR-195-5p	PRKAA1	PAR-CLIP	miRTarbase
hsa-miR-195-5p	PRKAA1	PAR-CLIP	miRTarbase
hsa-miR-195-5p	HIST2H2BE	PAR-CLIP	miRTarbase
hsa-miR-195-5p	TLK1	PAR-CLIP	miRTarbase
hsa-miR-195-5p	TLK1	HITS-CLIP	miRTarbase
hsa-miR-195-5p	UBE2H	PAR-CLIP	miRTarbase
hsa-miR-195-5p	USP3	HITS-CLIP	miRTarbase
hsa-miR-195-5p	USP31	HITS-CLIP	miRTarbase
hsa-miR-195-5p	RPS6KA3	HITS-CLIP	miRTarbase
hsa-miR-195-5p	PPP6C	HITS-CLIP	miRTarbase
hsa-miR-195-5p	GSK3B	HITS-CLIP	miRTarbase
hsa-miR-195-5p	CDKN2AIPNL	HITS-CLIP	miRTarbase
hsa-miR-195-5p	ASXL1	HITS-CLIP	miRTarbase
hsa-miR-195-5p	CREBBP	HITS-CLIP	Tarbase
hsa-miR-195-5p	TNFRSF12A	HITS-CLIP	Tarbase
hsa-miR-195-5p	TNFRSF12A	Microarrays	Tarbase
hsa-miR-195-5p	MATR3	HITS-CLIP	Tarbase
hsa-miR-195-5p	MATR3	HITS-CLIP	Tarbase
hsa-miR-195-5p	MATR3	HITS-CLIP	Tarbase
hsa-miR-195-5p	CENPQ	Microarrays	Tarbase
hsa-miR-195-5p	CDK17	HITS-CLIP	Tarbase
hsa-miR-195-5p	TAF11	Microarrays	Tarbase
hsa-miR-195-5p	UHRF1BP1	PAR-CLIP	Tarbase
hsa-miR-195-5p	HEATR6	HITS-CLIP	Tarbase
hsa-miR-195-5p	PPP2R5B	Microarrays	Tarbase
hsa-miR-195-5p	JMJD6	Microarrays	Tarbase
hsa-miR-195-5p	MBD3	HITS-CLIP	Tarbase
hsa-miR-195-5p	CYBRD1	Microarrays	Tarbase
hsa-miR-195-5p	FOSL2	HITS-CLIP	Tarbase
hsa-miR-195-5p	FOSL2	HITS-CLIP	Tarbase
hsa-miR-195-5p	FOSL2	HITS-CLIP	Tarbase
hsa-miR-195-5p	BAZ2A	HITS-CLIP	Tarbase
hsa-miR-195-5p	PPP2R5C	HITS-CLIP	Tarbase
hsa-miR-195-5p	SRCAP	HITS-CLIP	Tarbase
hsa-miR-195-5p	RAD54L	Microarrays	Tarbase
hsa-miR-195-5p	HUWE1	HITS-CLIP	Tarbase
hsa-miR-195-5p	ATXN7L3	HITS-CLIP	Tarbase
hsa-miR-195-5p	ATXN7L3	PAR-CLIP	Tarbase
hsa-miR-195-5p	ATXN7L3	PAR-CLIP	Tarbase
hsa-miR-195-5p	ATXN7L3	HITS-CLIP	Tarbase
hsa-miR-195-5p	ATXN7L3	Microarrays	Tarbase
hsa-miR-195-5p	BTAF1	HITS-CLIP	Tarbase
hsa-miR-195-5p	BTAF1	HITS-CLIP	Tarbase
hsa-miR-195-5p	BTAF1	HITS-CLIP	Tarbase
hsa-miR-195-5p	EP300	HITS-CLIP	Tarbase
hsa-miR-195-5p	RPS6KA5	HITS-CLIP	Tarbase
hsa-miR-195-5p	SMEK1	HITS-CLIP	Tarbase
hsa-miR-195-5p	MYBL2	Microarrays	Tarbase
hsa-miR-195-5p	SUV39H1	Microarrays	Tarbase
hsa-miR-195-5p	CENPI	Microarrays	Tarbase
hsa-miR-195-5p	USP31	PAR-CLIP	Tarbase
hsa-miR-195-5p	SALL1	HITS-CLIP	Tarbase
hsa-miR-195-5p	SALL1	HITS-CLIP	Tarbase
hsa-miR-195-5p	SALL1	HITS-CLIP	Tarbase
hsa-miR-195-5p	SALL1	Microarrays	Tarbase
hsa-miR-195-5p	OIP5	Microarrays	Tarbase
hsa-miR-195-5p	EYA1	Microarrays	Tarbase
hsa-miR-195-5p	PPP2CB	HITS-CLIP	Tarbase
hsa-miR-195-5p	PPP2R1A	HITS-CLIP	Tarbase
hsa-miR-195-5p	H2AFV	HITS-CLIP	Tarbase
hsa-miR-195-5p	EZH2	Microarrays	Tarbase
hsa-miR-195-5p	ATRNL1	Microarrays	Tarbase
hsa-miR-195-5p	CAMTA2	HITS-CLIP	Tarbase
hsa-miR-195-5p	EZH1	HITS-CLIP	Tarbase
hsa-miR-195-5p	PPARGC1A	Microarrays	Tarbase
hsa-miR-195-5p	CDK2AP1	HITS-CLIP	Tarbase
hsa-miR-195-5p	CHD4	HITS-CLIP	Tarbase
hsa-miR-195-5p	CHD4	HITS-CLIP	Tarbase
hsa-miR-195-5p	CHD4	HITS-CLIP	Tarbase
hsa-miR-195-5p	PPP2CA	HITS-CLIP	Tarbase
hsa-miR-195-5p	PPP2CA	HITS-CLIP	Tarbase
hsa-miR-195-5p	NR3C1	HITS-CLIP	Tarbase
hsa-miR-195-5p	KANSL3	Microarrays	Tarbase
hsa-miR-195-5p	ASH1L	PAR-CLIP	Tarbase
hsa-miR-195-5p	ASH1L	HITS-CLIP	Tarbase
hsa-miR-195-5p	ASH1L	HITS-CLIP	Tarbase
hsa-miR-195-5p	ASH1L	PAR-CLIP	Tarbase
hsa-miR-195-5p	MYB	HITS-CLIP	Tarbase
hsa-miR-195-5p	HEATR1	PAR-CLIP	Tarbase
hsa-miR-195-5p	PPP4R4	Microarrays	Tarbase
hsa-miR-195-5p	HELLS	HITS-CLIP	Tarbase
hsa-miR-195-5p	DUSP1	Microarrays	Tarbase
hsa-miR-195-5p	MASTL	Microarrays	Tarbase
hsa-miR-195-5p	EPC1	PAR-CLIP	Tarbase
hsa-miR-195-5p	TNFRSF10B	HITS-CLIP	Tarbase
hsa-miR-195-5p	CENPK	Microarrays	Tarbase
hsa-miR-195-5p	CDK2	Microarrays	Tarbase
hsa-miR-195-5p	HJURP	Microarrays	Tarbase
hsa-miR-195-5p	CHD6	HITS-CLIP	Tarbase
hsa-miR-195-5p	HIST1H2BJ	Microarrays	Tarbase
hsa-miR-195-5p	GTF3C4	HITS-CLIP	Tarbase
hsa-miR-195-5p	PARP2	Microarrays	Tarbase
hsa-miR-195-5p	HEATR5A	HITS-CLIP	Tarbase
hsa-miR-195-5p	KLF16	Microarrays	Tarbase
hsa-miR-195-5p	PHF10	Microarrays	Tarbase
hsa-miR-195-5p	MLLT4	HITS-CLIP	Tarbase
hsa-miR-195-5p	DNMT1	Microarrays	Tarbase
hsa-miR-195-5p	PRKAB2	HITS-CLIP	Tarbase
hsa-miR-195-5p	GRSF1	HITS-CLIP	Tarbase
hsa-miR-195-5p	NASP	Microarrays	Tarbase
hsa-miR-195-5p	SMYD5	HITS-CLIP	Tarbase
hsa-miR-195-5p	SMYD5	Microarrays	Tarbase
hsa-miR-195-5p	TAF5L	Microarrays	Tarbase
hsa-miR-195-5p	CDK5RAP2	Microarrays	Tarbase
hsa-miR-195-5p	MYC	qPCR	Tarbase
hsa-miR-195-5p	MYC	Western Blot	Tarbase
hsa-miR-195-5p	HMGA1	HITS-CLIP	Tarbase
hsa-miR-195-5p	HMGA1	HITS-CLIP	Tarbase
hsa-miR-195-5p	HMGA1	HITS-CLIP	Tarbase
hsa-miR-195-5p	PPP2R1B	HITS-CLIP	Tarbase
hsa-miR-195-5p	PPP2R1B	HITS-CLIP	Tarbase
hsa-miR-195-5p	PPP2R1B	HITS-CLIP	Tarbase
hsa-miR-195-5p	CASC5	Microarrays	Tarbase
hsa-miR-195-5p	CENPO	Microarrays	Tarbase
hsa-miR-195-5p	BARD1	HITS-CLIP	Tarbase
hsa-miR-195-5p	BARD1	Microarrays	Tarbase
hsa-miR-195-5p	ASNSD1	HITS-CLIP	Tarbase
hsa-miR-195-5p	PARP16	HITS-CLIP	Tarbase
hsa-miR-195-5p	PARP16	PAR-CLIP	Tarbase
hsa-miR-195-5p	PARP16	Microarrays	Tarbase
hsa-miR-195-5p	ZCRB1	HITS-CLIP	Tarbase
hsa-miR-195-5p	BRCA2	Microarrays	Tarbase
hsa-miR-195-5p	KANSL2	HITS-CLIP	Tarbase
hsa-miR-195-5p	ANKRD52	HITS-CLIP	Tarbase
hsa-miR-195-5p	ANKRD52	HITS-CLIP	Tarbase
hsa-miR-195-5p	ANKRD52	Microarrays	Tarbase
hsa-miR-195-5p	SETD1B	HITS-CLIP	Tarbase
hsa-miR-195-5p	CBX4	HITS-CLIP	Tarbase
hsa-miR-195-5p	CBX4	HITS-CLIP	Tarbase
hsa-miR-195-5p	CBX4	HITS-CLIP	Tarbase
hsa-miR-195-5p	CARM1	Microarrays	Tarbase
hsa-miR-195-5p	DUSP10	Microarrays	Tarbase
hsa-miR-195-5p	GATAD2B	HITS-CLIP	Tarbase
hsa-miR-195-5p	KDM6A	HITS-CLIP	Tarbase
hsa-miR-195-5p	OGT	HITS-CLIP	Tarbase
hsa-miR-195-5p	OGT	HITS-CLIP	Tarbase
hsa-miR-195-5p	TAF5	Microarrays	Tarbase
hsa-miR-195-5p	CSRP2BP	HITS-CLIP	Tarbase
hsa-miR-195-5p	MBIP	HITS-CLIP	Tarbase
hsa-miR-195-5p	CENPH	Microarrays	Tarbase
hsa-miR-195-5p	CXXC1	HITS-CLIP	Tarbase
hsa-miR-195-5p	BUB1B	Microarrays	Tarbase
hsa-miR-195-5p	HIST1H2BD	Microarrays	Tarbase
hsa-miR-195-5p	MIS18A	Microarrays	Tarbase
hsa-miR-195-5p	MYSM1	HITS-CLIP	Tarbase
hsa-miR-195-5p	GABRG1	Microarrays	Tarbase
hsa-miR-195-5p	GABRB1	Microarrays	Tarbase
hsa-miR-195-5p	PPP4R2	HITS-CLIP	Tarbase
hsa-miR-195-5p	DTX3L	Microarrays	Tarbase
hsa-miR-195-5p	RNF168	PAR-CLIP	Tarbase
hsa-miR-195-5p	H2AFZ	Microarrays	Tarbase
hsa-miR-195-5p	WDR82	HITS-CLIP	Tarbase
hsa-miR-195-5p	WDR82	HITS-CLIP	Tarbase
hsa-miR-195-5p	HEATR2	HITS-CLIP	Tarbase
hsa-miR-195-5p	CDK5	Microarrays	Tarbase
hsa-miR-195-5p	UBAP1	HITS-CLIP	Tarbase
hsa-miR-195-5p	PTCHD1	Microarrays	Tarbase
hsa-miR-195-5p	NSD1	PAR-CLIP	Tarbase
hsa-miR-195-5p	NSD1	HITS-CLIP	Tarbase
hsa-miR-195-5p	NSD1	HITS-CLIP	Tarbase
hsa-miR-195-5p	CENPN	HITS-CLIP	Tarbase
hsa-miR-195-5p	CENPN	Microarrays	Tarbase
hsa-miR-195-5p	GATAD2A	HITS-CLIP	Tarbase
hsa-miR-195-5p	TUBA1A	HITS-CLIP	Tarbase
hsa-miR-195-5p	TUBA1A	AGO-IP	Tarbase
hsa-miR-195-5p	DDB1	HITS-CLIP	Tarbase
hsa-miR-195-5p	DDB1	HITS-CLIP	Tarbase
hsa-miR-195-5p	DDB1	HITS-CLIP	Tarbase
hsa-miR-195-5p	PBK	Microarrays	Tarbase
hsa-miR-195-5p	SETD5	HITS-CLIP	Tarbase
hsa-miR-195-5p	HSPBAP1	HITS-CLIP	Tarbase
hsa-miR-195-5p	BUB1	Microarrays	Tarbase
hsa-miR-195-5p	CHD7	HITS-CLIP	Tarbase
hsa-miR-195-5p	ASXL1	PAR-CLIP	Tarbase
hsa-miR-195-5p	CAMTA1	HITS-CLIP	Tarbase
hsa-miR-195-5p	JMJD1C	HITS-CLIP	Tarbase
hsa-miR-195-5p	CHD2	HITS-CLIP	Tarbase
hsa-miR-195-5p	PPP2R2D	Microarrays	Tarbase
hsa-miR-195-5p	FOSL1	Microarrays	Tarbase
hsa-miR-195-5p	BNIP3	Microarrays	Tarbase
hsa-miR-195-5p	CDK5R1	HITS-CLIP	Tarbase
hsa-miR-195-5p	CDK5R1	HITS-CLIP	Tarbase
hsa-miR-195-5p	RPS6KA3	HITS-CLIP	Tarbase
hsa-miR-195-5p	RPS6KA3	HITS-CLIP	Tarbase
hsa-miR-195-5p	RPS6KA3	HITS-CLIP	Tarbase
hsa-miR-195-5p	CHD9	HITS-CLIP	Tarbase
hsa-miR-195-5p	GSG2	Microarrays	Tarbase
hsa-miR-195-5p	TAF7	HITS-CLIP	Tarbase
hsa-miR-195-5p	HIST1H2AC	Microarrays	Tarbase
hsa-miR-195-5p	EHMT1	HITS-CLIP	Tarbase
hsa-miR-195-5p	NPM1	HITS-CLIP	Tarbase
hsa-miR-195-5p	NPM1	HITS-CLIP	Tarbase
hsa-miR-195-5p	SETD3	Microarrays	Tarbase
hsa-miR-195-5p	HIST2H2AC	Microarrays	Tarbase
hsa-miR-195-5p	HIST2H2AB	Microarrays	Tarbase
hsa-miR-195-5p	HIST2H2BE	Microarrays	Tarbase
hsa-miR-195-5p	PPP1CC	HITS-CLIP	Tarbase
hsa-miR-195-5p	PPP1CC	HITS-CLIP	Tarbase
hsa-miR-195-5p	PPP1CC	HITS-CLIP	Tarbase
hsa-miR-195-5p	ERCC6L	Microarrays	Tarbase
hsa-miR-195-5p	H2AFX	Microarrays	Tarbase
hsa-miR-195-5p	SRSF10	HITS-CLIP	Tarbase
hsa-miR-195-5p	TRRAP	PAR-CLIP	Tarbase
hsa-miR-195-5p	TRRAP	PAR-CLIP	Tarbase
hsa-miR-195-5p	HIST3H2BB	Microarrays	Tarbase
hsa-miR-195-5p	HIST1H4C	HITS-CLIP	Tarbase
hsa-miR-195-5p	ADARB1	Microarrays	Tarbase
hsa-miR-195-5p	TLK1	PAR-CLIP	Tarbase
hsa-miR-195-5p	TLK1	HITS-CLIP	Tarbase
hsa-miR-195-5p	TLK1	HITS-CLIP	Tarbase
hsa-miR-195-5p	TOP1	HITS-CLIP	Tarbase
hsa-miR-195-5p	ANKRD28	HITS-CLIP	Tarbase
hsa-miR-195-5p	CHUK	qPCR	Tarbase
hsa-miR-195-5p	CHUK	Western Blot	Tarbase
hsa-miR-195-5p	CHUK	HITS-CLIP	Tarbase
hsa-miR-195-5p	CHUK	Microarrays	Tarbase
hsa-miR-195-5p	CHCHD10	Microarrays	Tarbase
hsa-miR-195-5p	ATXN7L3B	HITS-CLIP	Tarbase
hsa-miR-195-5p	ATXN7L3B	Microarrays	Tarbase
hsa-miR-195-5p	PRKDC	HITS-CLIP	Tarbase
hsa-miR-195-5p	PRKDC	HITS-CLIP	Tarbase
hsa-miR-195-5p	HIST2H4A	Microarrays	Tarbase
hsa-miR-195-5p	HIST1H2BG	HITS-CLIP	Tarbase
hsa-miR-195-5p	HIST1H3G	Microarrays	Tarbase
hsa-miR-195-5p	HIST1H3B	Microarrays	Tarbase
hsa-miR-195-5p	HIST1H2BE	HITS-CLIP	Tarbase
hsa-miR-195-5p	HIST1H2BO	Microarrays	Tarbase
hsa-miR-195-5p	HIST1H2AH	HITS-CLIP	Tarbase
hsa-miR-195-5p	HIST1H2AH	HITS-CLIP	Tarbase
hsa-miR-195-5p	HIST1H2AH	HITS-CLIP	Tarbase
hsa-miR-195-5p	HIST1H2AH	Microarrays	Tarbase
hsa-miR-195-5p	MLLT6	HITS-CLIP	Tarbase
hsa-miR-195-5p	SMEK2	HITS-CLIP	Tarbase
hsa-miR-195-5p	HIST1H4L	Microarrays	Tarbase
hsa-miR-195-5p	HIST1H2AK	Microarrays	Tarbase
hsa-miR-195-5p	HIST1H2BH	HITS-CLIP	Tarbase
hsa-miR-195-5p	HIST1H2BH	Microarrays	Tarbase
hsa-miR-195-5p	HIST1H2AJ	HITS-CLIP	Tarbase
hsa-miR-195-5p	HIST1H2AJ	HITS-CLIP	Tarbase
hsa-miR-195-5p	HIST1H2AJ	HITS-CLIP	Tarbase
hsa-miR-195-5p	HIST1H2AJ	Microarrays	Tarbase
hsa-miR-195-5p	HIST1H4D	Microarrays	Tarbase
hsa-miR-195-5p	HIST1H2BF	Microarrays	Tarbase
hsa-miR-195-5p	HIST1H3F	Microarrays	Tarbase
hsa-miR-195-5p	HIST1H3C	HITS-CLIP	Tarbase
hsa-miR-195-5p	HIST1H2AB	Microarrays	Tarbase
hsa-miR-195-5p	HIST1H2BI	Microarrays	Tarbase
hsa-miR-195-5p	HIST1H4A	Microarrays	Tarbase
hsa-miR-195-5p	HIST1H2AM	Microarrays	Tarbase
hsa-miR-195-3p	MYC	PAR-CLIP	miRTarbase
hsa-miR-195-3p	PRKAA1	PAR-CLIP	miRTarbase
hsa-miR-195-3p	PRKAA1	PAR-CLIP//HITS-CLIP	miRTarbase
hsa-miR-195-3p	PRKAA1	PAR-CLIP	miRTarbase
hsa-miR-195-3p	PRKAA1	PAR-CLIP	miRTarbase
hsa-miR-195-3p	RPS6KA5	PAR-CLIP	miRTarbase
hsa-miR-15a-5p	MYB	Luciferase reporter assay//Western blot	miRTarbase
hsa-miR-15a-5p	MYB	Luciferase reporter assay//Microarray//qRT-PCR	miRTarbase
hsa-miR-15a-5p	H3F3B	Microarray	miRTarbase
hsa-miR-15a-5p	CHUK	Luciferase reporter assay//qRT-PCR//Western blot	miRTarbase
hsa-miR-15a-5p	HMGA1	Luciferase reporter assay//qRT-PCR//Western blot	miRTarbase
hsa-miR-15a-5p	HMGA1	HITS-CLIP	miRTarbase
hsa-miR-15a-5p	HIST1H2BK	CLASH	miRTarbase
hsa-miR-15a-5p	ASNSD1	CLASH	miRTarbase
hsa-miR-15a-5p	CHD4	CLASH	miRTarbase
hsa-miR-15a-5p	TRIM28	CLASH	miRTarbase
hsa-miR-15a-5p	MYBL1	CLASH	miRTarbase
hsa-miR-15a-5p	CARM1	Luciferase reporter assay//qRT-PCR//Western blot	miRTarbase
hsa-miR-15a-5p	OGT	PAR-CLIP	miRTarbase
hsa-miR-15a-5p	OGT	PAR-CLIP	miRTarbase
hsa-miR-15a-5p	OGT	HITS-CLIP	miRTarbase
hsa-miR-15a-5p	OGT	PAR-CLIP	miRTarbase
hsa-miR-15a-5p	PAK2	PAR-CLIP	miRTarbase
hsa-miR-15a-5p	EZH1	HITS-CLIP	miRTarbase
hsa-miR-15a-5p	TET3	HITS-CLIP	miRTarbase
hsa-miR-15a-5p	ATXN7L3B	PAR-CLIP	miRTarbase
hsa-miR-15a-5p	ATXN7L3B	PAR-CLIP	miRTarbase
hsa-miR-15a-5p	TBRG1	PAR-CLIP	miRTarbase
hsa-miR-15a-5p	CHEK1	HITS-CLIP	miRTarbase
hsa-miR-15a-5p	CHEK1	HITS-CLIP	miRTarbase
hsa-miR-15a-5p	SIRT4	HITS-CLIP	miRTarbase
hsa-miR-15a-5p	SETD1B	PAR-CLIP	miRTarbase
hsa-miR-15a-5p	PPP2R5C	PAR-CLIP	miRTarbase
hsa-miR-15a-5p	PPP2R5C	PAR-CLIP	miRTarbase
hsa-miR-15a-5p	MLLT6	HITS-CLIP	miRTarbase
hsa-miR-15a-5p	RNF168	PAR-CLIP	miRTarbase
hsa-miR-15a-5p	SRSF1	PAR-CLIP	miRTarbase
hsa-miR-15a-5p	SRSF1	PAR-CLIP	miRTarbase
hsa-miR-15a-5p	SRSF1	PAR-CLIP	miRTarbase
hsa-miR-15a-5p	CBX4	PAR-CLIP	miRTarbase
hsa-miR-15a-5p	CBX4	HITS-CLIP	miRTarbase
hsa-miR-15a-5p	BAZ2A	PAR-CLIP	miRTarbase
hsa-miR-15a-5p	SALL1	PAR-CLIP	miRTarbase
hsa-miR-15a-5p	SALL1	PAR-CLIP	miRTarbase
hsa-miR-15a-5p	MBD4	PAR-CLIP	miRTarbase
hsa-miR-15a-5p	CDK17	PAR-CLIP	miRTarbase
hsa-miR-15a-5p	CDK17	HITS-CLIP	miRTarbase
hsa-miR-15a-5p	ASH1L	PAR-CLIP	miRTarbase
hsa-miR-15a-5p	ASH1L	HITS-CLIP	miRTarbase
hsa-miR-15a-5p	TAF13	PAR-CLIP	miRTarbase
hsa-miR-15a-5p	TAF13	PAR-CLIP	miRTarbase
hsa-miR-15a-5p	PRKAA1	PAR-CLIP	miRTarbase
hsa-miR-15a-5p	PRKAA1	PAR-CLIP	miRTarbase
hsa-miR-15a-5p	HIST2H2BE	PAR-CLIP	miRTarbase
hsa-miR-15a-5p	TLK1	PAR-CLIP	miRTarbase
hsa-miR-15a-5p	TLK1	HITS-CLIP	miRTarbase
hsa-miR-15a-5p	UBE2H	PAR-CLIP	miRTarbase
hsa-miR-15a-5p	USP3	HITS-CLIP	miRTarbase
hsa-miR-15a-5p	USP31	HITS-CLIP	miRTarbase
hsa-miR-15a-5p	RPS6KA3	HITS-CLIP	miRTarbase
hsa-miR-15a-5p	PPP6C	HITS-CLIP	miRTarbase
hsa-miR-15a-5p	GSK3B	HITS-CLIP	miRTarbase
hsa-miR-15a-5p	CDKN2AIPNL	HITS-CLIP	miRTarbase
hsa-miR-15a-5p	ASXL1	HITS-CLIP	miRTarbase
hsa-miR-15a-5p	CREBBP	HITS-CLIP	Tarbase
hsa-miR-15a-5p	TNFRSF12A	HITS-CLIP	Tarbase
hsa-miR-15a-5p	MATR3	HITS-CLIP	Tarbase
hsa-miR-15a-5p	MATR3	HITS-CLIP	Tarbase
hsa-miR-15a-5p	MATR3	HITS-CLIP	Tarbase
hsa-miR-15a-5p	MATR3	HITS-CLIP	Tarbase
hsa-miR-15a-5p	MATR3	Chimeric fragments	Tarbase
hsa-miR-15a-5p	CDK17	PAR-CLIP	Tarbase
hsa-miR-15a-5p	CDK17	PAR-CLIP	Tarbase
hsa-miR-15a-5p	CDK17	HITS-CLIP	Tarbase
hsa-miR-15a-5p	UHRF1BP1	PAR-CLIP	Tarbase
hsa-miR-15a-5p	UHRF1BP1	PAR-CLIP	Tarbase
hsa-miR-15a-5p	HEATR6	HITS-CLIP	Tarbase
hsa-miR-15a-5p	MBD3	HITS-CLIP	Tarbase
hsa-miR-15a-5p	SMARCE1	HITS-CLIP	Tarbase
hsa-miR-15a-5p	FOSL2	HITS-CLIP	Tarbase
hsa-miR-15a-5p	FOSL2	HITS-CLIP	Tarbase
hsa-miR-15a-5p	FOSL2	PAR-CLIP	Tarbase
hsa-miR-15a-5p	FOSL2	HITS-CLIP	Tarbase
hsa-miR-15a-5p	FOSL2	HITS-CLIP	Tarbase
hsa-miR-15a-5p	FOSL2	HITS-CLIP	Tarbase
hsa-miR-15a-5p	BAZ2A	HITS-CLIP	Tarbase
hsa-miR-15a-5p	BAZ2A	HITS-CLIP	Tarbase
hsa-miR-15a-5p	PPP2R5C	HITS-CLIP	Tarbase
hsa-miR-15a-5p	PPP2R5C	PAR-CLIP	Tarbase
hsa-miR-15a-5p	SRCAP	HITS-CLIP	Tarbase
hsa-miR-15a-5p	SRCAP	HITS-CLIP	Tarbase
hsa-miR-15a-5p	SRCAP	HITS-CLIP	Tarbase
hsa-miR-15a-5p	HUWE1	HITS-CLIP	Tarbase
hsa-miR-15a-5p	HUWE1	HITS-CLIP	Tarbase
hsa-miR-15a-5p	ATXN7L3	PAR-CLIP	Tarbase
hsa-miR-15a-5p	ATXN7L3	HITS-CLIP	Tarbase
hsa-miR-15a-5p	ATXN7L3	PAR-CLIP	Tarbase
hsa-miR-15a-5p	ATXN7L3	PAR-CLIP	Tarbase
hsa-miR-15a-5p	ATXN7L3	HITS-CLIP	Tarbase
hsa-miR-15a-5p	BTAF1	HITS-CLIP	Tarbase
hsa-miR-15a-5p	BTAF1	HITS-CLIP	Tarbase
hsa-miR-15a-5p	BTAF1	HITS-CLIP	Tarbase
hsa-miR-15a-5p	BTAF1	HITS-CLIP	Tarbase
hsa-miR-15a-5p	BTAF1	HITS-CLIP	Tarbase
hsa-miR-15a-5p	BTAF1	Chimeric fragments	Tarbase
hsa-miR-15a-5p	BRPF3	HITS-CLIP	Tarbase
hsa-miR-15a-5p	RBX1	PAR-CLIP	Tarbase
hsa-miR-15a-5p	EP300	HITS-CLIP	Tarbase
hsa-miR-15a-5p	EP300	HITS-CLIP	Tarbase
hsa-miR-15a-5p	RPS6KA5	HITS-CLIP	Tarbase
hsa-miR-15a-5p	SMEK1	HITS-CLIP	Tarbase
hsa-miR-15a-5p	SMEK1	PAR-CLIP	Tarbase
hsa-miR-15a-5p	SMEK1	Chimeric fragments	Tarbase
hsa-miR-15a-5p	CHD8	HITS-CLIP	Tarbase
hsa-miR-15a-5p	STK4	HITS-CLIP	Tarbase
hsa-miR-15a-5p	CDK5RAP1	HITS-CLIP	Tarbase
hsa-miR-15a-5p	SMARCA1	PAR-CLIP	Tarbase
hsa-miR-15a-5p	SMARCA1	PAR-CLIP	Tarbase
hsa-miR-15a-5p	USP31	PAR-CLIP	Tarbase
hsa-miR-15a-5p	USP31	PAR-CLIP	Tarbase
hsa-miR-15a-5p	USP31	Chimeric fragments	Tarbase
hsa-miR-15a-5p	SALL1	HITS-CLIP	Tarbase
hsa-miR-15a-5p	SALL1	HITS-CLIP	Tarbase
hsa-miR-15a-5p	SALL1	HITS-CLIP	Tarbase
hsa-miR-15a-5p	SALL1	PAR-CLIP	Tarbase
hsa-miR-15a-5p	SALL1	Chimeric fragments	Tarbase
hsa-miR-15a-5p	PPP2CB	HITS-CLIP	Tarbase
hsa-miR-15a-5p	PPP2R1A	HITS-CLIP	Tarbase
hsa-miR-15a-5p	H2AFV	HITS-CLIP	Tarbase
hsa-miR-15a-5p	CAMTA2	HITS-CLIP	Tarbase
hsa-miR-15a-5p	EZH1	HITS-CLIP	Tarbase
hsa-miR-15a-5p	SUV420H1	HITS-CLIP	Tarbase
hsa-miR-15a-5p	CHD4	HITS-CLIP	Tarbase
hsa-miR-15a-5p	CHD4	HITS-CLIP	Tarbase
hsa-miR-15a-5p	CHD4	HITS-CLIP	Tarbase
hsa-miR-15a-5p	PPP2CA	HITS-CLIP	Tarbase
hsa-miR-15a-5p	PPP2CA	HITS-CLIP	Tarbase
hsa-miR-15a-5p	NR3C1	HITS-CLIP	Tarbase
hsa-miR-15a-5p	HDAC1	Chimeric fragments	Tarbase
hsa-miR-15a-5p	ASH1L	PAR-CLIP	Tarbase
hsa-miR-15a-5p	ASH1L	PAR-CLIP	Tarbase
hsa-miR-15a-5p	ASH1L	HITS-CLIP	Tarbase
hsa-miR-15a-5p	ASH1L	PAR-CLIP	Tarbase
hsa-miR-15a-5p	ASH1L	HITS-CLIP	Tarbase
hsa-miR-15a-5p	ASH1L	HITS-CLIP	Tarbase
hsa-miR-15a-5p	ASH1L	PAR-CLIP	Tarbase
hsa-miR-15a-5p	ASH1L	HITS-CLIP	Tarbase
hsa-miR-15a-5p	ASH1L	PAR-CLIP	Tarbase
hsa-miR-15a-5p	ARID1A	HITS-CLIP	Tarbase
hsa-miR-15a-5p	MYB	HITS-CLIP	Tarbase
hsa-miR-15a-5p	MYB	HITS-CLIP	Tarbase
hsa-miR-15a-5p	HEATR1	PAR-CLIP	Tarbase
hsa-miR-15a-5p	PPP2R4	PAR-CLIP	Tarbase
hsa-miR-15a-5p	PPP6C	PAR-CLIP	Tarbase
hsa-miR-15a-5p	HELLS	HITS-CLIP	Tarbase
hsa-miR-15a-5p	EPC1	PAR-CLIP	Tarbase
hsa-miR-15a-5p	EPC1	HITS-CLIP	Tarbase
hsa-miR-15a-5p	EPC1	PAR-CLIP	Tarbase
hsa-miR-15a-5p	TNFRSF10B	HITS-CLIP	Tarbase
hsa-miR-15a-5p	CBX3	HITS-CLIP	Tarbase
hsa-miR-15a-5p	CBX3	HITS-CLIP	Tarbase
hsa-miR-15a-5p	CHD6	HITS-CLIP	Tarbase
hsa-miR-15a-5p	USP22	HITS-CLIP	Tarbase
hsa-miR-15a-5p	GTF3C4	HITS-CLIP	Tarbase
hsa-miR-15a-5p	HEATR5A	HITS-CLIP	Tarbase
hsa-miR-15a-5p	FOXA1	HITS-CLIP	Tarbase
hsa-miR-15a-5p	MLLT4	HITS-CLIP	Tarbase
hsa-miR-15a-5p	PRKAB2	HITS-CLIP	Tarbase
hsa-miR-15a-5p	PRKAB2	HITS-CLIP	Tarbase
hsa-miR-15a-5p	GRSF1	HITS-CLIP	Tarbase
hsa-miR-15a-5p	GRSF1	HITS-CLIP	Tarbase
hsa-miR-15a-5p	SMYD5	HITS-CLIP	Tarbase
hsa-miR-15a-5p	TAF5L	HITS-CLIP	Tarbase
hsa-miR-15a-5p	SRSF1	Chimeric fragments	Tarbase
hsa-miR-15a-5p	HMGA1	HITS-CLIP	Tarbase
hsa-miR-15a-5p	HMGA1	HITS-CLIP	Tarbase
hsa-miR-15a-5p	HMGA1	PAR-CLIP	Tarbase
hsa-miR-15a-5p	HMGA1	HITS-CLIP	Tarbase
hsa-miR-15a-5p	HMGA1	HITS-CLIP	Tarbase
hsa-miR-15a-5p	HMGA1	Luciferase Reporter Assay	Tarbase
hsa-miR-15a-5p	PPP2R1B	HITS-CLIP	Tarbase
hsa-miR-15a-5p	PPP2R1B	HITS-CLIP	Tarbase
hsa-miR-15a-5p	PPP2R1B	HITS-CLIP	Tarbase
hsa-miR-15a-5p	PPP2R1B	HITS-CLIP	Tarbase
hsa-miR-15a-5p	BARD1	HITS-CLIP	Tarbase
hsa-miR-15a-5p	ASNSD1	HITS-CLIP	Tarbase
hsa-miR-15a-5p	ASNSD1	HITS-CLIP	Tarbase
hsa-miR-15a-5p	ASNSD1	Chimeric fragments	Tarbase
hsa-miR-15a-5p	PARP16	PAR-CLIP	Tarbase
hsa-miR-15a-5p	PARP16	HITS-CLIP	Tarbase
hsa-miR-15a-5p	PARP16	HITS-CLIP	Tarbase
hsa-miR-15a-5p	PARP16	PAR-CLIP	Tarbase
hsa-miR-15a-5p	PARP16	HITS-CLIP	Tarbase
hsa-miR-15a-5p	ZCRB1	HITS-CLIP	Tarbase
hsa-miR-15a-5p	SMARCC2	PAR-CLIP	Tarbase
hsa-miR-15a-5p	KANSL2	HITS-CLIP	Tarbase
hsa-miR-15a-5p	ANKRD52	HITS-CLIP	Tarbase
hsa-miR-15a-5p	ANKRD52	HITS-CLIP	Tarbase
hsa-miR-15a-5p	ANKRD52	HITS-CLIP	Tarbase
hsa-miR-15a-5p	ANKRD52	PAR-CLIP	Tarbase
hsa-miR-15a-5p	SETD1B	PAR-CLIP	Tarbase
hsa-miR-15a-5p	SETD1B	HITS-CLIP	Tarbase
hsa-miR-15a-5p	SETD1B	HITS-CLIP	Tarbase
hsa-miR-15a-5p	NCOA2	HITS-CLIP	Tarbase
hsa-miR-15a-5p	CBX4	HITS-CLIP	Tarbase
hsa-miR-15a-5p	CBX4	HITS-CLIP	Tarbase
hsa-miR-15a-5p	CBX4	PAR-CLIP	Tarbase
hsa-miR-15a-5p	CBX4	HITS-CLIP	Tarbase
hsa-miR-15a-5p	CBX4	HITS-CLIP	Tarbase
hsa-miR-15a-5p	CBX4	HITS-CLIP	Tarbase
hsa-miR-15a-5p	SAE1	HITS-CLIP	Tarbase
hsa-miR-15a-5p	GATAD2B	HITS-CLIP	Tarbase
hsa-miR-15a-5p	GATAD2B	HITS-CLIP	Tarbase
hsa-miR-15a-5p	KDM6A	PAR-CLIP	Tarbase
hsa-miR-15a-5p	KDM6A	HITS-CLIP	Tarbase
hsa-miR-15a-5p	OGT	PAR-CLIP	Tarbase
hsa-miR-15a-5p	OGT	HITS-CLIP	Tarbase
hsa-miR-15a-5p	OGT	HITS-CLIP	Tarbase
hsa-miR-15a-5p	OGT	HITS-CLIP	Tarbase
hsa-miR-15a-5p	OGT	Chimeric fragments	Tarbase
hsa-miR-15a-5p	CSRP2BP	HITS-CLIP	Tarbase
hsa-miR-15a-5p	CHEK1	PAR-CLIP	Tarbase
hsa-miR-15a-5p	PPP4C	Chimeric fragments	Tarbase
hsa-miR-15a-5p	MBIP	HITS-CLIP	Tarbase
hsa-miR-15a-5p	SMARCA5	PAR-CLIP	Tarbase
hsa-miR-15a-5p	INO80C	Chimeric fragments	Tarbase
hsa-miR-15a-5p	CXXC1	HITS-CLIP	Tarbase
hsa-miR-15a-5p	KLF10	Chimeric fragments	Tarbase
hsa-miR-15a-5p	HIST1H2BD	PAR-CLIP	Tarbase
hsa-miR-15a-5p	MYSM1	HITS-CLIP	Tarbase
hsa-miR-15a-5p	PPP4R2	PAR-CLIP	Tarbase
hsa-miR-15a-5p	PPP4R2	HITS-CLIP	Tarbase
hsa-miR-15a-5p	ATXN7	HITS-CLIP	Tarbase
hsa-miR-15a-5p	RNF168	PAR-CLIP	Tarbase
hsa-miR-15a-5p	RNF168	Chimeric fragments	Tarbase
hsa-miR-15a-5p	WDR82	HITS-CLIP	Tarbase
hsa-miR-15a-5p	WDR82	PAR-CLIP	Tarbase
hsa-miR-15a-5p	WDR82	HITS-CLIP	Tarbase
hsa-miR-15a-5p	NIPBL	PAR-CLIP	Tarbase
hsa-miR-15a-5p	HEATR2	HITS-CLIP	Tarbase
hsa-miR-15a-5p	UBAP1	HITS-CLIP	Tarbase
hsa-miR-15a-5p	UBAP1	PAR-CLIP	Tarbase
hsa-miR-15a-5p	NSD1	PAR-CLIP	Tarbase
hsa-miR-15a-5p	NSD1	HITS-CLIP	Tarbase
hsa-miR-15a-5p	NSD1	PAR-CLIP	Tarbase
hsa-miR-15a-5p	NSD1	HITS-CLIP	Tarbase
hsa-miR-15a-5p	NSD1	HITS-CLIP	Tarbase
hsa-miR-15a-5p	CENPN	HITS-CLIP	Tarbase
hsa-miR-15a-5p	GATAD2A	HITS-CLIP	Tarbase
hsa-miR-15a-5p	GATAD2A	Chimeric fragments	Tarbase
hsa-miR-15a-5p	TUBA1A	HITS-CLIP	Tarbase
hsa-miR-15a-5p	DDB1	HITS-CLIP	Tarbase
hsa-miR-15a-5p	DDB1	HITS-CLIP	Tarbase
hsa-miR-15a-5p	DDB1	HITS-CLIP	Tarbase
hsa-miR-15a-5p	SETD5	PAR-CLIP	Tarbase
hsa-miR-15a-5p	SETD5	HITS-CLIP	Tarbase
hsa-miR-15a-5p	CDKN2AIP	PAR-CLIP	Tarbase
hsa-miR-15a-5p	HSPBAP1	HITS-CLIP	Tarbase
hsa-miR-15a-5p	CHD3	PAR-CLIP	Tarbase
hsa-miR-15a-5p	CHD3	PAR-CLIP	Tarbase
hsa-miR-15a-5p	CHD3	HITS-CLIP	Tarbase
hsa-miR-15a-5p	USP38	PAR-CLIP	Tarbase
hsa-miR-15a-5p	USP38	Chimeric fragments	Tarbase
hsa-miR-15a-5p	PPM1D	PAR-CLIP	Tarbase
hsa-miR-15a-5p	PPM1D	PAR-CLIP	Tarbase
hsa-miR-15a-5p	CHD7	PAR-CLIP	Tarbase
hsa-miR-15a-5p	CHD7	HITS-CLIP	Tarbase
hsa-miR-15a-5p	ASXL1	PAR-CLIP	Tarbase
hsa-miR-15a-5p	ASXL1	PAR-CLIP	Tarbase
hsa-miR-15a-5p	ASXL1	Chimeric fragments	Tarbase
hsa-miR-15a-5p	JMJD1C	HITS-CLIP	Tarbase
hsa-miR-15a-5p	PPP1CA	HITS-CLIP	Tarbase
hsa-miR-15a-5p	CHD2	HITS-CLIP	Tarbase
hsa-miR-15a-5p	CDK5R1	PAR-CLIP	Tarbase
hsa-miR-15a-5p	CDK5R1	HITS-CLIP	Tarbase
hsa-miR-15a-5p	CDK5R1	HITS-CLIP	Tarbase
hsa-miR-15a-5p	RPS6KA3	HITS-CLIP	Tarbase
hsa-miR-15a-5p	RPS6KA3	HITS-CLIP	Tarbase
hsa-miR-15a-5p	RPS6KA3	PAR-CLIP	Tarbase
hsa-miR-15a-5p	RPS6KA3	HITS-CLIP	Tarbase
hsa-miR-15a-5p	RPS6KA3	HITS-CLIP	Tarbase
hsa-miR-15a-5p	RPS6KA3	HITS-CLIP	Tarbase
hsa-miR-15a-5p	CHD9	HITS-CLIP	Tarbase
hsa-miR-15a-5p	CHD9	PAR-CLIP	Tarbase
hsa-miR-15a-5p	TAF7	HITS-CLIP	Tarbase
hsa-miR-15a-5p	TAF7	Chimeric fragments	Tarbase
hsa-miR-15a-5p	PAK2	PAR-CLIP	Tarbase
hsa-miR-15a-5p	EHMT1	HITS-CLIP	Tarbase
hsa-miR-15a-5p	NPM1	HITS-CLIP	Tarbase
hsa-miR-15a-5p	NPM1	HITS-CLIP	Tarbase
hsa-miR-15a-5p	NPM1	PAR-CLIP	Tarbase
hsa-miR-15a-5p	HIST3H2A	PAR-CLIP	Tarbase
hsa-miR-15a-5p	PRKAG1	PAR-CLIP	Tarbase
hsa-miR-15a-5p	PRKAG1	HITS-CLIP	Tarbase
hsa-miR-15a-5p	SETD3	Chimeric fragments	Tarbase
hsa-miR-15a-5p	MYBL1	PAR-CLIP	Tarbase
hsa-miR-15a-5p	PPP1CC	HITS-CLIP	Tarbase
hsa-miR-15a-5p	PPP1CC	HITS-CLIP	Tarbase
hsa-miR-15a-5p	TAF9B	HITS-CLIP	Tarbase
hsa-miR-15a-5p	H2AFX	HITS-CLIP	Tarbase
hsa-miR-15a-5p	TRRAP	PAR-CLIP	Tarbase
hsa-miR-15a-5p	TRRAP	PAR-CLIP	Tarbase
hsa-miR-15a-5p	TRRAP	PAR-CLIP	Tarbase
hsa-miR-15a-5p	TRRAP	PAR-CLIP	Tarbase
hsa-miR-15a-5p	TRRAP	PAR-CLIP	Tarbase
hsa-miR-15a-5p	TRRAP	Chimeric fragments	Tarbase
hsa-miR-15a-5p	HIST1H4C	HITS-CLIP	Tarbase
hsa-miR-15a-5p	HIST1H3D	HITS-CLIP	Tarbase
hsa-miR-15a-5p	TLK1	PAR-CLIP	Tarbase
hsa-miR-15a-5p	TLK1	PAR-CLIP	Tarbase
hsa-miR-15a-5p	TLK1	PAR-CLIP	Tarbase
hsa-miR-15a-5p	TLK1	HITS-CLIP	Tarbase
hsa-miR-15a-5p	TLK1	PAR-CLIP	Tarbase
hsa-miR-15a-5p	TLK1	HITS-CLIP	Tarbase
hsa-miR-15a-5p	TOP1	HITS-CLIP	Tarbase
hsa-miR-15a-5p	ANKRD28	HITS-CLIP	Tarbase
hsa-miR-15a-5p	CHUK	Luciferase Reporter Assay	Tarbase
hsa-miR-15a-5p	CHUK	PAR-CLIP	Tarbase
hsa-miR-15a-5p	CHUK	qPCR	Tarbase
hsa-miR-15a-5p	CHUK	Western Blot	Tarbase
hsa-miR-15a-5p	CHUK	PAR-CLIP	Tarbase
hsa-miR-15a-5p	CHUK	HITS-CLIP	Tarbase
hsa-miR-15a-5p	CHUK	HITS-CLIP	Tarbase
hsa-miR-15a-5p	CHUK	Luciferase Reporter Assay	Tarbase
hsa-miR-15a-5p	ERCC6	Chimeric fragments	Tarbase
hsa-miR-15a-5p	H2AFJ	HITS-CLIP	Tarbase
hsa-miR-15a-5p	ATXN7L3B	PAR-CLIP	Tarbase
hsa-miR-15a-5p	ATXN7L3B	HITS-CLIP	Tarbase
hsa-miR-15a-5p	ATXN7L3B	HITS-CLIP	Tarbase
hsa-miR-15a-5p	ATXN7L3B	HITS-CLIP	Tarbase
hsa-miR-15a-5p	PRKDC	HITS-CLIP	Tarbase
hsa-miR-15a-5p	PRKDC	HITS-CLIP	Tarbase
hsa-miR-15a-5p	PRKDC	HITS-CLIP	Tarbase
hsa-miR-15a-5p	HIST1H2BG	PAR-CLIP	Tarbase
hsa-miR-15a-5p	HIST1H2BG	HITS-CLIP	Tarbase
hsa-miR-15a-5p	HIST1H3G	HITS-CLIP	Tarbase
hsa-miR-15a-5p	HIST1H3B	PAR-CLIP	Tarbase
hsa-miR-15a-5p	HIST1H2BE	HITS-CLIP	Tarbase
hsa-miR-15a-5p	HIST1H2BO	PAR-CLIP	Tarbase
hsa-miR-15a-5p	HIST1H2AH	HITS-CLIP	Tarbase
hsa-miR-15a-5p	HIST1H2AH	HITS-CLIP	Tarbase
hsa-miR-15a-5p	HIST1H2AH	PAR-CLIP	Tarbase
hsa-miR-15a-5p	HIST1H2AH	HITS-CLIP	Tarbase
hsa-miR-15a-5p	MLLT6	HITS-CLIP	Tarbase
hsa-miR-15a-5p	SMEK2	HITS-CLIP	Tarbase
hsa-miR-15a-5p	SMEK2	PAR-CLIP	Tarbase
hsa-miR-15a-5p	HIST1H2BH	HITS-CLIP	Tarbase
hsa-miR-15a-5p	HIST1H2AJ	HITS-CLIP	Tarbase
hsa-miR-15a-5p	HIST1H2AJ	HITS-CLIP	Tarbase
hsa-miR-15a-5p	HIST1H2AJ	HITS-CLIP	Tarbase
hsa-miR-15a-5p	HIST1H2AJ	HITS-CLIP	Tarbase
hsa-miR-15a-5p	HIST1H2BF	HITS-CLIP	Tarbase
hsa-miR-15a-5p	HIST1H3C	HITS-CLIP	Tarbase
hsa-miR-15a-5p	HIST1H2AB	PAR-CLIP	Tarbase
hsa-miR-15a-3p	PRMT3	PAR-CLIP	miRTarbase
hsa-miR-15a-3p	TNFRSF10D	PAR-CLIP	miRTarbase
hsa-miR-15a-3p	TAF1D	PAR-CLIP	miRTarbase
hsa-miR-15a-3p	BAZ1B	HITS-CLIP	Tarbase
hsa-miR-15a-3p	MBD3	HITS-CLIP	Tarbase
hsa-miR-15a-3p	MBD3	HITS-CLIP	Tarbase
hsa-miR-15a-3p	CYBRD1	HITS-CLIP	Tarbase
hsa-miR-15a-3p	RAD54L	HITS-CLIP	Tarbase
hsa-miR-15a-3p	HUWE1	HITS-CLIP	Tarbase
hsa-miR-15a-3p	RBBP7	HITS-CLIP	Tarbase
hsa-miR-15a-3p	CHD4	HITS-CLIP	Tarbase
hsa-miR-15a-3p	CHD4	HITS-CLIP	Tarbase
hsa-miR-15a-3p	PPP2CA	HITS-CLIP	Tarbase
hsa-miR-15a-3p	ASH1L	HITS-CLIP	Tarbase
hsa-miR-15a-3p	MYB	HITS-CLIP	Tarbase
hsa-miR-15a-3p	PPP6C	PAR-CLIP	Tarbase
hsa-miR-15a-3p	PPP6C	HITS-CLIP	Tarbase
hsa-miR-15a-3p	PPP6C	PAR-CLIP	Tarbase
hsa-miR-15a-3p	CBX3	HITS-CLIP	Tarbase
hsa-miR-15a-3p	MORF4L2	HITS-CLIP	Tarbase
hsa-miR-15a-3p	USP22	HITS-CLIP	Tarbase
hsa-miR-15a-3p	USP22	HITS-CLIP	Tarbase
hsa-miR-15a-3p	TRIM28	HITS-CLIP	Tarbase
hsa-miR-15a-3p	TRIM28	HITS-CLIP	Tarbase
hsa-miR-15a-3p	TRIM28	HITS-CLIP	Tarbase
hsa-miR-15a-3p	MYC	HITS-CLIP	Tarbase
hsa-miR-15a-3p	RERE	HITS-CLIP	Tarbase
hsa-miR-15a-3p	DUSP11	HITS-CLIP	Tarbase
hsa-miR-15a-3p	HIST1H4H	HITS-CLIP	Tarbase
hsa-miR-15a-3p	SETD5	HITS-CLIP	Tarbase
hsa-miR-15a-3p	SETD5	HITS-CLIP	Tarbase
hsa-miR-15a-3p	PPM1D	HITS-CLIP	Tarbase
hsa-miR-15a-3p	KLF11	HITS-CLIP	Tarbase
hsa-miR-15a-3p	PPP1CA	HITS-CLIP	Tarbase
hsa-miR-15a-3p	CHD2	HITS-CLIP	Tarbase
hsa-miR-15a-3p	FOSL1	HITS-CLIP	Tarbase
hsa-miR-15a-3p	MTA1	HITS-CLIP	Tarbase
hsa-miR-15a-3p	PPP1CC	HITS-CLIP	Tarbase
hsa-miR-15a-3p	NAP1L4	HITS-CLIP	Tarbase
hsa-miR-15a-3p	PPP2R2A	HITS-CLIP	Tarbase
hsa-miR-15a-3p	MLLT6	HITS-CLIP	Tarbase
hsa-miR-141-5p	ADRB1	PAR-CLIP	miRTarbase
hsa-miR-141-5p	ADRB1	PAR-CLIP	miRTarbase
hsa-miR-141-5p	ADRB1	PAR-CLIP	miRTarbase
hsa-miR-141-5p	ADRB1	PAR-CLIP	miRTarbase
hsa-miR-141-5p	ADRB1	PAR-CLIP	miRTarbase
hsa-miR-141-5p	SUZ12	PAR-CLIP	miRTarbase
hsa-miR-141-5p	H3F3B	PAR-CLIP	miRTarbase
hsa-miR-141-5p	KANSL3	HITS-CLIP	miRTarbase
hsa-miR-141-5p	HLA-DRB1	HITS-CLIP	miRTarbase
hsa-miR-141-5p	MTA3	HITS-CLIP	miRTarbase
hsa-miR-141-5p	INO80D	HITS-CLIP	miRTarbase
hsa-miR-141-5p	RNF8	HITS-CLIP	miRTarbase
hsa-miR-141-5p	HEATR5A	HITS-CLIP	miRTarbase
hsa-miR-141-5p	CREBBP	HITS-CLIP	Tarbase
hsa-miR-141-5p	UBR2	HITS-CLIP	Tarbase
hsa-miR-141-5p	PHF20	HITS-CLIP	Tarbase
hsa-miR-141-5p	CENPQ	HITS-CLIP	Tarbase
hsa-miR-141-5p	CENPQ	HITS-CLIP	Tarbase
hsa-miR-141-5p	TAF11	HITS-CLIP	Tarbase
hsa-miR-141-5p	ING3	HITS-CLIP	Tarbase
hsa-miR-141-5p	BAZ2A	HITS-CLIP	Tarbase
hsa-miR-141-5p	BAZ2A	HITS-CLIP	Tarbase
hsa-miR-141-5p	MLLT10	HITS-CLIP	Tarbase
hsa-miR-141-5p	NCOA1	HITS-CLIP	Tarbase
hsa-miR-141-5p	H2AFY2	HITS-CLIP	Tarbase
hsa-miR-141-5p	RBBP7	HITS-CLIP	Tarbase
hsa-miR-141-5p	RBBP7	HITS-CLIP	Tarbase
hsa-miR-141-5p	PPP2R1A	HITS-CLIP	Tarbase
hsa-miR-141-5p	PPP3CB	HITS-CLIP	Tarbase
hsa-miR-141-5p	SUPT6H	HITS-CLIP	Tarbase
hsa-miR-141-5p	PPP6R3	HITS-CLIP	Tarbase
hsa-miR-141-5p	DUSP16	HITS-CLIP	Tarbase
hsa-miR-141-5p	INO80D	HITS-CLIP	Tarbase
hsa-miR-141-5p	KDM5B	HITS-CLIP	Tarbase
hsa-miR-141-5p	HEATR1	HITS-CLIP	Tarbase
hsa-miR-141-5p	TNFRSF10B	HITS-CLIP	Tarbase
hsa-miR-141-5p	TNFRSF10B	HITS-CLIP	Tarbase
hsa-miR-141-5p	MORF4L2	HITS-CLIP	Tarbase
hsa-miR-141-5p	MORF4L2	HITS-CLIP	Tarbase
hsa-miR-141-5p	MORF4L2	HITS-CLIP	Tarbase
hsa-miR-141-5p	YEATS4	HITS-CLIP	Tarbase
hsa-miR-141-5p	YEATS4	HITS-CLIP	Tarbase
hsa-miR-141-5p	YEATS4	HITS-CLIP	Tarbase
hsa-miR-141-5p	YEATS4	HITS-CLIP	Tarbase
hsa-miR-141-5p	YEATS4	HITS-CLIP	Tarbase
hsa-miR-141-5p	TRIM28	HITS-CLIP	Tarbase
hsa-miR-141-5p	PRKAA1	HITS-CLIP	Tarbase
hsa-miR-141-5p	PRKAA1	HITS-CLIP	Tarbase
hsa-miR-141-5p	CLOCK	HITS-CLIP	Tarbase
hsa-miR-141-5p	EPC2	HITS-CLIP	Tarbase
hsa-miR-141-5p	SRSF1	HITS-CLIP	Tarbase
hsa-miR-141-5p	PPP2R1B	HITS-CLIP	Tarbase
hsa-miR-141-5p	IDH1	HITS-CLIP	Tarbase
hsa-miR-141-5p	SETD1B	HITS-CLIP	Tarbase
hsa-miR-141-5p	URB1	HITS-CLIP	Tarbase
hsa-miR-141-5p	GATAD2B	HITS-CLIP	Tarbase
hsa-miR-141-5p	PARP1	HITS-CLIP	Tarbase
hsa-miR-141-5p	KDM6A	HITS-CLIP	Tarbase
hsa-miR-141-5p	TAF1	HITS-CLIP	Tarbase
hsa-miR-141-5p	SMARCA5	HITS-CLIP	Tarbase
hsa-miR-141-5p	PPP4R1	HITS-CLIP	Tarbase
hsa-miR-141-5p	KLF10	HITS-CLIP	Tarbase
hsa-miR-141-5p	KLF10	HITS-CLIP	Tarbase
hsa-miR-141-5p	HEATR3	HITS-CLIP	Tarbase
hsa-miR-141-5p	MYSM1	HITS-CLIP	Tarbase
hsa-miR-141-5p	YY1AP1	HITS-CLIP	Tarbase
hsa-miR-141-5p	RAD54L2	HITS-CLIP	Tarbase
hsa-miR-141-5p	NIPBL	HITS-CLIP	Tarbase
hsa-miR-141-5p	PPP2R3B	HITS-CLIP	Tarbase
hsa-miR-141-5p	CHD3	HITS-CLIP	Tarbase
hsa-miR-141-5p	BPTF	HITS-CLIP	Tarbase
hsa-miR-141-5p	CAMTA1	HITS-CLIP	Tarbase
hsa-miR-141-5p	JMJD1C	HITS-CLIP	Tarbase
hsa-miR-141-5p	JMJD1C	HITS-CLIP	Tarbase
hsa-miR-141-5p	HCFC1	HITS-CLIP	Tarbase
hsa-miR-141-5p	PPP2R2D	HITS-CLIP	Tarbase
hsa-miR-141-5p	RPS6KA3	HITS-CLIP	Tarbase
hsa-miR-141-5p	CHD9	HITS-CLIP	Tarbase
hsa-miR-141-5p	SUZ12	HITS-CLIP	Tarbase
hsa-miR-141-5p	IDH2	HITS-CLIP	Tarbase
hsa-miR-141-5p	HDAC2	HITS-CLIP	Tarbase
hsa-miR-141-5p	RING1	HITS-CLIP	Tarbase
hsa-miR-141-5p	NAP1L4	HITS-CLIP	Tarbase
hsa-miR-141-5p	PPP1CB	HITS-CLIP	Tarbase
hsa-miR-141-5p	PRKDC	HITS-CLIP	Tarbase
hsa-miR-141-5p	SMEK2	HITS-CLIP	Tarbase
hsa-miR-141-3p	BAP1	Reporter assay	miRTarbase
hsa-miR-141-3p	BAP1	Microarray	miRTarbase
hsa-miR-141-3p	CLOCK	Luciferase reporter assay//Reporter assay	miRTarbase
hsa-miR-141-3p	CLOCK	Northern blot//qRT-PCR//Western blot	miRTarbase
hsa-miR-141-3p	UBAP1	Luciferase reporter assay//Western blot//Reporter assay;Western blot;Other	miRTarbase
hsa-miR-141-3p	CDYL	Luciferase reporter assay//Western blot	miRTarbase
hsa-miR-141-3p	KLF11	Reporter assay	miRTarbase
hsa-miR-141-3p	OGT	PAR-CLIP	miRTarbase
hsa-miR-141-3p	OGT	PAR-CLIP	miRTarbase
hsa-miR-141-3p	ATXN7L1	PAR-CLIP	miRTarbase
hsa-miR-141-3p	H2AFZ	PAR-CLIP	miRTarbase
hsa-miR-141-3p	H2AFZ	PAR-CLIP	miRTarbase
hsa-miR-141-3p	PRKAA2	HITS-CLIP	miRTarbase
hsa-miR-141-3p	MBTD1	HITS-CLIP	Tarbase
hsa-miR-141-3p	MATR3	HITS-CLIP	Tarbase
hsa-miR-141-3p	RB1CC1	HITS-CLIP	Tarbase
hsa-miR-141-3p	RB1CC1	HITS-CLIP	Tarbase
hsa-miR-141-3p	ADRB1	HITS-CLIP	Tarbase
hsa-miR-141-3p	KDM5A	HITS-CLIP	Tarbase
hsa-miR-141-3p	FOSL2	HITS-CLIP	Tarbase
hsa-miR-141-3p	USP33	PAR-CLIP	Tarbase
hsa-miR-141-3p	PPP2R5C	HITS-CLIP	Tarbase
hsa-miR-141-3p	SRCAP	HITS-CLIP	Tarbase
hsa-miR-141-3p	SRCAP	HITS-CLIP	Tarbase
hsa-miR-141-3p	BTAF1	HITS-CLIP	Tarbase
hsa-miR-141-3p	CHD8	HITS-CLIP	Tarbase
hsa-miR-141-3p	STK4	HITS-CLIP	Tarbase
hsa-miR-141-3p	USP31	HITS-CLIP	Tarbase
hsa-miR-141-3p	H2AFV	HITS-CLIP	Tarbase
hsa-miR-141-3p	H2AFV	HITS-CLIP	Tarbase
hsa-miR-141-3p	DUSP3	HITS-CLIP	Tarbase
hsa-miR-141-3p	DUSP3	HITS-CLIP	Tarbase
hsa-miR-141-3p	NR3C1	HITS-CLIP	Tarbase
hsa-miR-141-3p	INO80D	HITS-CLIP	Tarbase
hsa-miR-141-3p	TAF1B	PAR-CLIP	Tarbase
hsa-miR-141-3p	ASH1L	HITS-CLIP	Tarbase
hsa-miR-141-3p	ASH1L	PAR-CLIP	Tarbase
hsa-miR-141-3p	SRSF11	HITS-CLIP	Tarbase
hsa-miR-141-3p	PPP6C	HITS-CLIP	Tarbase
hsa-miR-141-3p	CDK2	Western Blot	Tarbase
hsa-miR-141-3p	MORF4L2	HITS-CLIP	Tarbase
hsa-miR-141-3p	NCOA3	HITS-CLIP	Tarbase
hsa-miR-141-3p	NCOA3	HITS-CLIP	Tarbase
hsa-miR-141-3p	USP22	HITS-CLIP	Tarbase
hsa-miR-141-3p	FOXA1	HITS-CLIP	Tarbase
hsa-miR-141-3p	FOXA1	HITS-CLIP	Tarbase
hsa-miR-141-3p	MLLT4	HITS-CLIP	Tarbase
hsa-miR-141-3p	PRKAA1	HITS-CLIP	Tarbase
hsa-miR-141-3p	H3F3B	HITS-CLIP	Tarbase
hsa-miR-141-3p	CLOCK	Luciferase Reporter Assay	Tarbase
hsa-miR-141-3p	CLOCK	Luciferase Reporter Assay	Tarbase
hsa-miR-141-3p	SRSF1	HITS-CLIP	Tarbase
hsa-miR-141-3p	ANKRD52	HITS-CLIP	Tarbase
hsa-miR-141-3p	ANKRD52	HITS-CLIP	Tarbase
hsa-miR-141-3p	ANKRD52	HITS-CLIP	Tarbase
hsa-miR-141-3p	SETD1B	HITS-CLIP	Tarbase
hsa-miR-141-3p	SETD1B	HITS-CLIP	Tarbase
hsa-miR-141-3p	NCOA2	HITS-CLIP	Tarbase
hsa-miR-141-3p	NCOA2	HITS-CLIP	Tarbase
hsa-miR-141-3p	RERE	HITS-CLIP	Tarbase
hsa-miR-141-3p	RERE	HITS-CLIP	Tarbase
hsa-miR-141-3p	SETDB1	HITS-CLIP	Tarbase
hsa-miR-141-3p	GATAD2B	HITS-CLIP	Tarbase
hsa-miR-141-3p	SETD7	HITS-CLIP	Tarbase
hsa-miR-141-3p	OGT	HITS-CLIP	Tarbase
hsa-miR-141-3p	PPP4R1	HITS-CLIP	Tarbase
hsa-miR-141-3p	RNF20	HITS-CLIP	Tarbase
hsa-miR-141-3p	HIST1H2BD	HITS-CLIP	Tarbase
hsa-miR-141-3p	EOGT	HITS-CLIP	Tarbase
hsa-miR-141-3p	BAP1	Luciferase Reporter Assay	Tarbase
hsa-miR-141-3p	BAP1	Luciferase Reporter Assay	Tarbase
hsa-miR-141-3p	H2AFZ	HITS-CLIP	Tarbase
hsa-miR-141-3p	WDR82	HITS-CLIP	Tarbase
hsa-miR-141-3p	HEATR2	HITS-CLIP	Tarbase
hsa-miR-141-3p	UBAP1	Luciferase Reporter Assay	Tarbase
hsa-miR-141-3p	UBAP1	Western Blot	Tarbase
hsa-miR-141-3p	ATMIN	HITS-CLIP	Tarbase
hsa-miR-141-3p	MECP2	HITS-CLIP	Tarbase
hsa-miR-141-3p	NFRKB	HITS-CLIP	Tarbase
hsa-miR-141-3p	ASXL1	HITS-CLIP	Tarbase
hsa-miR-141-3p	KLF11	Luciferase Reporter Assay	Tarbase
hsa-miR-141-3p	KLF11	Luciferase Reporter Assay	Tarbase
hsa-miR-141-3p	CHD2	HITS-CLIP	Tarbase
hsa-miR-141-3p	CHD9	HITS-CLIP	Tarbase
hsa-miR-141-3p	TAF7	HITS-CLIP	Tarbase
hsa-miR-141-3p	SMYD3	HITS-CLIP	Tarbase
hsa-miR-141-3p	USP7	HITS-CLIP	Tarbase
hsa-miR-141-3p	TET3	HITS-CLIP	Tarbase
hsa-miR-141-3p	TOP1	HITS-CLIP	Tarbase
hsa-miR-141-3p	NAP1L4	HITS-CLIP	Tarbase
hsa-miR-141-3p	PPP2R2A	HITS-CLIP	Tarbase
hsa-miR-141-3p	TAF15	HITS-CLIP	Tarbase
