# Supplementary material for: Methylome-based cell-of-origin modeling (Methyl-COOM) identifies aberrant expression of immune regulatory molecules in CLL
Source: Genome Med. 2020 Mar 18;12:29. doi: 10.1186/s13073-020-00724-7 (PMC7081711; doi:10.1186/s13073-020-00724-7)
Supplement: Supplementary file 9 — Table S8, list of linear B cell-specific CpGs. [file 13073_2020_724_MOESM9_ESM.xlsx]

## Sheet: Sheet1
Supplementary Table S8: List of linear B cell-specific CpGs
CpG
cg00001249
cg00001269
cg00001747
cg00001809
cg00001854
cg00001930
cg00002080
cg00002145
cg00002810
cg00003298
cg00003858
cg00003965
cg00003994
cg00004421
cg00004775
cg00005847
cg00006081
cg00006397
cg00006867
cg00007076
cg00007987
cg00008033
cg00008621
cg00008629
cg00008647
cg00008695
cg00009053
cg00009293
cg00009306
cg00009553
cg00009922
cg00010742
cg00011346
cg00011513
cg00012522
cg00012576
cg00013301
cg00013349
cg00013369
cg00014260
cg00014333
cg00014377
cg00015121
cg00015343
cg00015770
cg00017437
cg00017489
cg00017546
cg00017842
cg00018010
cg00018606
cg00018828
cg00018845
cg00019275
cg00019495
cg00019826
cg00019877
cg00020405
cg00020474
cg00020991
cg00021030
cg00021242
cg00021275
cg00021513
cg00022054
cg00022101
cg00022871
cg00022900
cg00022997
cg00023174
cg00023464
cg00023726
cg00024086
cg00024516
cg00025643
cg00026033
cg00026141
cg00026603
cg00026703
cg00026909
cg00027083
cg00027155
cg00028013
cg00028034
cg00028056
cg00028507
cg00028677
cg00028844
cg00028929
cg00028935
cg00029521
cg00030005
cg00030588
cg00030807
cg00031013
cg00031105
cg00031165
cg00031346
cg00032366
cg00032879
cg00032884
cg00032912
cg00033584
cg00033909
cg00034003
cg00034076
cg00034154
cg00035220
cg00035347
cg00036408
cg00036585
cg00036732
cg00037457
cg00038020
cg00038675
cg00038857
cg00039016
cg00039326
cg00039441
cg00039480
cg00039489
cg00040322
cg00040590
cg00040749
cg00040837
cg00040986
cg00041014
cg00041047
cg00041270
cg00041636
cg00041989
cg00042156
cg00043591
cg00043788
cg00043792
cg00043819
cg00044097
cg00044245
cg00044354
cg00044372
cg00044665
cg00045118
cg00045515
cg00045762
cg00045902
cg00046499
cg00046625
cg00049033
cg00049047
cg00049156
cg00049664
cg00049883
cg00049892
cg00050271
cg00051371
cg00052665
cg00053393
cg00053851
cg00054197
cg00054301
cg00054472
cg00054639
cg00054774
cg00055073
cg00055557
cg00055603
cg00055771
cg00055981
cg00055986
cg00056002
cg00056624
cg00057240
cg00058329
cg00059459
cg00059643
cg00059662
cg00060641
cg00060836
cg00061031
cg00061520
cg00061635
cg00061792
cg00062437
cg00063174
cg00063291
cg00063346
cg00063357
cg00063699
cg00063703
cg00064255
cg00064261
cg00064296
cg00064778
cg00065215
cg00065570
cg00065905
cg00066239
cg00066663
cg00067018
cg00067528
cg00067720
cg00068102
cg00068433
cg00069860
cg00070529
cg00070870
cg00071051
cg00071241
cg00071250
cg00071265
cg00071727
cg00072407
cg00073549
cg00073794
cg00073837
cg00074145
cg00074348
cg00075103
cg00075975
cg00076538
cg00076555
cg00076797
cg00078221
cg00078513
cg00078861
cg00079302
cg00079388
cg00079485
cg00079598
cg00080188
cg00080252
cg00080418
cg00080682
cg00081087
cg00081404
cg00081975
cg00082285
cg00082912
cg00083018
cg00083059
cg00084019
cg00084202
cg00084720
cg00085013
cg00085493
cg00086429
cg00086488
cg00086493
cg00087067
cg00087368
cg00087906
cg00088148
cg00088183
cg00089091
cg00089314
cg00089451
cg00089798
cg00089814
cg00089945
cg00090261
cg00090265
cg00090452
cg00090737
cg00090787
cg00091285
cg00091760
cg00092443
cg00092992
cg00093544
cg00093643
cg00093829
cg00093971
cg00094303
cg00094734
cg00094735
cg00094744
cg00094898
cg00095259
cg00095326
cg00095431
cg00095523
cg00095594
cg00095629
cg00095688
cg00096307
cg00096747
cg00096922
cg00097088
cg00097146
cg00097550
cg00097645
cg00097790
cg00097968
cg00098144
cg00098182
cg00098336
cg00098819
cg00099519
cg00099869
cg00099976
cg00100420
cg00100762
cg00100800
cg00101555
cg00101629
cg00101712
cg00101715
cg00103398
cg00104608
cg00105628
cg00106196
cg00106345
cg00106565
cg00106609
cg00107490
cg00107667
cg00107772
cg00108098
cg00109076
cg00109131
cg00109302
cg00109356
cg00110545
cg00110654
cg00110832
cg00111697
cg00111778
cg00112238
cg00112260
cg00113225
cg00113315
cg00113369
cg00113663
cg00114160
cg00115178
cg00115639
cg00116092
cg00118229
cg00118342
cg00118507
cg00118808
cg00118989
cg00119034
cg00119181
cg00119314
cg00120147
cg00120254
cg00120274
cg00120416
cg00120783
cg00121045
cg00121255
cg00121374
cg00122347
cg00122406
cg00123055
cg00124009
cg00125002
cg00125544
cg00126320
cg00126959
cg00127167
cg00128273
cg00128482
cg00128702
cg00129563
cg00129785
cg00130165
cg00130707
cg00130710
cg00130778
cg00130947
cg00131081
cg00131423
cg00131758
cg00131893
cg00131983
cg00132141
cg00132716
cg00132769
cg00132888
cg00133811
cg00135056
cg00135293
cg00135874
cg00136400
cg00136405
cg00136477
cg00136547
cg00139496
cg00139681
cg00141308
cg00141925
cg00142670
cg00143249
cg00144335
cg00145118
cg00145150
cg00145904
cg00146437
cg00147248
cg00147509
cg00147788
cg00148025
cg00148223
cg00149679
cg00149716
cg00150837
cg00150882
cg00151048
cg00151124
cg00151709
cg00151728
cg00152008
cg00152034
cg00152117
cg00152340
cg00152577
cg00152611
cg00152708
cg00152946
cg00152948
cg00153306
cg00153448
cg00153622
cg00153693
cg00153707
cg00154357
cg00154727
cg00154920
cg00155619
cg00156118
cg00156194
cg00156633
cg00156948
cg00156995
cg00157109
cg00157223
cg00157228
cg00157439
cg00157477
cg00157572
cg00157668
cg00157935
cg00157962
cg00158122
cg00158934
cg00159764
cg00159873
cg00160027
cg00160359
cg00160872
cg00160976
cg00161683
cg00162231
cg00162344
cg00162611
cg00163541
cg00163546
cg00163674
cg00163861
cg00164189
cg00164678
cg00164837
cg00166915
cg00167670
cg00167836
cg00167958
cg00168240
cg00169019
cg00169930
cg00170295
cg00170487
cg00171092
cg00171214
cg00171729
cg00171942
cg00172227
cg00172410
cg00172597
cg00172603
cg00172794
cg00173538
cg00173659
cg00174179
cg00174428
cg00174508
cg00174713
cg00174718
cg00174743
cg00175153
cg00175344
cg00175487
cg00175702
cg00176675
cg00176949
cg00177142
cg00177237
cg00177388
cg00177797
cg00178249
cg00178928
cg00179795
cg00179921
cg00179940
cg00180470
cg00180762
cg00181439
cg00181669
cg00181849
cg00182273
cg00182421
cg00182639
cg00183107
cg00183186
cg00183639
cg00184203
cg00184461
cg00184953
cg00186374
cg00187059
cg00187120
cg00187244
cg00187299
cg00187437
cg00187889
cg00188654
cg00188748
cg00189989
cg00191178
cg00192031
cg00192046
cg00193021
cg00193200
cg00193668
cg00193947
cg00193959
cg00194126
cg00194771
cg00195796
cg00196151
cg00196414
cg00196671
cg00197313
cg00198586
cg00199059
cg00199065
cg00199549
cg00199753
cg00199759
cg00201025
cg00201275
cg00201457
cg00201534
cg00201870
cg00202479
cg00203913
cg00204501
cg00204748
cg00205786
cg00205813
cg00206161
cg00206463
cg00207280
cg00207352
cg00207428
cg00207731
cg00207921
cg00208012
cg00208153
cg00208830
cg00208967
cg00209038
cg00209786
cg00210271
cg00210856
cg00211609
cg00211630
cg00212521
cg00212979
cg00212988
cg00213044
cg00213281
cg00213295
cg00214012
cg00214791
cg00214856
cg00214970
cg00215019
cg00215182
cg00215432
cg00215521
cg00218404
cg00218447
cg00218914
cg00219855
cg00220113
cg00220335
cg00220661
cg00221012
cg00221658
cg00221709
cg00223245
cg00223899
cg00225006
cg00225157
cg00225196
cg00225697
cg00226225
cg00226545
cg00226822
cg00226849
cg00226931
cg00227093
cg00227781
cg00228475
cg00228796
cg00229387
cg00229532
cg00229754
cg00229809
cg00229868
cg00230517
cg00230584
cg00230700
cg00230715
cg00230924
cg00231771
cg00232092
cg00232265
cg00232679
cg00232735
cg00233028
cg00233943
cg00233948
cg00234384
cg00234446
cg00234625
cg00234691
cg00234998
cg00235367
cg00235442
cg00235661
cg00236729
cg00237010
cg00237606
cg00238182
cg00238249
cg00238391
cg00238805
cg00239353
cg00239563
cg00239657
cg00239835
cg00240195
cg00240205
cg00240734
cg00241941
cg00242325
cg00242951
cg00242976
cg00243040
cg00243854
cg00244299
cg00244745
cg00244920
cg00245465
cg00245746
cg00245890
cg00245896
cg00246301
cg00247269
cg00247557
cg00247614
cg00248449
cg00248828
cg00248856
cg00249511
cg00250123
cg00250391
cg00250414
cg00251358
cg00251973
cg00252282
cg00252529
cg00252534
cg00252814
cg00253228
cg00253269
cg00253658
cg00253735
cg00253851
cg00254133
cg00254470
cg00254886
cg00255099
cg00255368
cg00255699
cg00255732
cg00255821
cg00256593
cg00256675
cg00256928
cg00257047
cg00257473
cg00257775
cg00257800
cg00259367
cg00259388
cg00259755
cg00259886
cg00260012
cg00260512
cg00260575
cg00260937
cg00261912
cg00262159
cg00263146
cg00263760
cg00264500
cg00264754
cg00264799
cg00266322
cg00266604
cg00267142
cg00267156
cg00267360
cg00268185
cg00268476
cg00268840
cg00268869
cg00269817
cg00270259
cg00270460
cg00270654
cg00270764
cg00271522
cg00272971
cg00273543
cg00273863
cg00274357
cg00275126
cg00275503
cg00275741
cg00275828
cg00276214
cg00278028
cg00278547
cg00280220
cg00280799
cg00281664
cg00282195
cg00282877
cg00283524
cg00283876
cg00283887
cg00284386
cg00284390
cg00284551
cg00285394
cg00285620
cg00286102
cg00286512
cg00286909
cg00287312
cg00287589
cg00288376
cg00288736
cg00288844
cg00289094
cg00289546
cg00290023
cg00290101
cg00290506
cg00291051
cg00291478
cg00292029
cg00292636
cg00292947
cg00292986
cg00293060
cg00293940
cg00293996
cg00294267
cg00294684
cg00294940
cg00295060
cg00295182
cg00295259
cg00295325
cg00295382
cg00295485
cg00295794
cg00296578
cg00297075
cg00297600
cg00297741
cg00297950
cg00298065
cg00298324
cg00298405
cg00298919
cg00298977
cg00299105
cg00299660
cg00299736
cg00299737
cg00300637
cg00300672
cg00300969
cg00301033
cg00301372
cg00301660
cg00301879
cg00302083
cg00302340
cg00303606
cg00303919
cg00304423
cg00305071
cg00305193
cg00305947
cg00305993
cg00306578
cg00306851
cg00306893
cg00307383
cg00308560
cg00308914
cg00309232
cg00309582
cg00309873
cg00309965
cg00310215
cg00310463
cg00310588
cg00311035
cg00311768
cg00311799
cg00311984
cg00312508
cg00313094
cg00313498
cg00314343
cg00314892
cg00314923
cg00314966
cg00314994
cg00315395
cg00315853
cg00316478
cg00316485
cg00316800
cg00316839
cg00317020
cg00317577
cg00317886
cg00318320
cg00318543
cg00318682
cg00319026
cg00319655
cg00320216
cg00320288
cg00320980
cg00321234
cg00321288
cg00321644
cg00321824
cg00322212
cg00322618
cg00323014
cg00323842
cg00324520
cg00325381
cg00325491
cg00325910
cg00326183
cg00326208
cg00326785
cg00326908
cg00327332
cg00327437
cg00327947
cg00328075
cg00328376
cg00328870
cg00329039
cg00329270
cg00329447
cg00330346
cg00330825
cg00331027
cg00331283
cg00332021
cg00332067
cg00332146
cg00332421
cg00332882
cg00332937
cg00333512
cg00333800
cg00333824
cg00334056
cg00334063
cg00334274
cg00334863
cg00334933
cg00334976
cg00335219
cg00335712
cg00335892
cg00336149
cg00336164
cg00336669
cg00336700
cg00337090
cg00337440
cg00337703
cg00338519
cg00338852
cg00339241
cg00339331
cg00339415
cg00339556
cg00339695
cg00340127
cg00341204
cg00341415
cg00342891
cg00343063
cg00343127
cg00343433
cg00343633
cg00344443
cg00345443
cg00346446
cg00346951
cg00347056
cg00347452
cg00347620
cg00347729
cg00347775
cg00347904
cg00348222
cg00349925
cg00350296
cg00350304
cg00350405
cg00350478
cg00350503
cg00351152
cg00351202
cg00352031
cg00352576
cg00353330
cg00353353
cg00353773
cg00353953
cg00354884
cg00355019
cg00355235
cg00355286
cg00355325
cg00355377
cg00355656
cg00356045
cg00356183
cg00356208
cg00356875
cg00357551
cg00357958
cg00357971
cg00358278
cg00358442
cg00358936
cg00359365
cg00359395
cg00359590
cg00360474
cg00360761
cg00361176
cg00361495
cg00361898
cg00362322
cg00362569
cg00362818
cg00363177
cg00364287
cg00364696
cg00365945
cg00366531
cg00366850
cg00366880
cg00367281
cg00367424
cg00367497
cg00368296
cg00368577
cg00368604
cg00369372
cg00370022
cg00370123
cg00370173
cg00371061
cg00371368
cg00372249
cg00372774
cg00372886
cg00373256
cg00373436
cg00373707
cg00374016
cg00374101
cg00374672
cg00374717
cg00375581
cg00375819
cg00375999
cg00376464
cg00376480
cg00376544
cg00377916
cg00377953
cg00378234
cg00378292
cg00378658
cg00379648
cg00379720
cg00380428
cg00380435
cg00380904
cg00381442
cg00381755
cg00382138
cg00382944
cg00383020
cg00383081
cg00383136
cg00383220
cg00383763
cg00384537
cg00384539
cg00384707
cg00385194
cg00386035
cg00386940
cg00387200
cg00387217
cg00387704
cg00388287
cg00388812
cg00388871
cg00390253
cg00390484
cg00390511
cg00390724
cg00391067
cg00391247
cg00391668
cg00391739
cg00392156
cg00392242
cg00392257
cg00392677
cg00393247
cg00393415
cg00393487
cg00393992
cg00394101
cg00394180
cg00394261
cg00394385
cg00394581
cg00395579
cg00395657
cg00396667
cg00396910
cg00397673
cg00397849
cg00397986
cg00398268
cg00398500
cg00398816
cg00399483
cg00400733
cg00403579
cg00403716
cg00404280
cg00405078
cg00405112
cg00405198
cg00405677
cg00405803
cg00406338
cg00406844
cg00407062
cg00407150
cg00407413
cg00407659
cg00407866
cg00407944
cg00408773
cg00409684
cg00409696
cg00409816
cg00409844
cg00410034
cg00410719
cg00411411
cg00411595
cg00411948
cg00412094
cg00412772
cg00413617
cg00415057
cg00415424
cg00415971
cg00415993
cg00416130
cg00416243
cg00416386
cg00416945
cg00417025
cg00417197
cg00417605
cg00418071
cg00418163
cg00418216
cg00418282
cg00418735
cg00420246
cg00420510
cg00420929
cg00421139
cg00421173
cg00421335
cg00421624
cg00422311
cg00422566
cg00422624
cg00422699
cg00422935
cg00423035
cg00423185
cg00423291
cg00423453
cg00423486
cg00423675
cg00423704
cg00424467
cg00424572
cg00424785
cg00425213
cg00425636
cg00426720
cg00426855
cg00426976
cg00427939
cg00427986
cg00428692
cg00429268
cg00430036
cg00431835
cg00432262
cg00432454
cg00432953
cg00433709
cg00434010
cg00434119
cg00434395
cg00434535
cg00435576
cg00435606
cg00435723
cg00436496
cg00437411
cg00439261
cg00440032
cg00441573
cg00441765
cg00441918
cg00442258
cg00442646
cg00443111
cg00443797
cg00444151
cg00444261
cg00444360
cg00444390
cg00445305
cg00445523
cg00445755
cg00446413
cg00446763
cg00447376
cg00448162
cg00448720
cg00448761
cg00449482
cg00449728
cg00449812
cg00450784
cg00450960
cg00451054
cg00451388
cg00451397
cg00452252
cg00452257
cg00452266
cg00452755
cg00452835
cg00453864
cg00454274
cg00455216
cg00455331
cg00455402
cg00455467
cg00455526
cg00456672
cg00457403
cg00457867
cg00457913
cg00458351
cg00458754
cg00458878
cg00458932
cg00459116
cg00459617
cg00459623
cg00460049
cg00460235
cg00460575
cg00460916
cg00461299
cg00462700
cg00463631
cg00463746
cg00463848
cg00463949
cg00463982
cg00464046
cg00464520
cg00464946
cg00465073
cg00465277
cg00465739
cg00466249
cg00466268
cg00466334
cg00466402
cg00466436
cg00466492
cg00466500
cg00466839
cg00467296
cg00467553
cg00468146
cg00468320
cg00468380
cg00468395
cg00469207
cg00469497
cg00469856
cg00470051
cg00470341
cg00470641
cg00471000
cg00471159
cg00472277
cg00472281
cg00472373
cg00472528
cg00472814
cg00472841
cg00473501
cg00473531
cg00474657
cg00474696
cg00474713
cg00476872
cg00476944
cg00476955
cg00477086
cg00477226
cg00478884
cg00479347
cg00479463
cg00479718
cg00480389
cg00481159
cg00481216
cg00481280
cg00481629
cg00481639
cg00482162
cg00482996
cg00483030
cg00483217
cg00484484
cg00485050
cg00485194
cg00486011
cg00486022
cg00486259
cg00486280
cg00486340
cg00486998
cg00487155
cg00487506
cg00488514
cg00488575
cg00489401
cg00489539
cg00489660
cg00490655
cg00490976
cg00491404
cg00491523
cg00491530
cg00491548
cg00492142
cg00492333
cg00494183
cg00495574
cg00495658
cg00495708
cg00495775
cg00495811
cg00495860
cg00496126
cg00496462
cg00496484
cg00497078
cg00497219
cg00497232
cg00497737
cg00498289
cg00498360
cg00498434
cg00498804
cg00499237
cg00499277
cg00499475
cg00499700
cg00500229
cg00500564
cg00501622
cg00502190
cg00502444
cg00502662
cg00502665
cg00502885
cg00503298
cg00503302
cg00503383
cg00504569
cg00504599
cg00504690
cg00504705
cg00504782
cg00505277
cg00505570
cg00506886
cg00507135
cg00508158
cg00508604
cg00508817
cg00508950
cg00509108
cg00509670
cg00509996
cg00510437
cg00510598
cg00510689
cg00510870
cg00511577
cg00511674
cg00512459
cg00512484
cg00512563
cg00513334
cg00513984
cg00514713
cg00514895
cg00514971
cg00515455
cg00515457
cg00515669
cg00516867
cg00516966
cg00517261
cg00517787
cg00518190
cg00518276
cg00518857
cg00519537
cg00519829
cg00519851
cg00519884
cg00520378
cg00520441
cg00521703
cg00521850
cg00522048
cg00522935
cg00523067
cg00523241
cg00523901
cg00524561
cg00524900
cg00525722
cg00525823
cg00526772
cg00527653
cg00528572
cg00528616
cg00529909
cg00529958
cg00530015
cg00530127
cg00530564
cg00530825
cg00530870
cg00530925
cg00531338
cg00532335
cg00532399
cg00532449
cg00532455
cg00532474
cg00532502
cg00532936
cg00533183
cg00533390
cg00534255
cg00534479
cg00534540
cg00535248
cg00535994
cg00536366
cg00536910
cg00537673
cg00537960
cg00537984
cg00538247
cg00538695
cg00538888
cg00539154
cg00539300
cg00539360
cg00539386
cg00539976
cg00540067
cg00540593
cg00540769
cg00541303
cg00542224
cg00543460
cg00543840
cg00544449
cg00544557
cg00544573
cg00544674
cg00545232
cg00545462
cg00545469
cg00545702
cg00545705
cg00545804
cg00546005
cg00546491
cg00547024
cg00547103
cg00547304
cg00547445
cg00547484
cg00548009
cg00548098
cg00548911
cg00549018
cg00549772
cg00549910
cg00550080
cg00550797
cg00551647
cg00551679
cg00552235
cg00552574
cg00553149
cg00553487
cg00554173
cg00554250
cg00554604
cg00554631
cg00555420
cg00555456
cg00555894
cg00557402
cg00557536
cg00557947
cg00558689
cg00559560
cg00560072
cg00560542
cg00561194
cg00561674
cg00561739
cg00561854
cg00562088
cg00562107
cg00562468
cg00562504
cg00563061
cg00563495
cg00563678
cg00563824
cg00563847
cg00563873
cg00564061
cg00564426
cg00564524
cg00564737
cg00564862
cg00564996
cg00565412
cg00565679
cg00565882
cg00566208
cg00566320
cg00566759
cg00566899
cg00566961
cg00569056
cg00569447
cg00570069
cg00570469
cg00571483
cg00571819
cg00572089
cg00572387
cg00573410
cg00573835
cg00573887
cg00574196
cg00574379
cg00574530
cg00574907
cg00575003
cg00575005
cg00577167
cg00577449
cg00577488
cg00577560
cg00578039
cg00578673
cg00579520
cg00579706
cg00579717
cg00579805
cg00580752
cg00580854
cg00580978
cg00581541
cg00582524
cg00582628
cg00582671
cg00582970
cg00582971
cg00583291
cg00583861
cg00584238
cg00584422
cg00584450
cg00584485
cg00585207
cg00585621
cg00586058
cg00586383
cg00586420
cg00586732
cg00586817
cg00587665
cg00587890
cg00588517
cg00588734
cg00589181
cg00589371
cg00589488
cg00589581
cg00590022
cg00590039
cg00590139
cg00591225
cg00591740
cg00591791
cg00591868
cg00591895
cg00592007
cg00592593
cg00592781
cg00593008
cg00593298
cg00593536
cg00593607
cg00594016
cg00594854
cg00595472
cg00596508
cg00597607
cg00598021
cg00598235
cg00598394
cg00598429
cg00598600
cg00598956
cg00599219
cg00599463
cg00599770
cg00601042
cg00601124
cg00602115
cg00602693
cg00603110
cg00604202
cg00604209
cg00604410
cg00604840
cg00606739
cg00607194
cg00607755
cg00607989
cg00608540
cg00608779
cg00609291
cg00609961
cg00610000
cg00610294
cg00610360
cg00610577
cg00611192
cg00612985
cg00613113
cg00613255
cg00613385
cg00613752
cg00613786
cg00614011
cg00614182
cg00614249
cg00614360
cg00615377
cg00615485
cg00615941
cg00616687
cg00617691
cg00618155
cg00618507
cg00618717
cg00619126
cg00619207
cg00619263
cg00620190
cg00620224
cg00620733
cg00621646
cg00621899
cg00621943
cg00622318
cg00622552
cg00622654
cg00622837
cg00623161
cg00623774
cg00624418
cg00625103
cg00625110
cg00625653
cg00625845
cg00626412
cg00626856
cg00627029
cg00628277
cg00628477
cg00628788
cg00629088
cg00629427
cg00629625
cg00630480
cg00630775
cg00630794
cg00630958
cg00631759
cg00632007
cg00632379
cg00632863
cg00633413
cg00634968
cg00635082
cg00635343
cg00635390
cg00636194
cg00636416
cg00636427
cg00636508
cg00637047
cg00637477
cg00637687
cg00637695
cg00638020
cg00638021
cg00638062
cg00638073
cg00638574
cg00638945
cg00639010
cg00639635
cg00640314
cg00640376
cg00640479
cg00641579
cg00642749
cg00643296
cg00643651
cg00643814
cg00643876
cg00644103
cg00644823
cg00644847
cg00645731
cg00646019
cg00646347
cg00647262
cg00647317
cg00647810
cg00648203
cg00648274
cg00648883
cg00649632
cg00650641
cg00650953
cg00651359
cg00652796
cg00653387
cg00653847
cg00654296
cg00654657
cg00654888
cg00655094
cg00656478
cg00656513
cg00656728
cg00656881
cg00657094
cg00657460
cg00657508
cg00658411
cg00658590
cg00658743
cg00658890
cg00659077
cg00659931
cg00660096
cg00661018
cg00661399
cg00661523
cg00661732
cg00661970
cg00662122
cg00662400
cg00662556
cg00663068
cg00663077
cg00663972
cg00663986
cg00664343
cg00664581
cg00664792
cg00665343
cg00665492
cg00665827
cg00667048
cg00667298
cg00667315
cg00667789
cg00668303
cg00668515
cg00669390
cg00670060
cg00670721
cg00671386
cg00671600
cg00671823
cg00672093
cg00672277
cg00672633
cg00672712
cg00672936
cg00673109
cg00673365
cg00674004
cg00674365
cg00674628
cg00674995
cg00675229
cg00675260
cg00676085
cg00676394
cg00676536
cg00676660
cg00676988
cg00678005
cg00678892
cg00679281
cg00679556
cg00679763
cg00679792
cg00679877
cg00681365
cg00682069
cg00682367
cg00683329
cg00683332
cg00683665
cg00684594
cg00685480
cg00685795
cg00685836
cg00686030
cg00686132
cg00686197
cg00686477
cg00686823
cg00686880
cg00686926
cg00687444
cg00688402
cg00688447
cg00688803
cg00688810
cg00688962
cg00689010
cg00689213
cg00689225
cg00689612
cg00689835
cg00690148
cg00690195
cg00690280
cg00690431
cg00690710
cg00690809
cg00690929
cg00691081
cg00691451
cg00691598
cg00691625
cg00691830
cg00691906
cg00692088
cg00692279
cg00692462
cg00692774
cg00692780
cg00693222
cg00694180
cg00694302
cg00695112
cg00695821
cg00696685
cg00697358
cg00697440
cg00697639
cg00697672
cg00697916
cg00697992
cg00698169
cg00698204
cg00698575
cg00698646
cg00698688
cg00699029
cg00699219
cg00699486
cg00699945
cg00699993
cg00700239
cg00701064
cg00701514
cg00701692
cg00702547
cg00703120
cg00703260
cg00703822
cg00705059
cg00706191
cg00706570
cg00706697
cg00706913
cg00707134
cg00707317
cg00707406
cg00707688
cg00707777
cg00707814
cg00708105
cg00708215
cg00709387
cg00709652
cg00709775
cg00709966
cg00710229
cg00710269
cg00710343
cg00710862
cg00711072
cg00711088
cg00711496
cg00711984
cg00712050
cg00712390
cg00712627
cg00712711
cg00713435
cg00713567
cg00714184
cg00714464
cg00714725
cg00714740
cg00715122
cg00715696
cg00716016
cg00716040
cg00716579
cg00717022
cg00718142
cg00718175
cg00718261
cg00718336
cg00718518
cg00718539
cg00719899
cg00720629
cg00721016
cg00721170
cg00721193
cg00721315
cg00721947
cg00722081
cg00722834
cg00723041
cg00723338
cg00723379
cg00723994
cg00724015
cg00724839
cg00725089
cg00725138
cg00725162
cg00725635
cg00726029
cg00726786
cg00727334
cg00727663
cg00727675
cg00728046
cg00729133
cg00729275
cg00730441
cg00731062
cg00731458
cg00731874
cg00732232
cg00732656
cg00732878
cg00733328
cg00733493
cg00733567
cg00733722
cg00733978
cg00735595
cg00735611
cg00735667
cg00735907
cg00735923
cg00736104
cg00736201
cg00736406
cg00736459
cg00736958
cg00737556
cg00737593
cg00737979
cg00738345
cg00738660
cg00738897
cg00739155
cg00739217
[truncated: 57,328 more rows]
